# Supplementary material
Source: MDPI journal article supplement (https://www.mdpi.com/2075-4698/13/12/256)
Supplement: s1 [file s1]

Archive with 1 entries (1 files):
- societies-2728330-supplementary.pdf
