# Supplementary material
Source: MDPI journal article supplement (https://www.mdpi.com/2075-4698/13/12/256)
Supplement: s1 [file s1 › societies-2728330-supplementary.pdf]

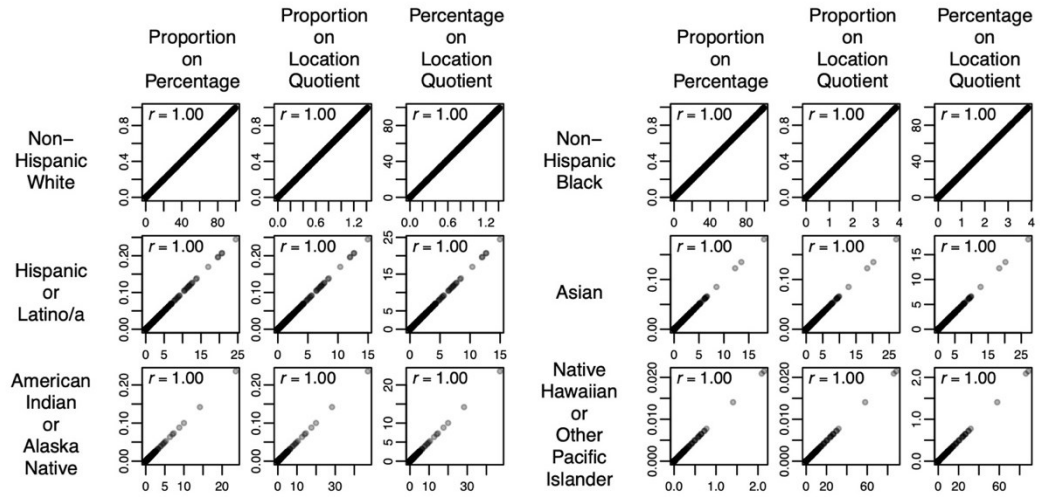

Figure S1. Relationships between census-tract-based measures in the State of Alabama (2000).

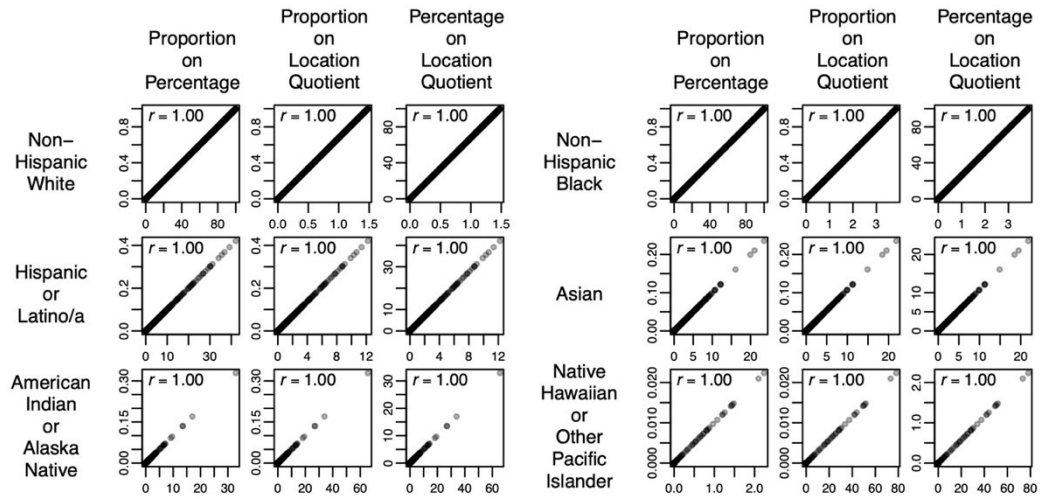

Figure S2. Relationships between census-tract-based measures in the State of Alabama (2010).

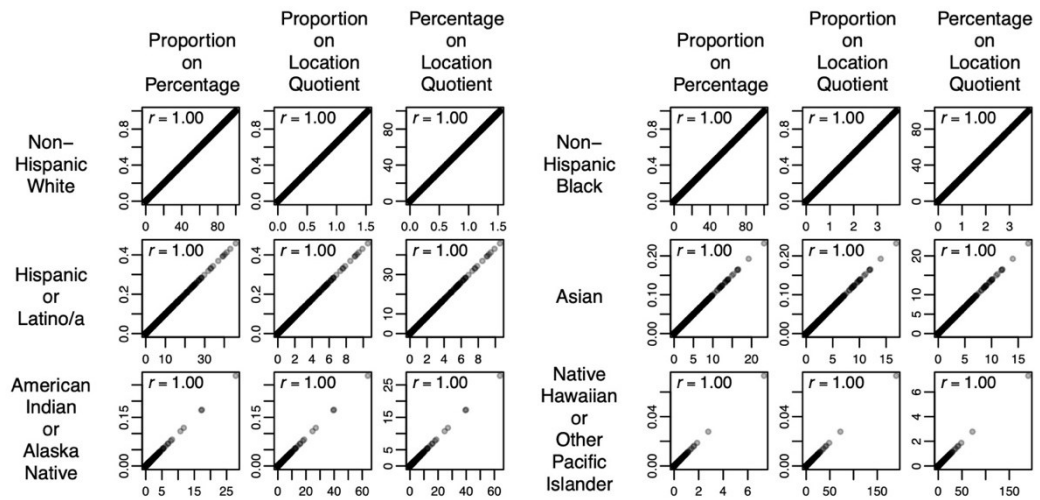

Figure S3. Relationships between census-tract-based measures in the State of Alabama (2020).

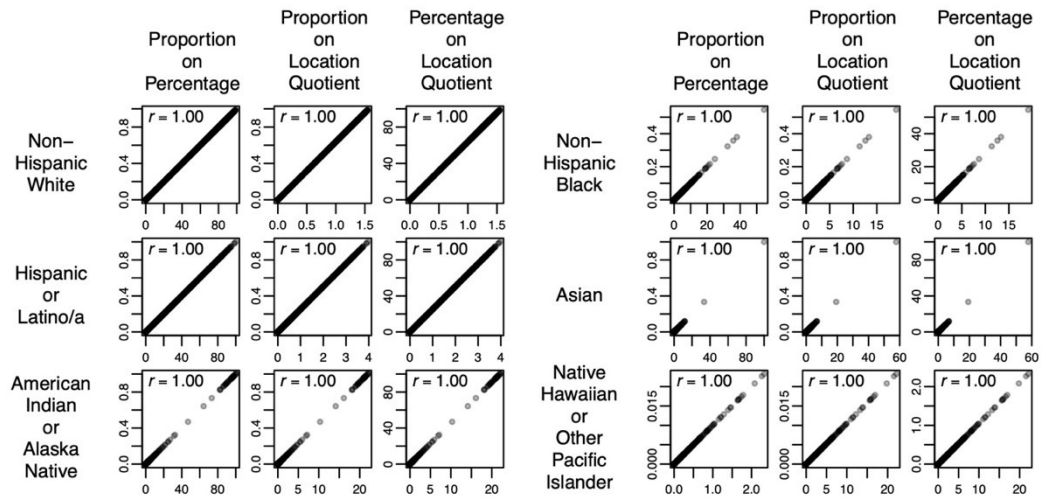

Figure S4. Relationships between census-tract-based measures in the State of Arizona (2000).

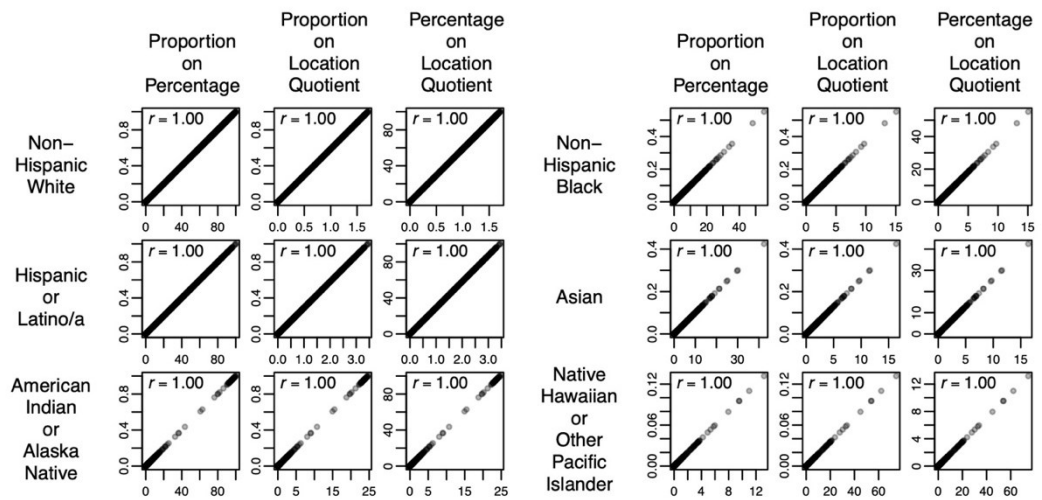

Figure S5. Relationships between census-tract-based measures in the State of Arizona (2010).

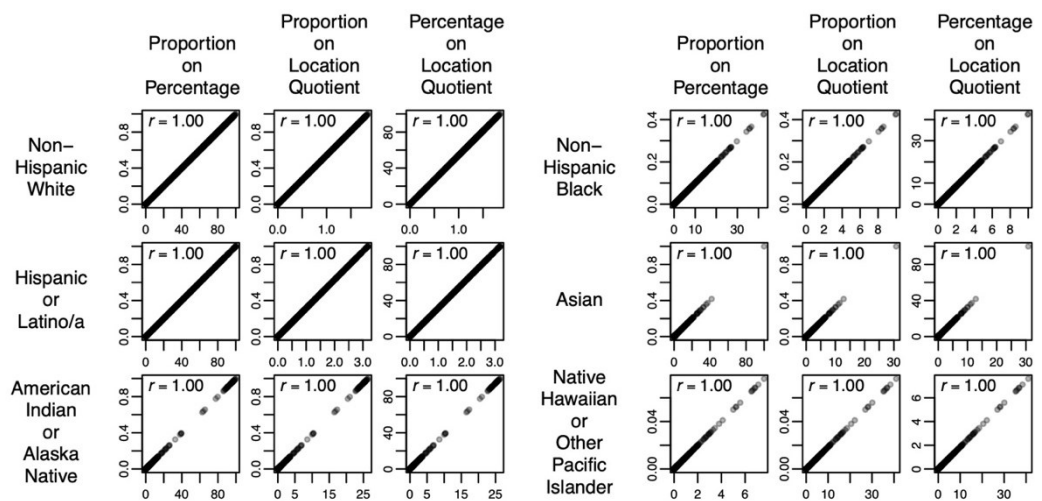

Figure S6. Relationships between census-tract-based measures in the State of Arizona (2020).

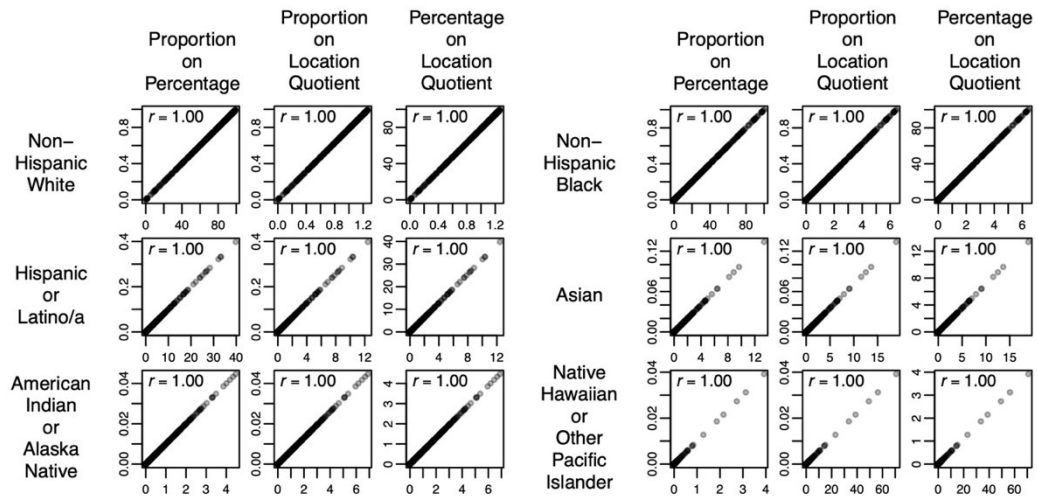

Figure S7. Relationships between census-tract-based measures in the State of Arkansas (2000).

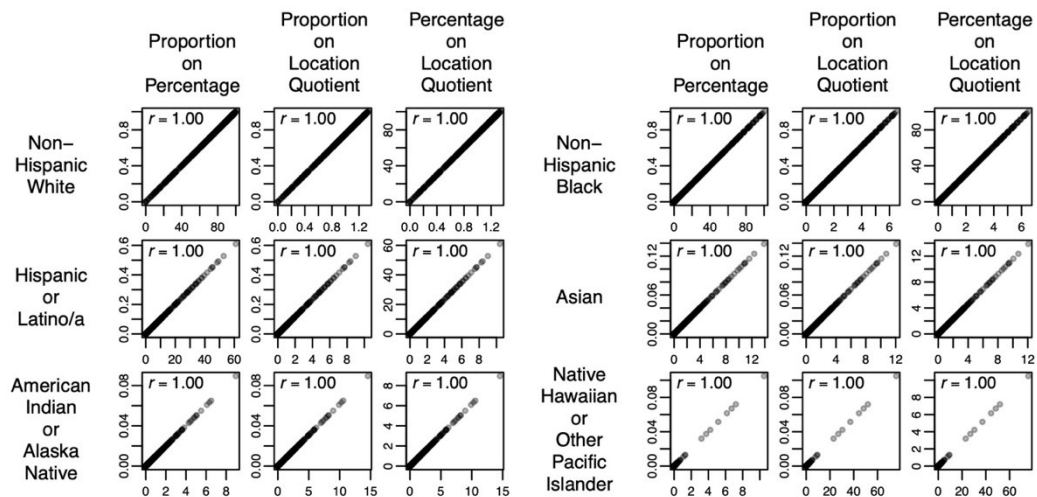

Figure S8. Relationships between census-tract-based measures in the State of Arkansas (2010).

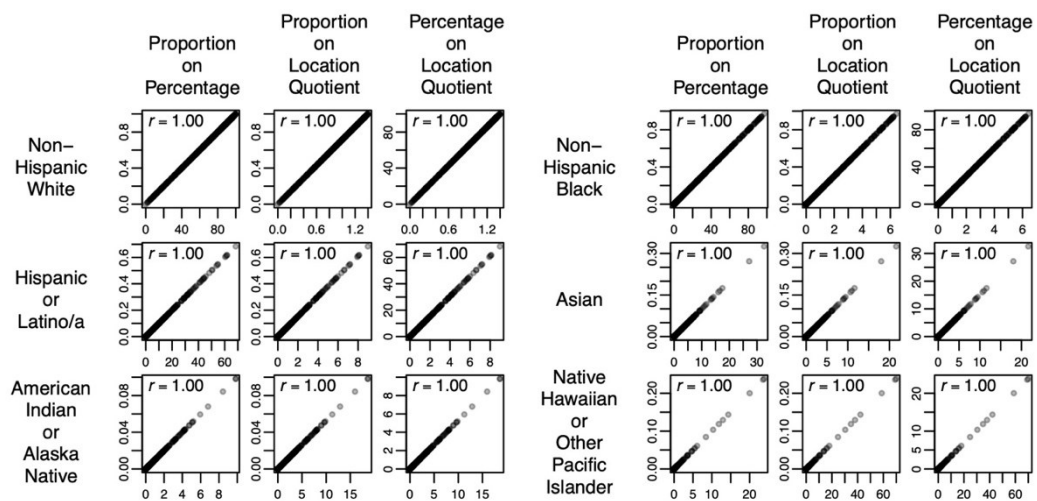

Figure S9. Relationships between census-tract-based measures in the State of Arkansas (2020).

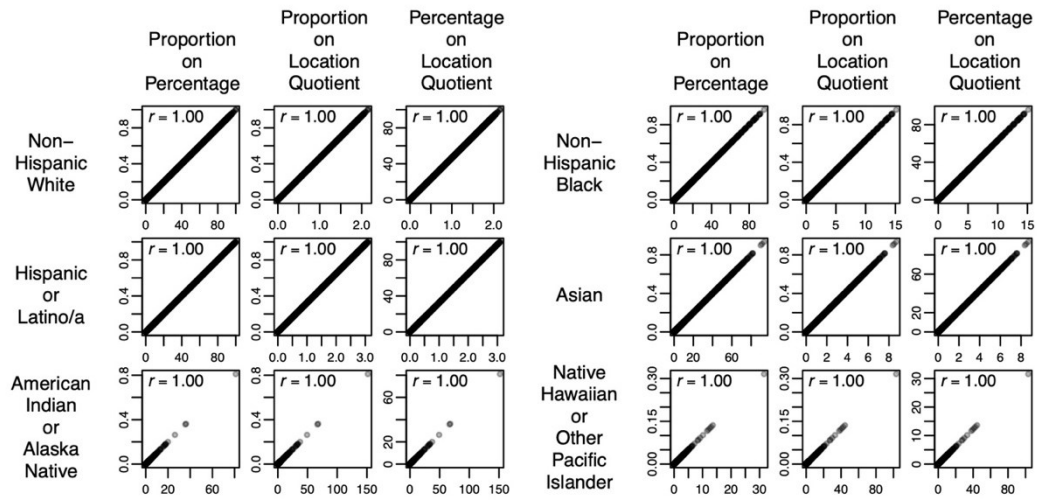

Figure S10. Relationships between census-tract-based measures in the State of California (2000).

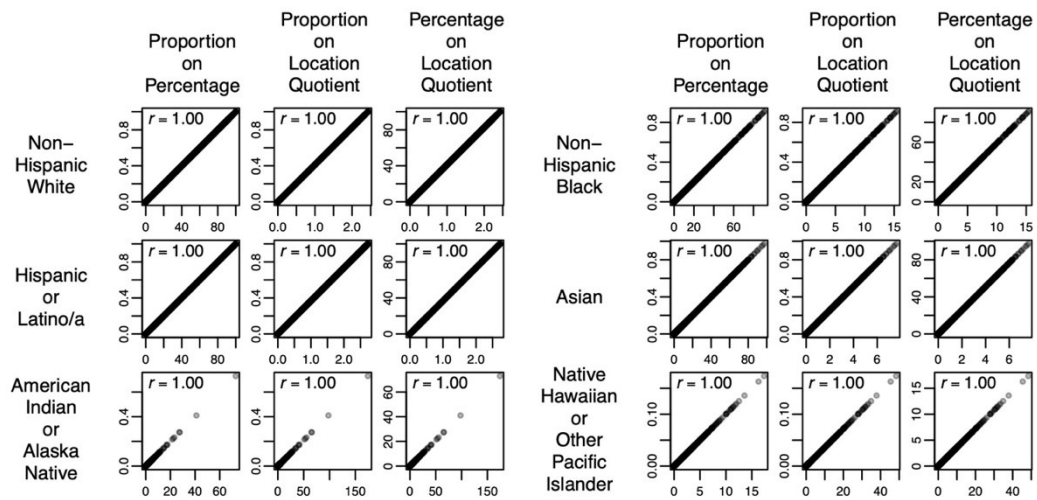

Figure S11. Relationships between census-tract-based measures in the State of California (2010).

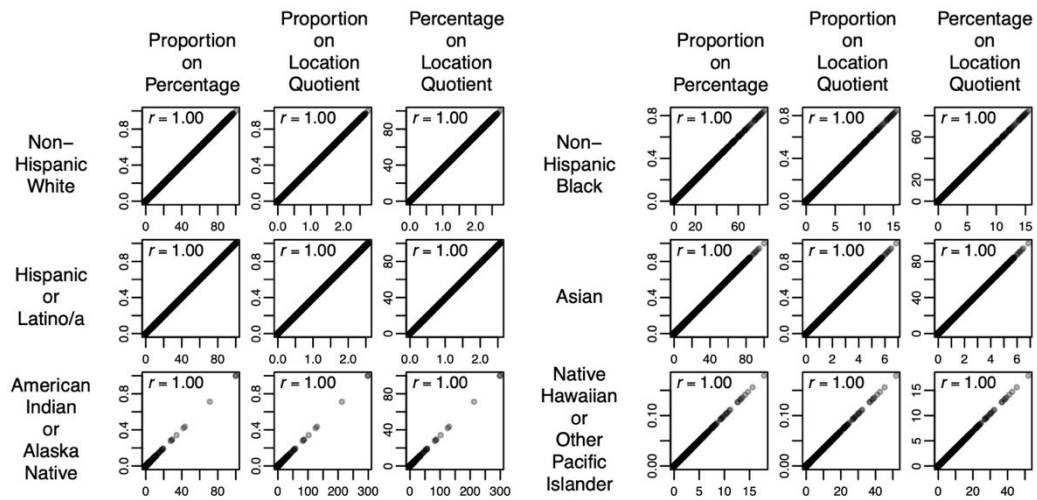

Figure S12. Relationships between census-tract-based measures in the State of California (2020).

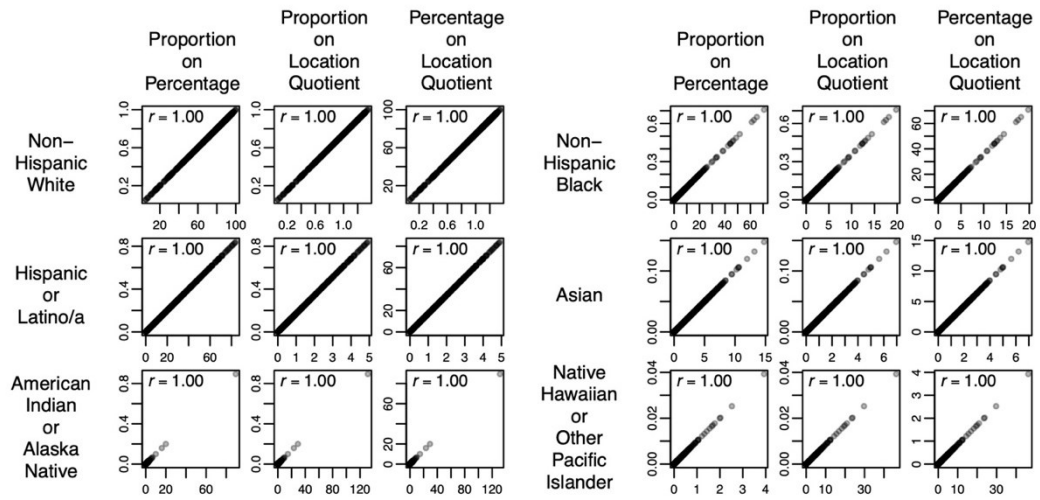

Figure S13. Relationships between census-tract-based measures in the State of Colorado (2000).

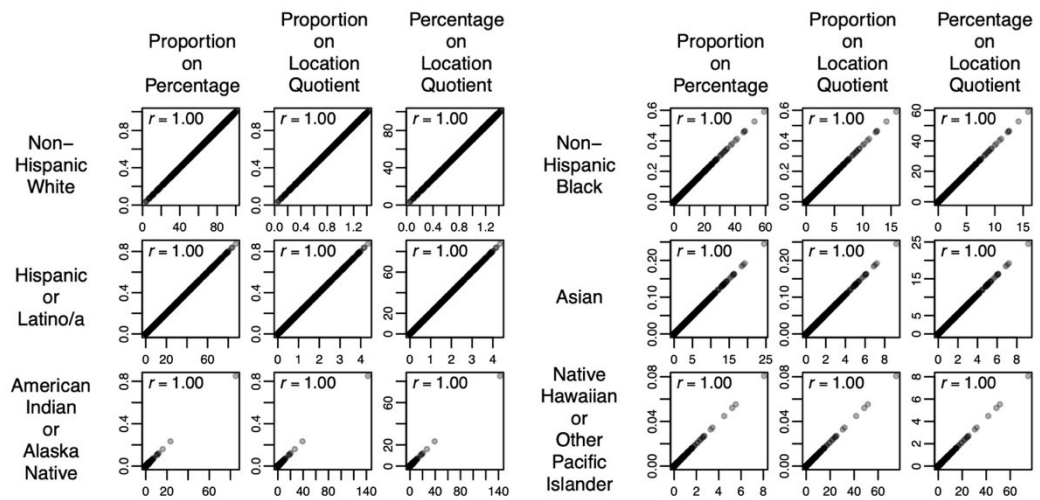

Figure S14. Relationships between census-tract-based measures in the State of Colorado (2010).

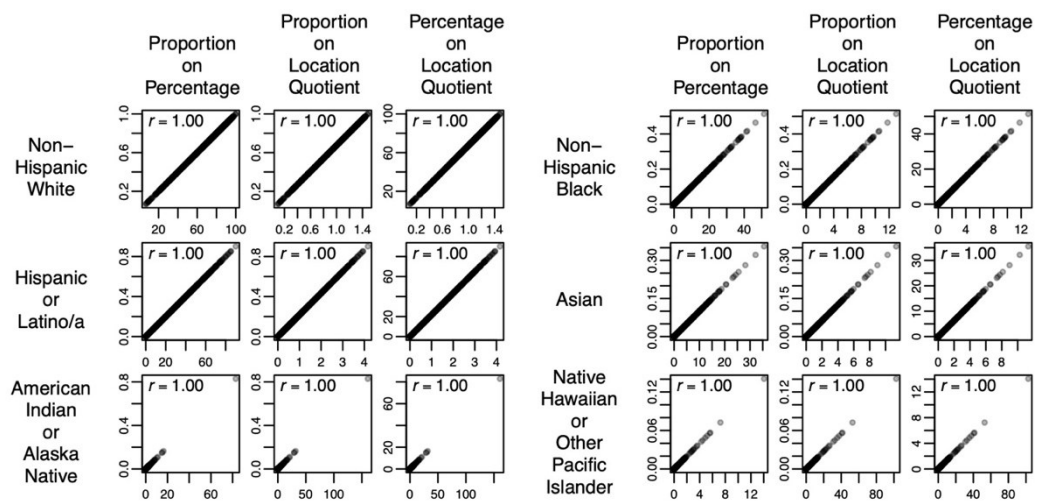

Figure S15. Relationships between census-tract-based measures in the State of Colorado (2020).

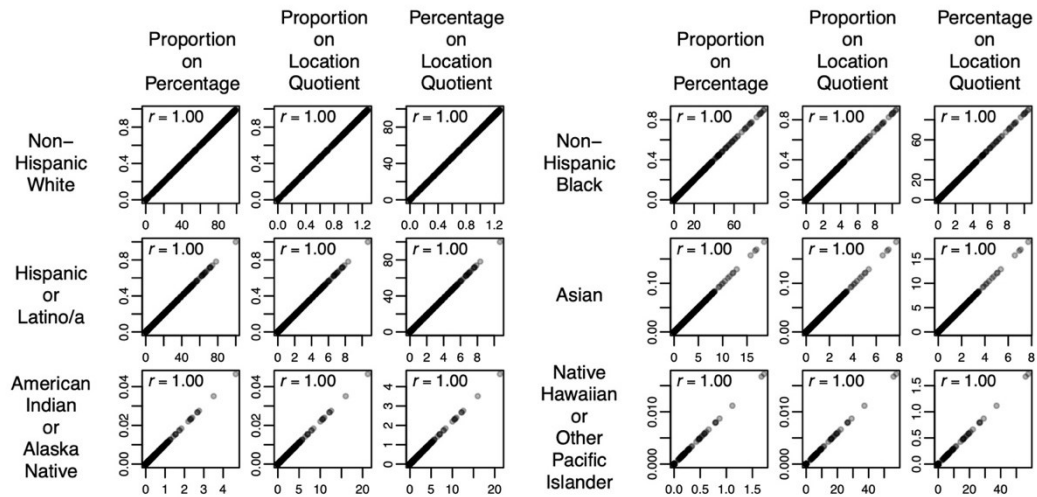

Figure S16. Relationships between census-tract-based measures in the State of Connecticut (2000).

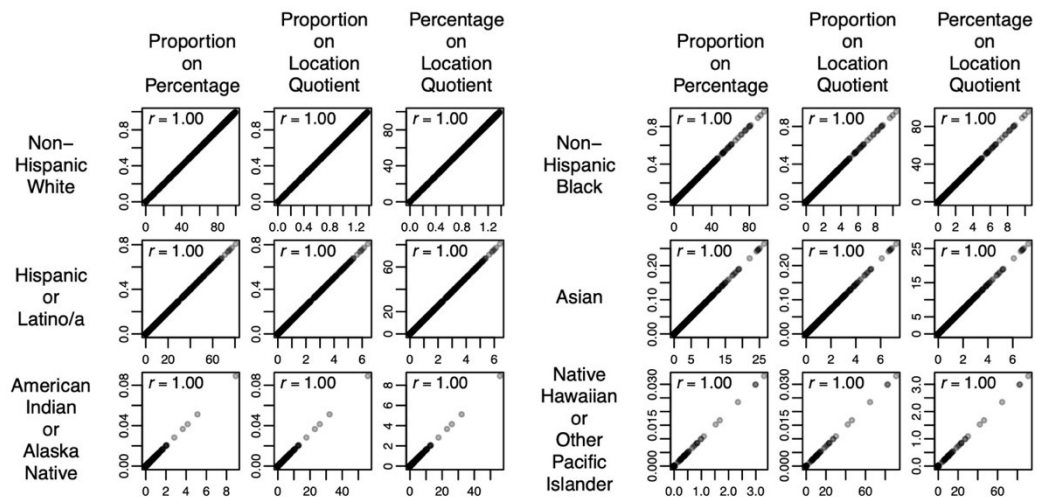

Figure S17. Relationships between census-tract-based measures in the State of Connecticut (2010).

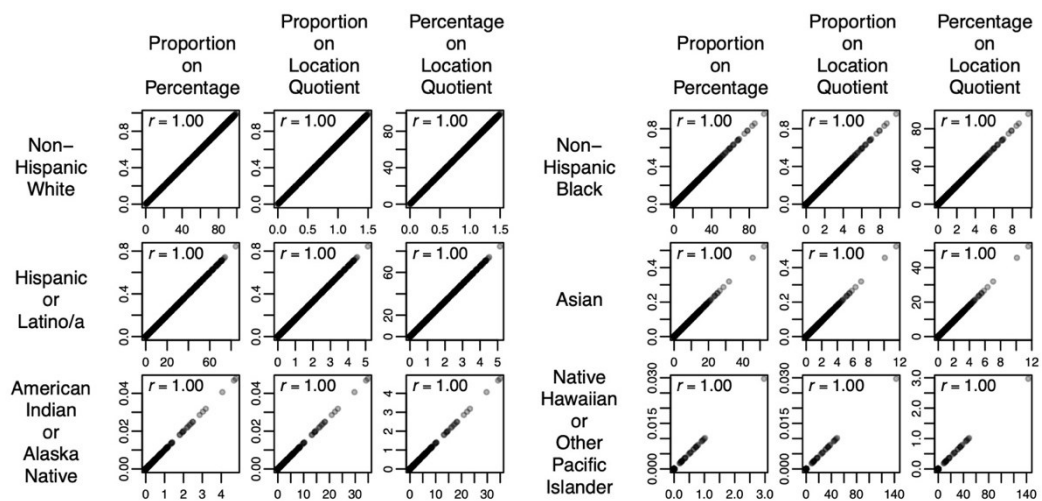

Figure S18. Relationships between census-tract-based measures in the State of Connecticut (2020).

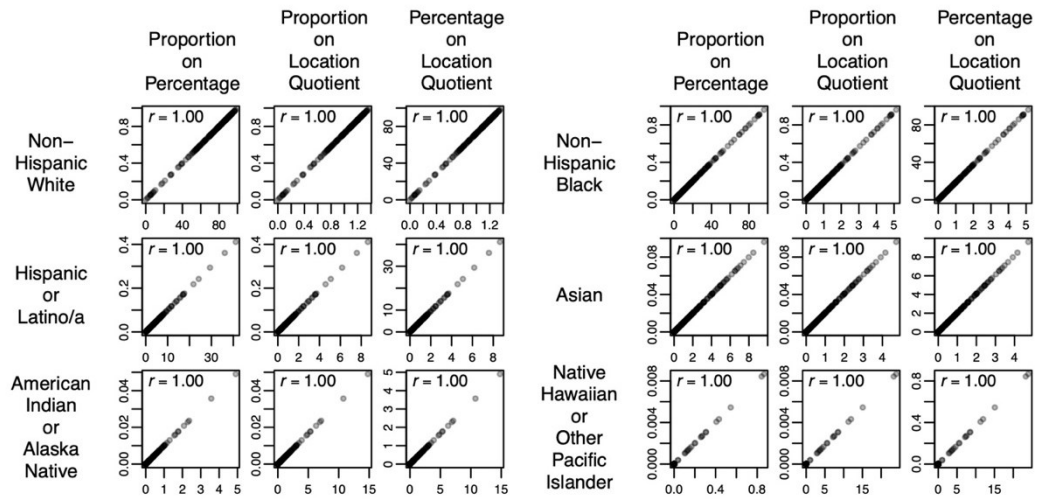

Figure S19. Relationships between census-tract-based measures in the State of Delaware (2000).

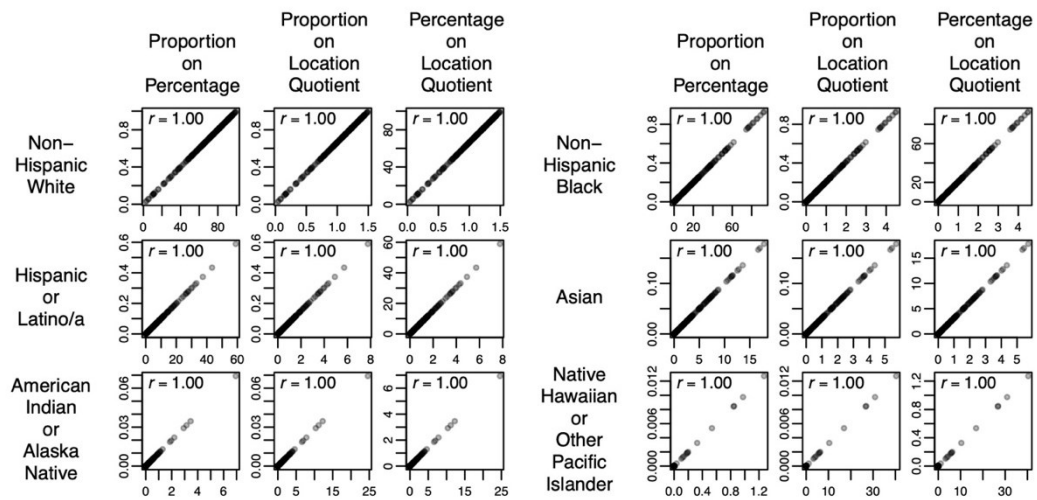

Figure S20. Relationships between census-tract-based measures in the State of Delaware (2010).

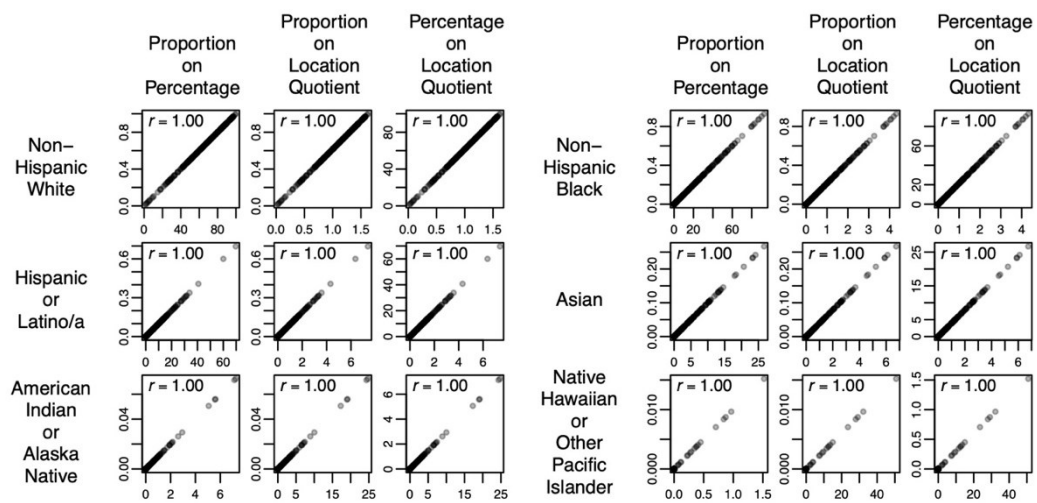

Figure S21. Relationships between census-tract-based measures in the State of Delaware (2020).

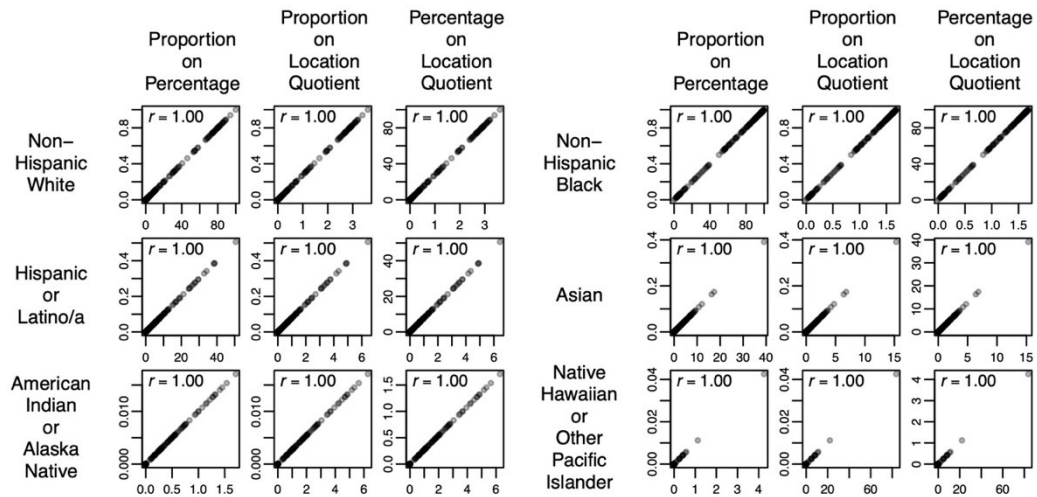

Figure S22. Relationships between census-tract-based measures in the District of Columbia (2000).

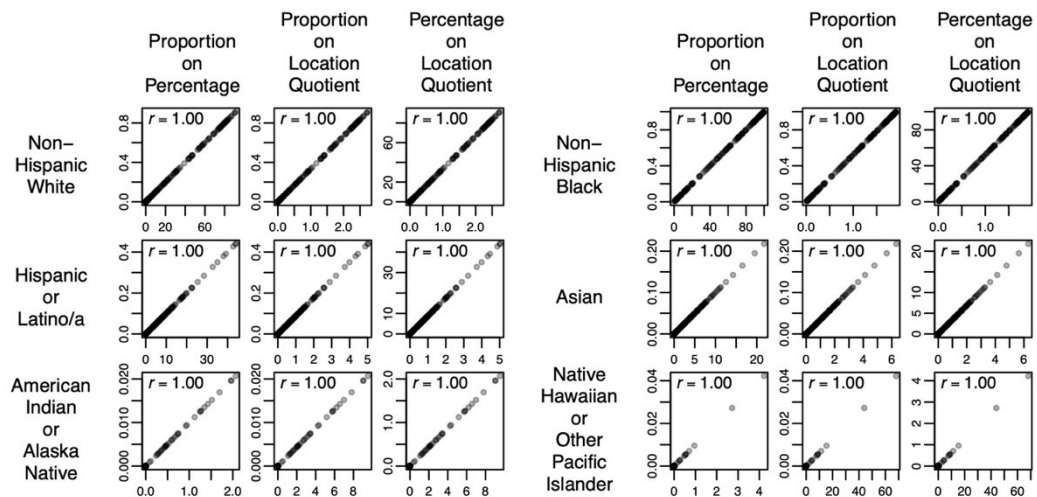

Figure S23. Relationships between census-tract-based measures in the District of Columbia (2010).

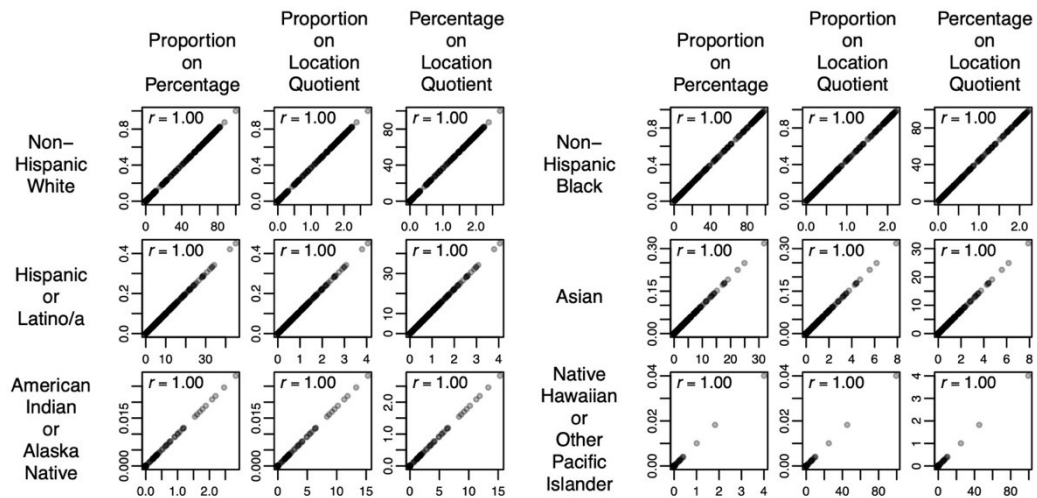

Figure S24. Relationships between census-tract-based measures in the District of Columbia (2020).

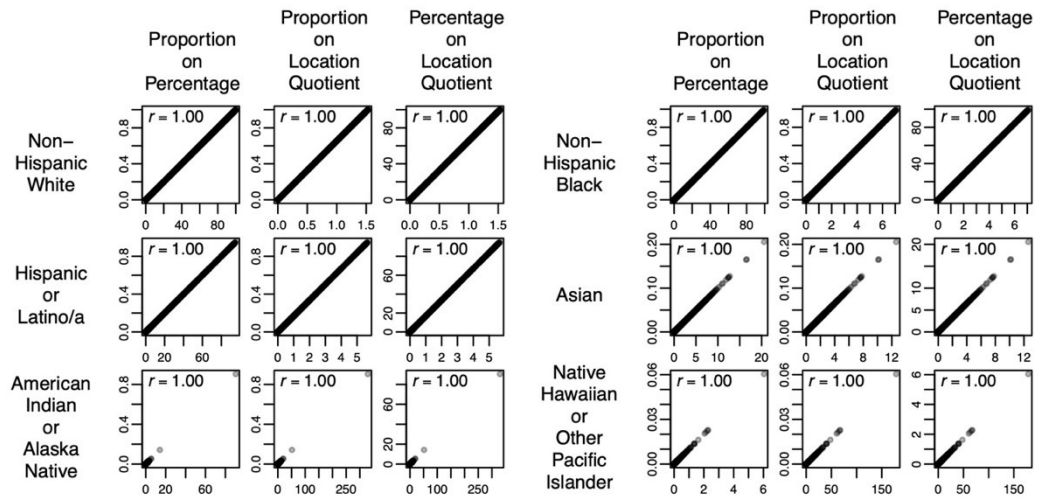

Figure S25. Relationships between census-tract-based measures in the State of Florida (2000).

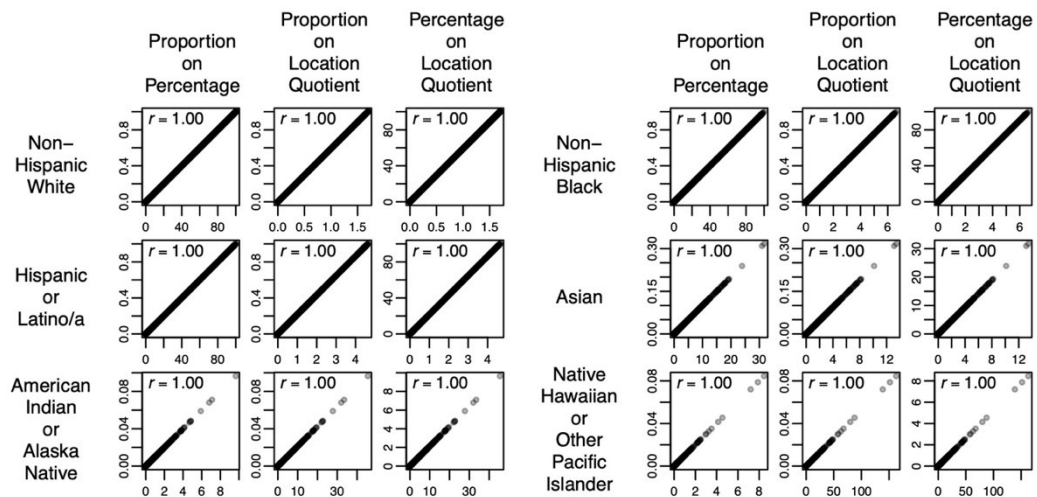

Figure S26. Relationships between census-tract-based measures in the State of Florida (2010).

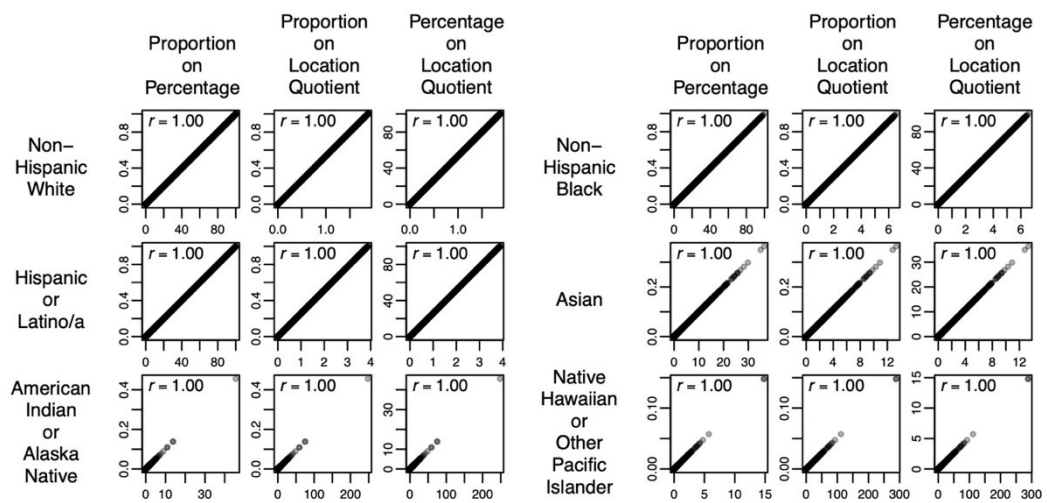

Figure S27. Relationships between census-tract-based measures in the State of Florida (2020).

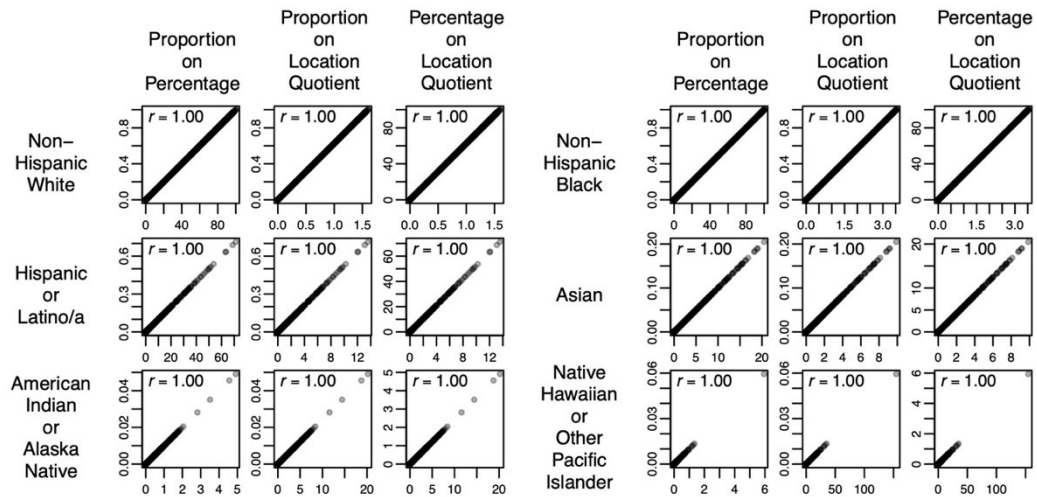

Figure S28. Relationships between census-tract-based measures in the State of Georgia (2000).

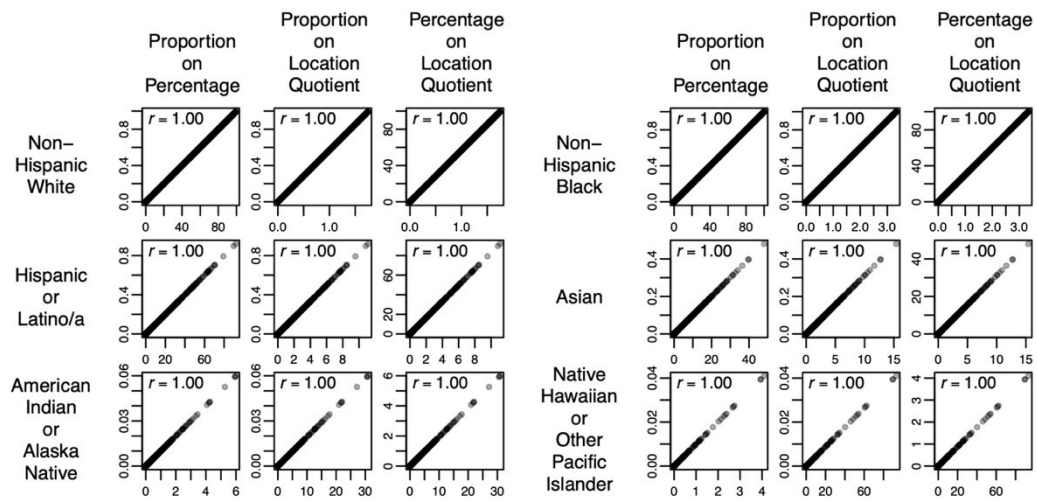

Figure S29. Relationships between census-tract-based measures in the State of Georgia (2010).

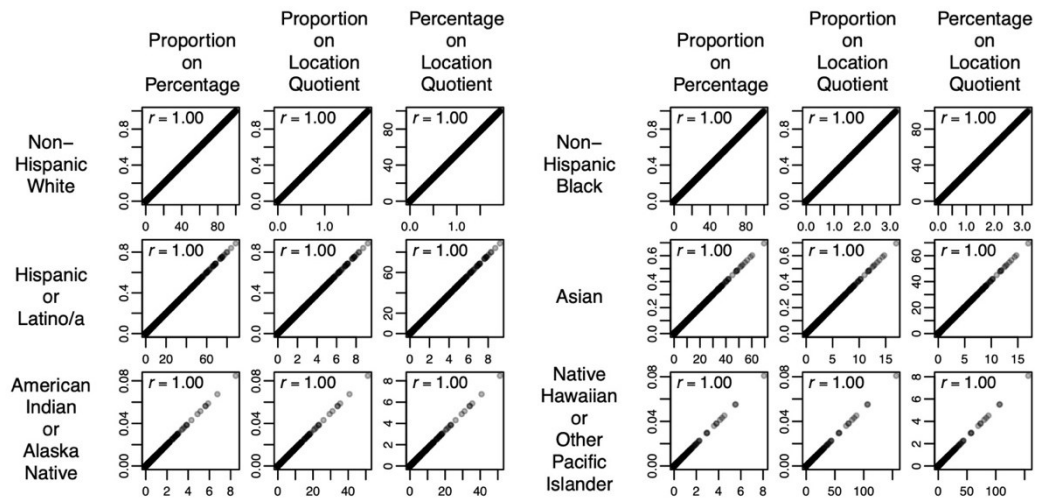

Figure S30. Relationships between census-tract-based measures in the State of Georgia (2020).

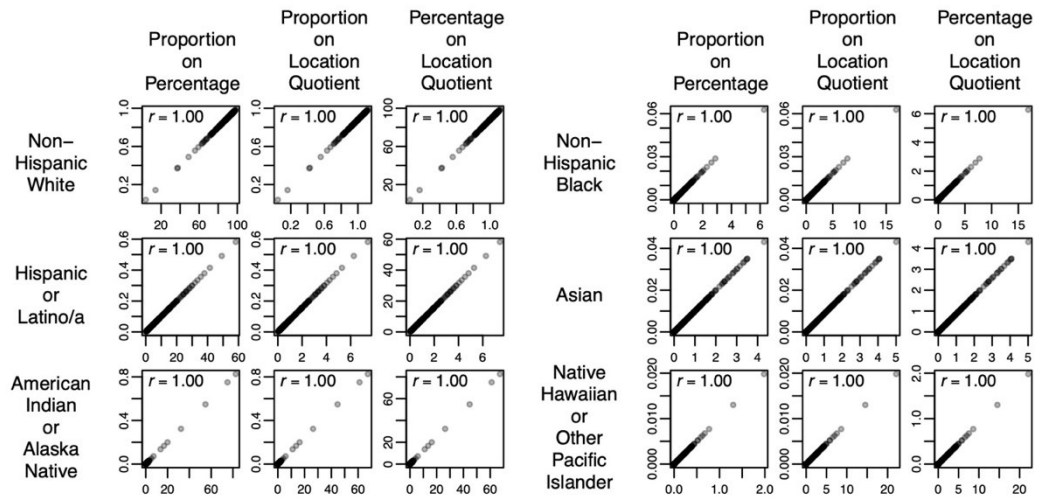

Figure S31. Relationships between census-tract-based measures in the State of Idaho (2000).

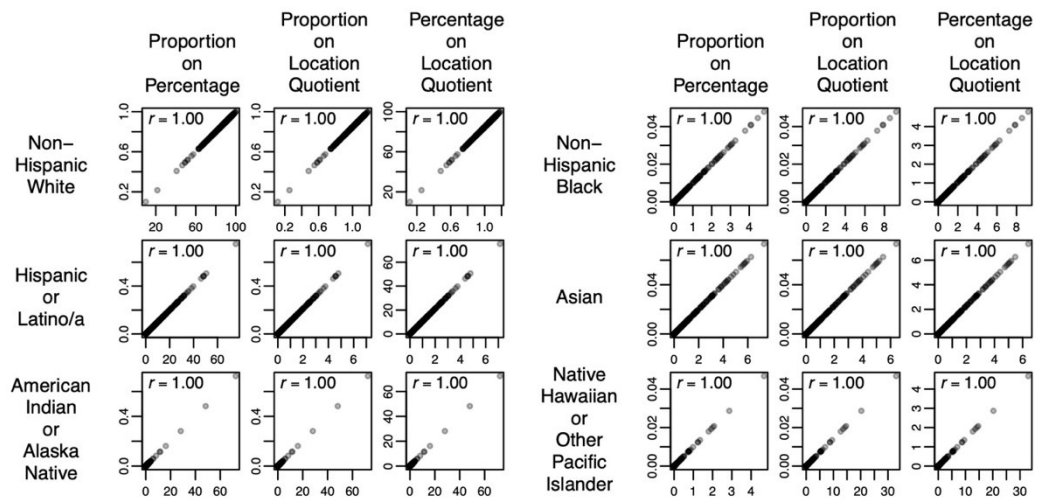

Figure S32. Relationships between census-tract-based measures in the State of Idaho (2010).

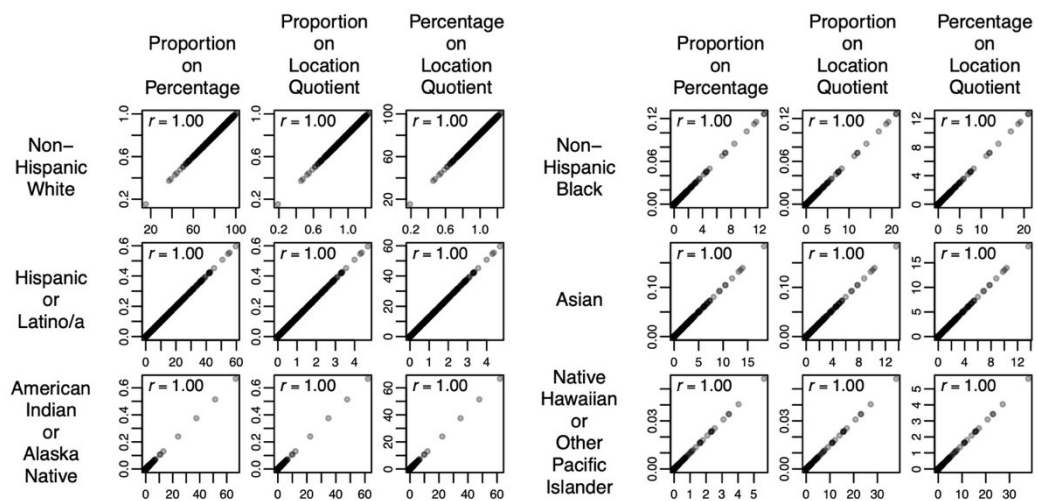

Figure S33. Relationships between census-tract-based measures in the State of Idaho (2020).

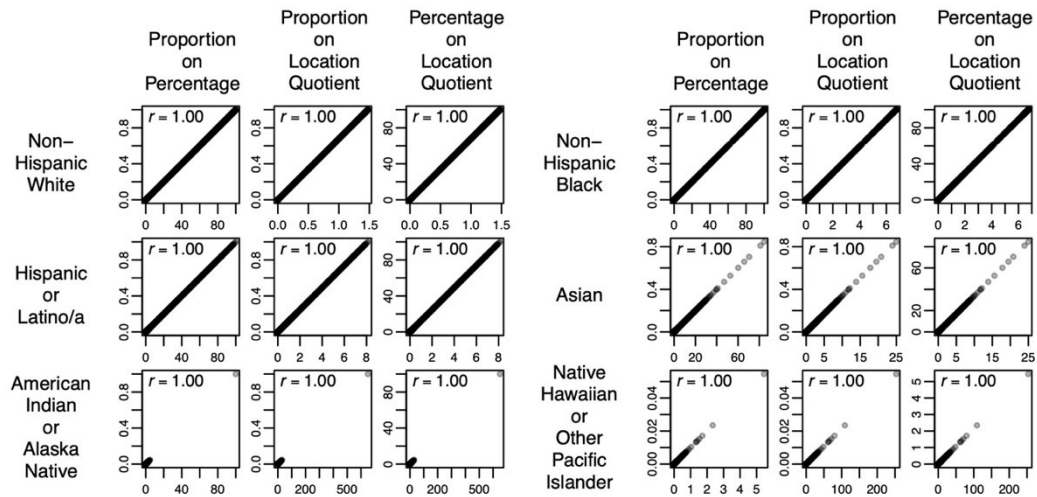

Figure S34. Relationships between census-tract-based measures in the State of Illinois (2000).

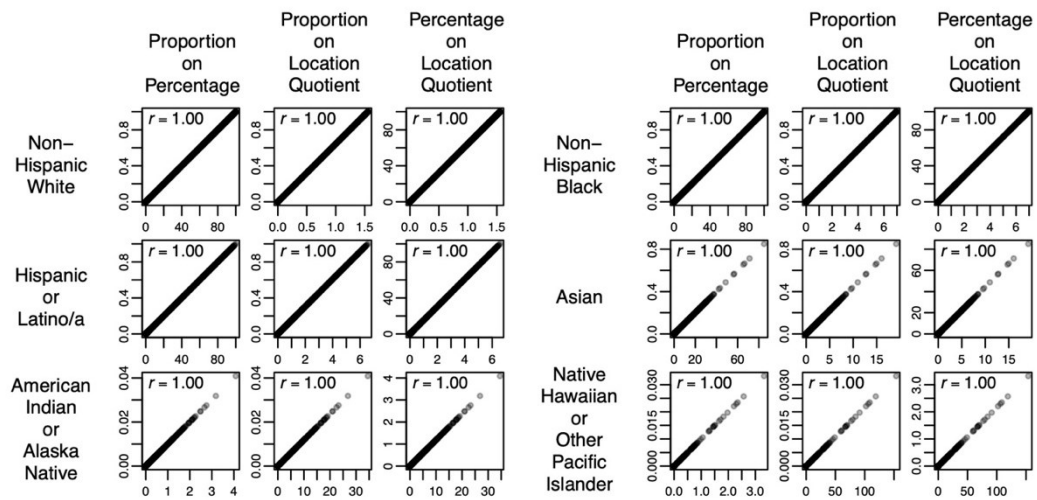

Figure S35. Relationships between census-tract-based measures in the State of Illinois (2010).

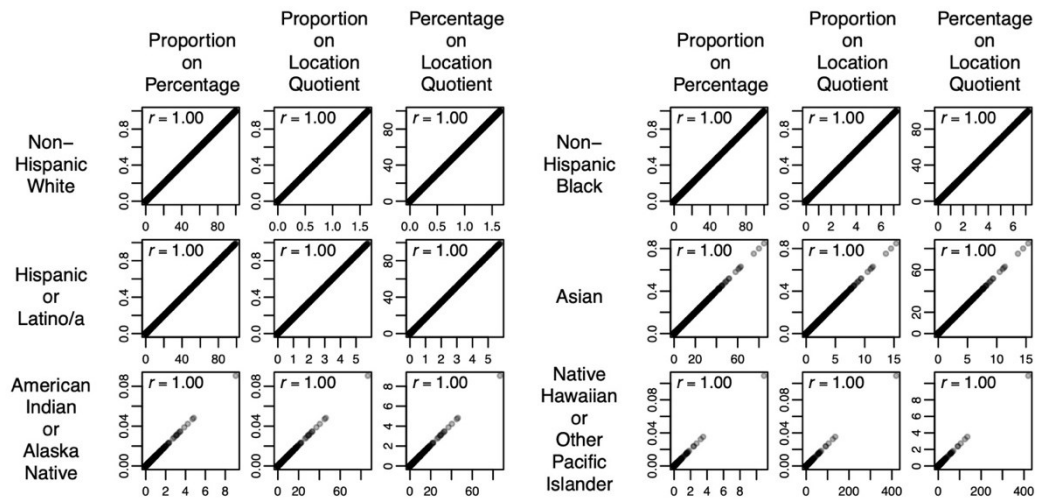

Figure S36. Relationships between census-tract-based measures in the State of Illinois (2020).

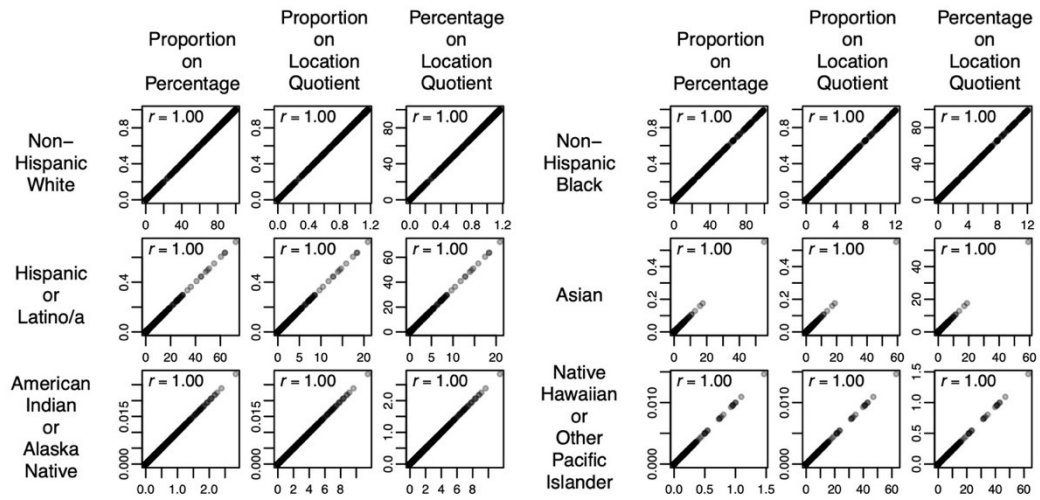

Figure S37. Relationships between census-tract-based measures in the State of Indiana (2000).

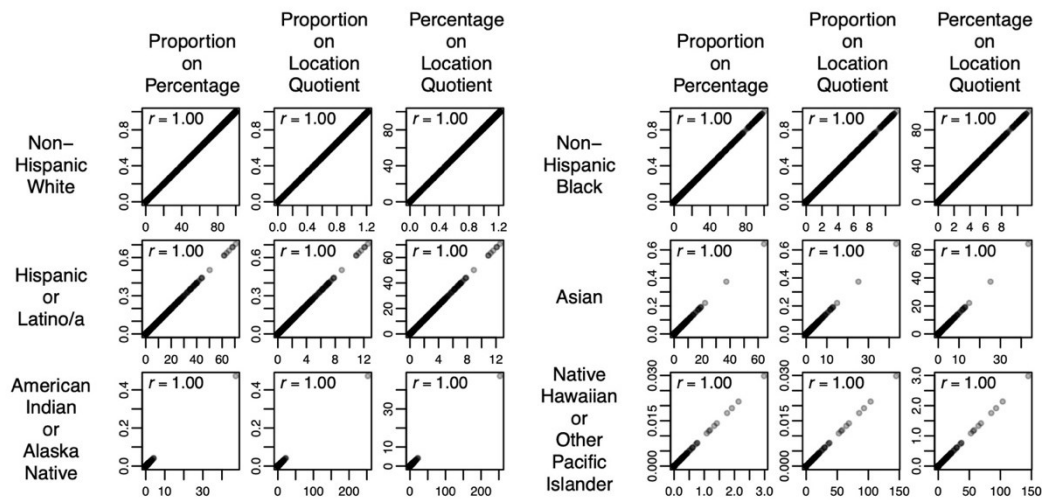

Figure S38. Relationships between census-tract-based measures in the State of Indiana (2010).

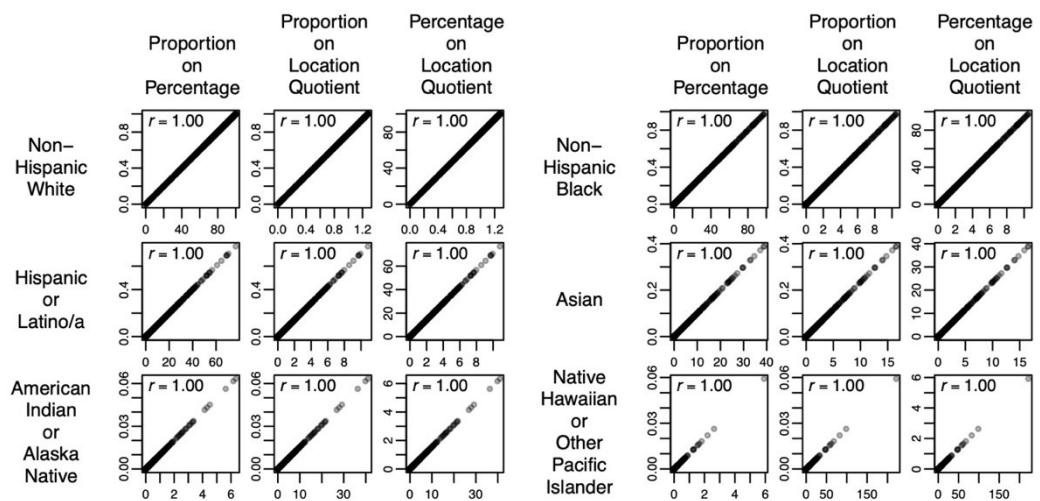

Figure S39. Relationships between census-tract-based measures in the State of Indiana (2020).

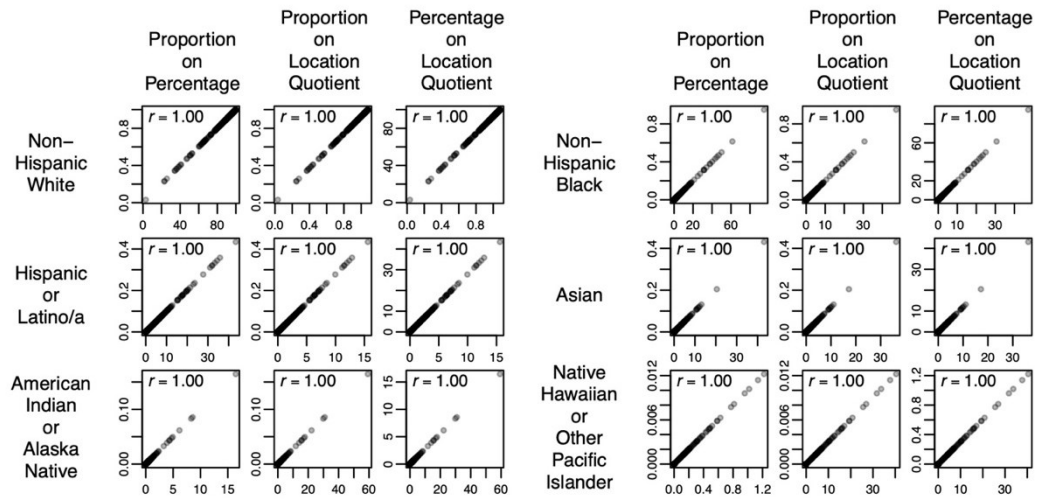

Figure S40. Relationships between census-tract-based measures in the State of Iowa (2000).

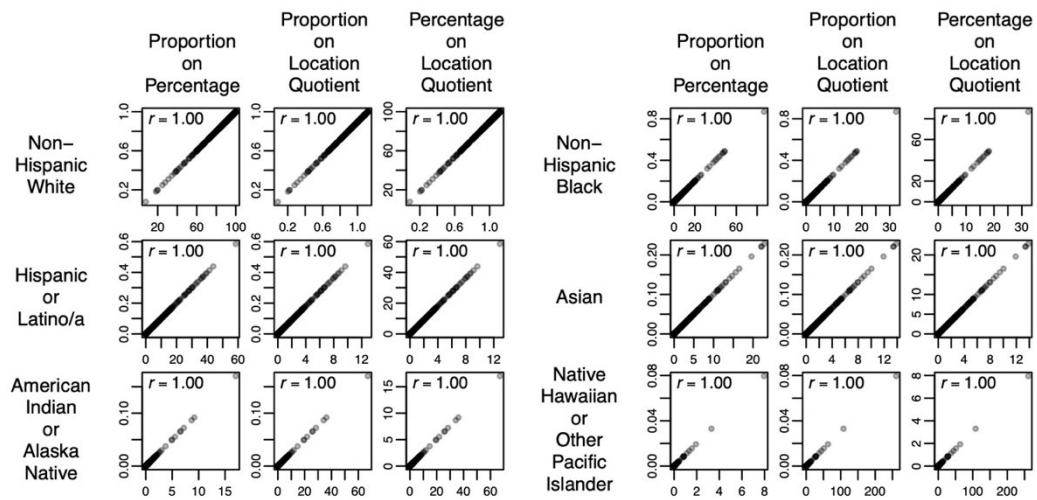

Figure S41. Relationships between census-tract-based measures in the State of Iowa (2010).

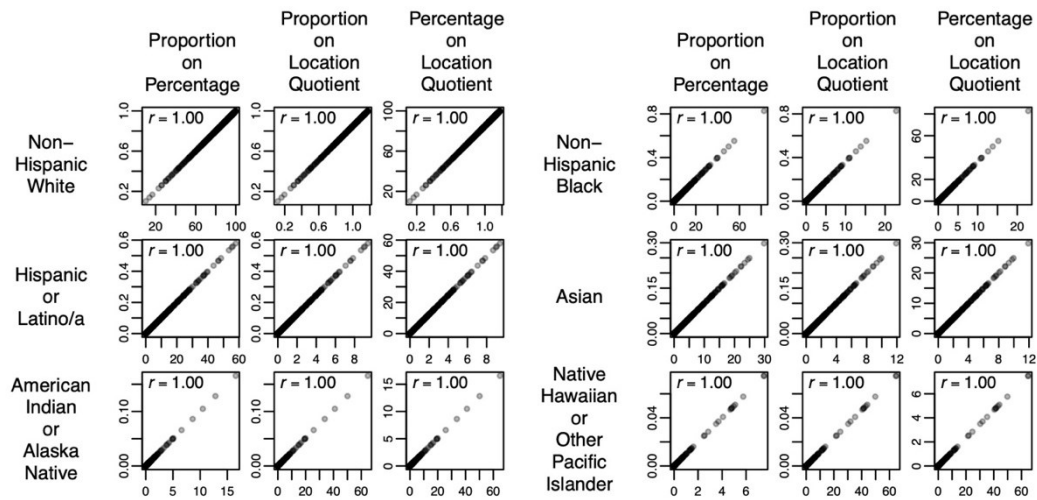

Figure S42. Relationships between census-tract-based measures in the State of Iowa (2020).

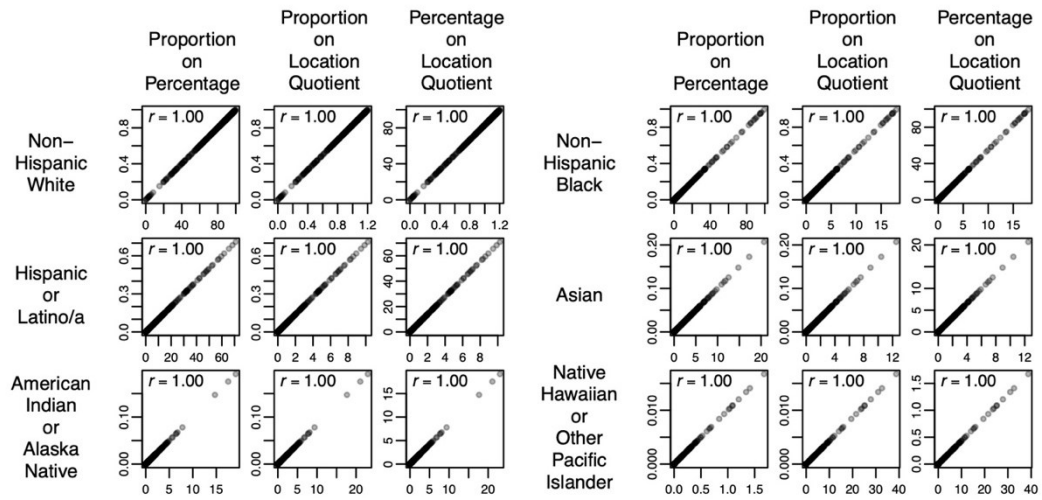

Figure S43. Relationships between census-tract-based measures in the State of Kansas (2000).

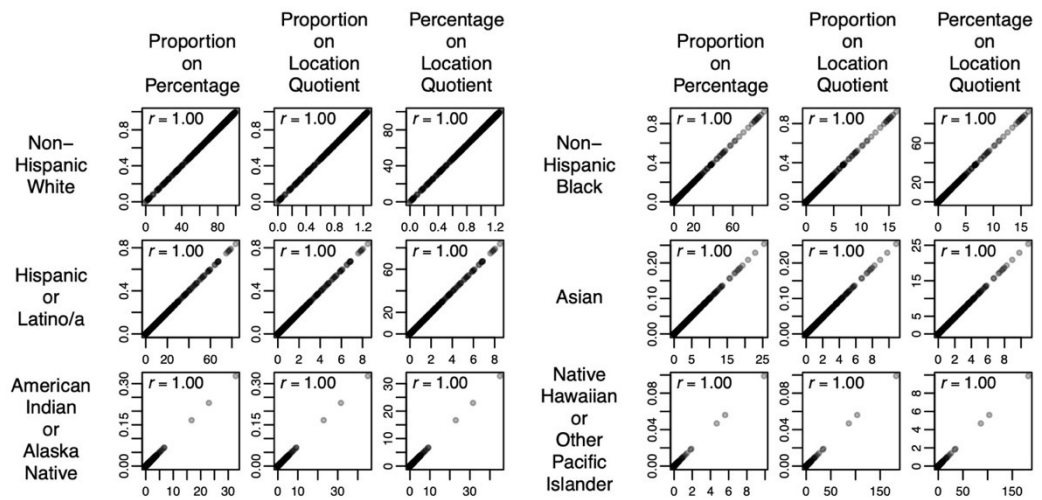

Figure S44. Relationships between census-tract-based measures in the State of Kansas (2010).

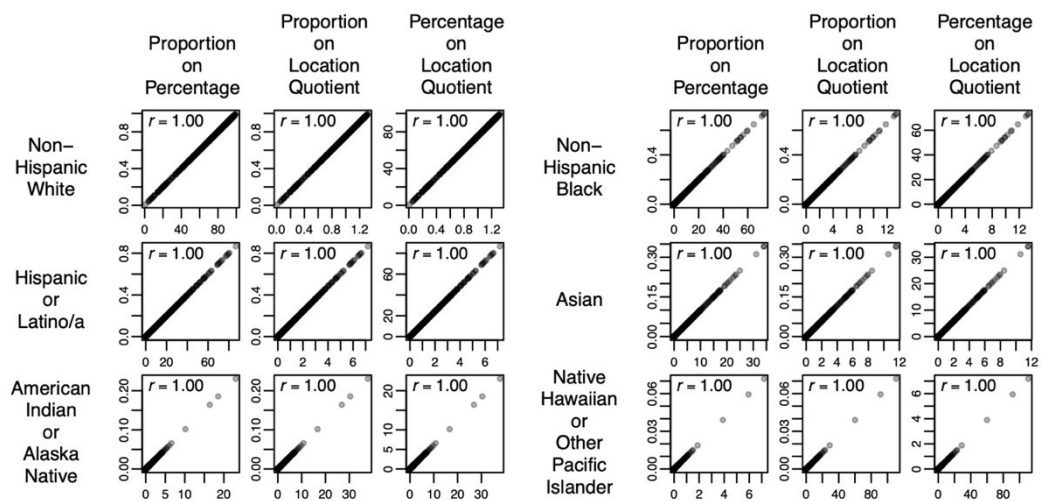

Figure S45. Relationships between census-tract-based measures in the State of Kansas (2020).

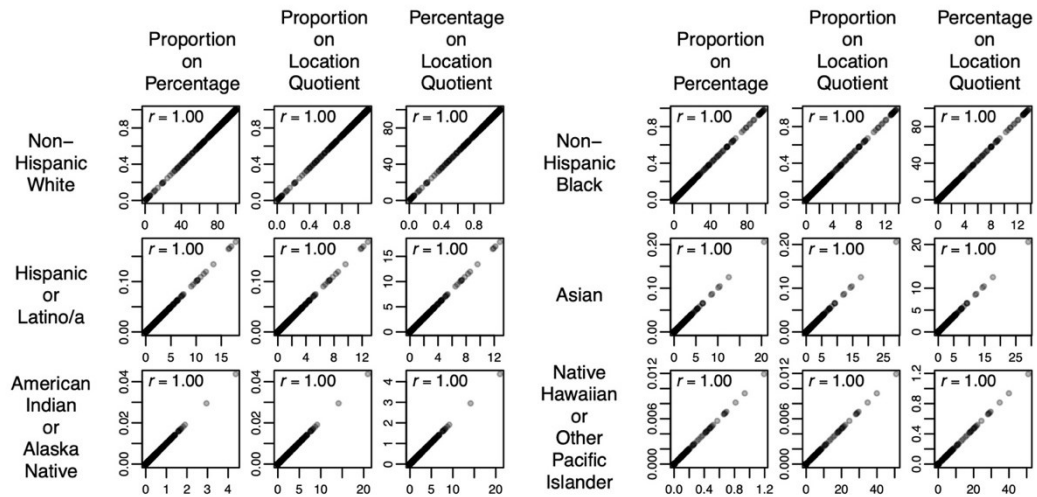

Figure S46. Relationships between census-tract-based measures in the State of Kentucky (2000).

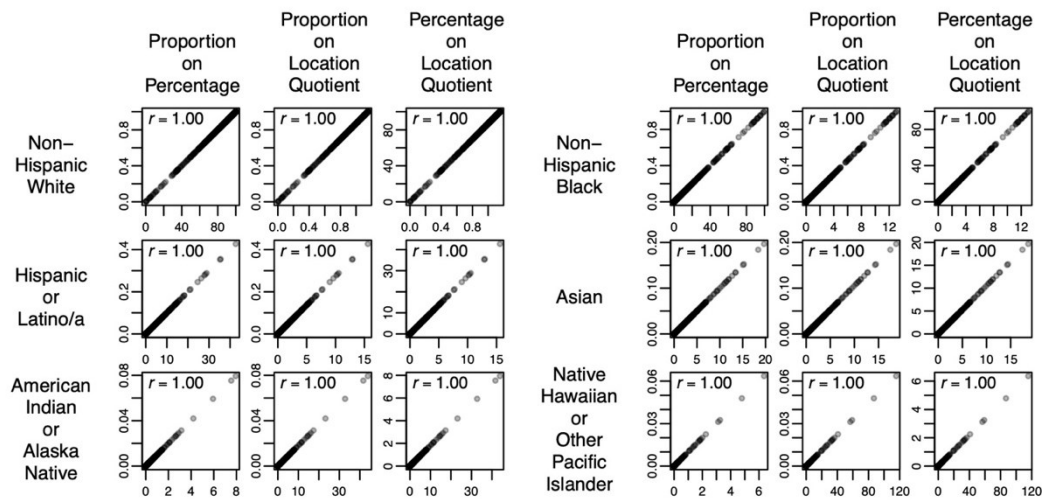

Figure S47. Relationships between census-tract-based measures in the State of Kentucky (2010).

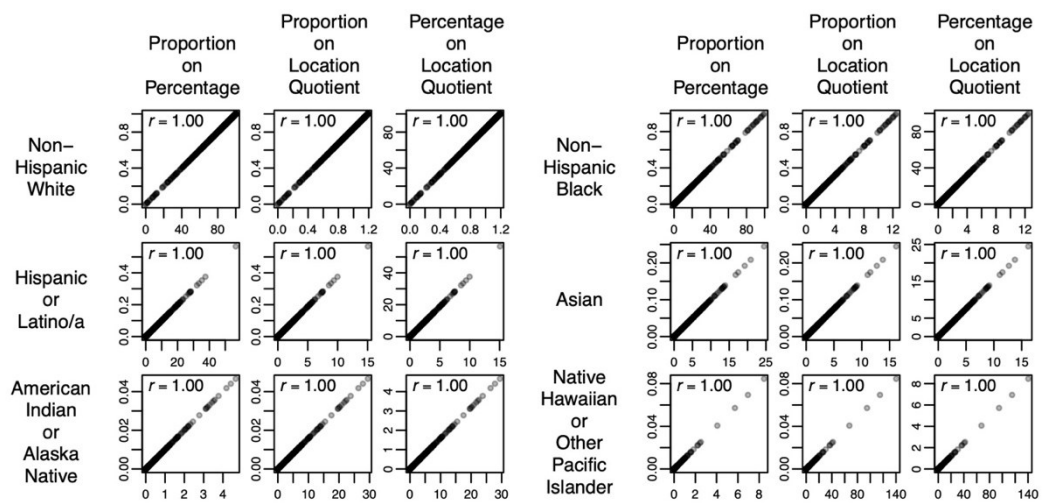

Figure S48. Relationships between census-tract-based measures in the State of Kentucky (2020).

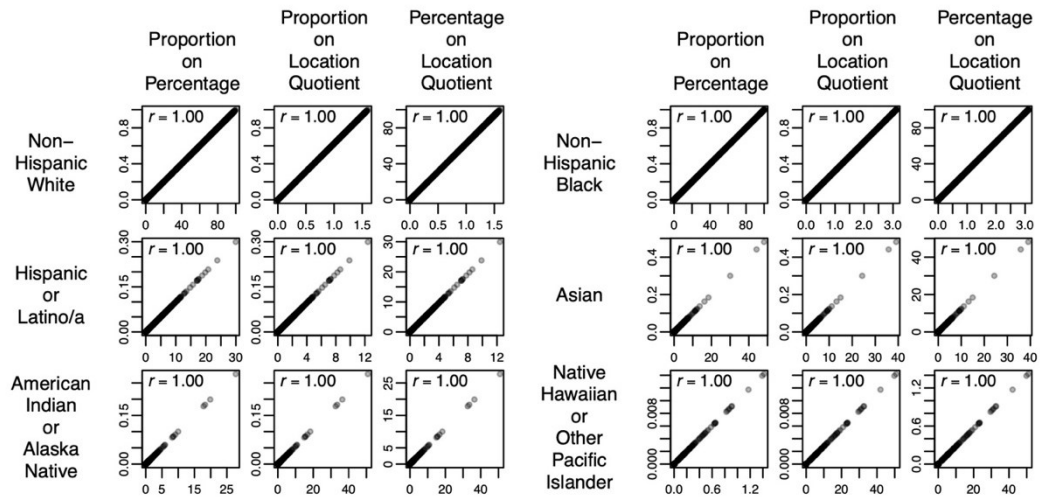

Figure S49. Relationships between census-tract-based measures in the State of Louisiana (2000).

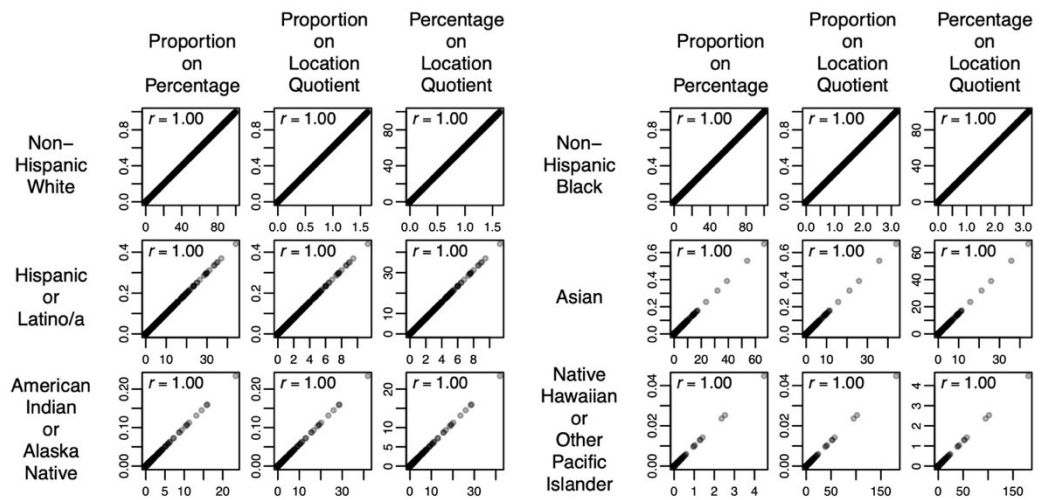

Figure S50. Relationships between census-tract-based measures in the State of Louisiana (2010).

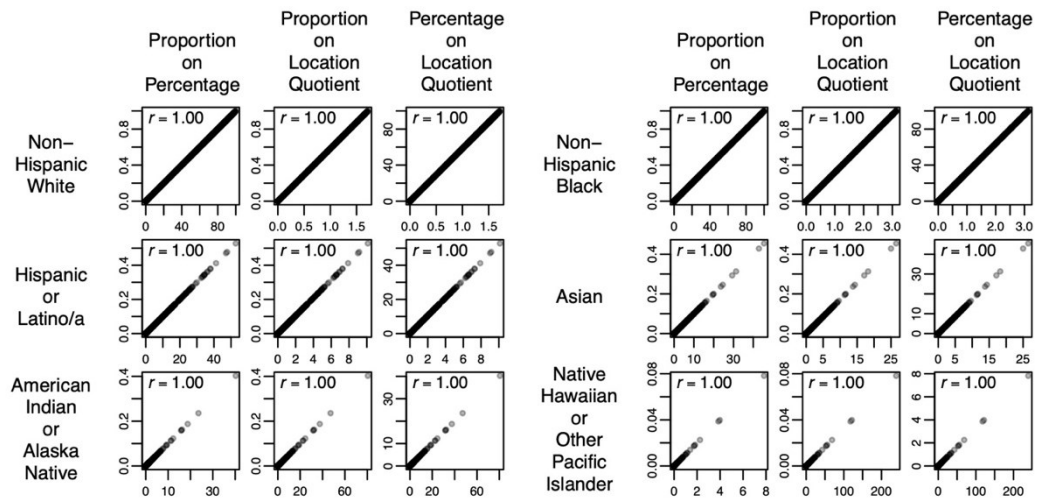

Figure S51. Relationships between census-tract-based measures in the State of Louisiana (2020).

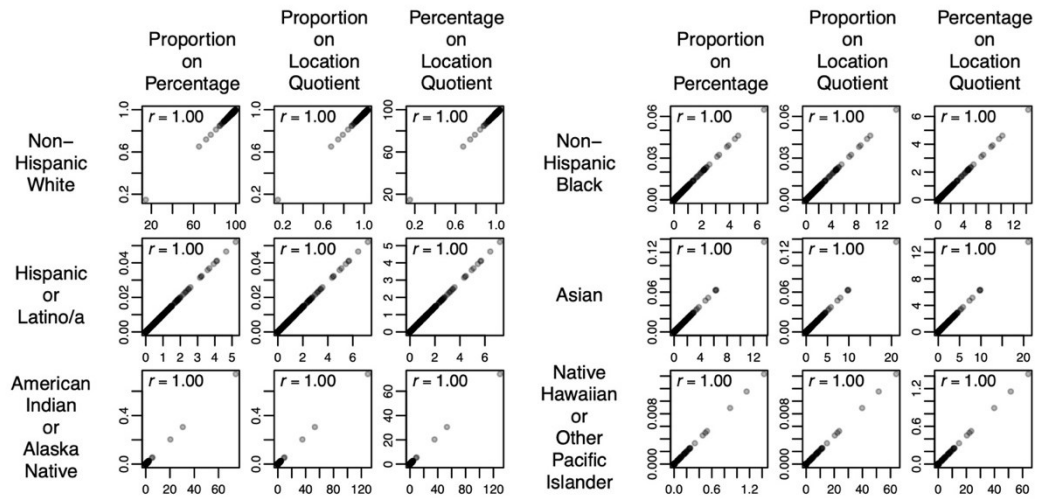

Figure S52. Relationships between census-tract-based measures in the State of Maine (2000).

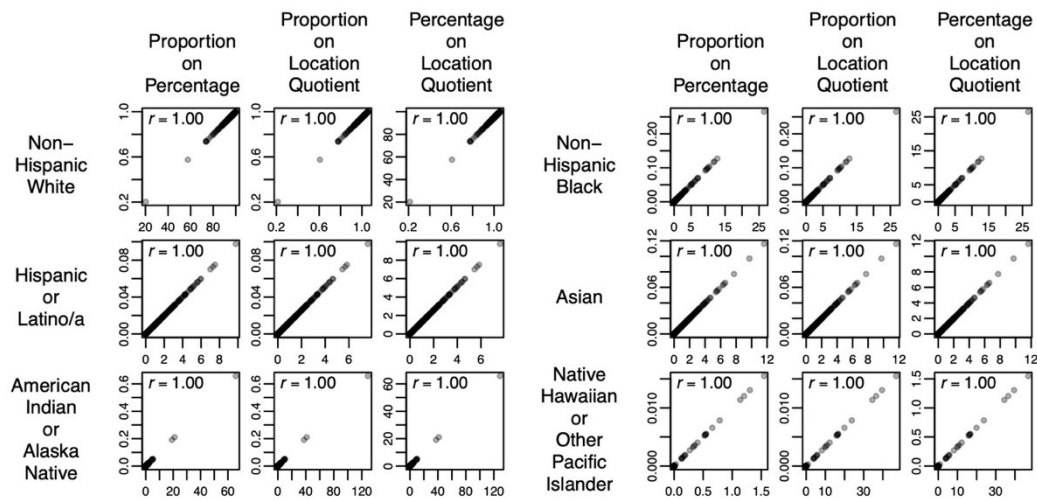

Figure S53. Relationships between census-tract-based measures in the State of Maine (2010).

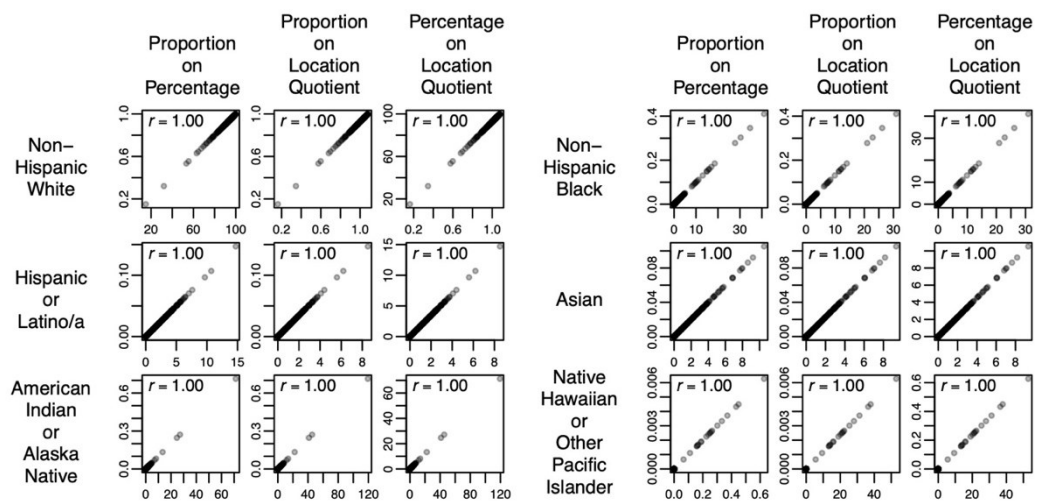

Figure S54. Relationships between census-tract-based measures in the State of Maine (2020).

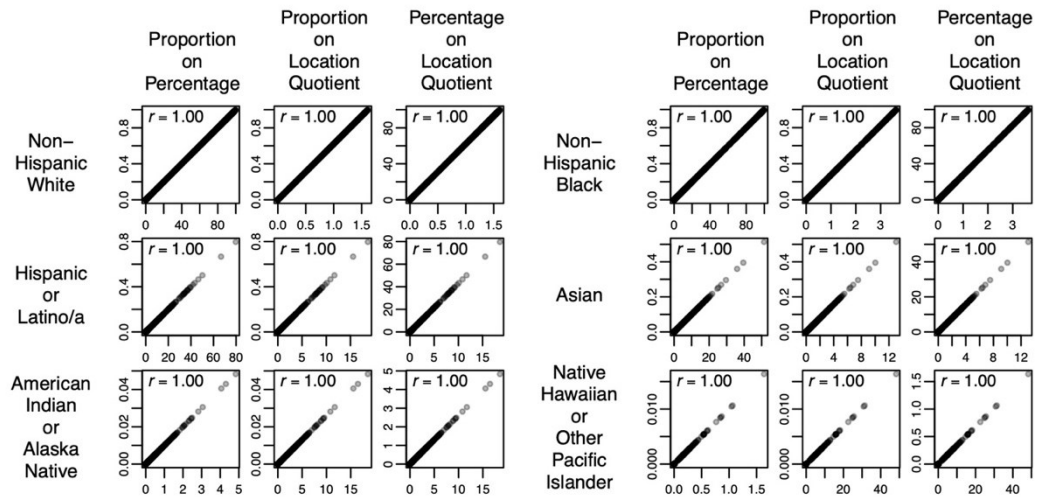

Figure S55. Relationships between census-tract-based measures in the State of Maryland (2000).

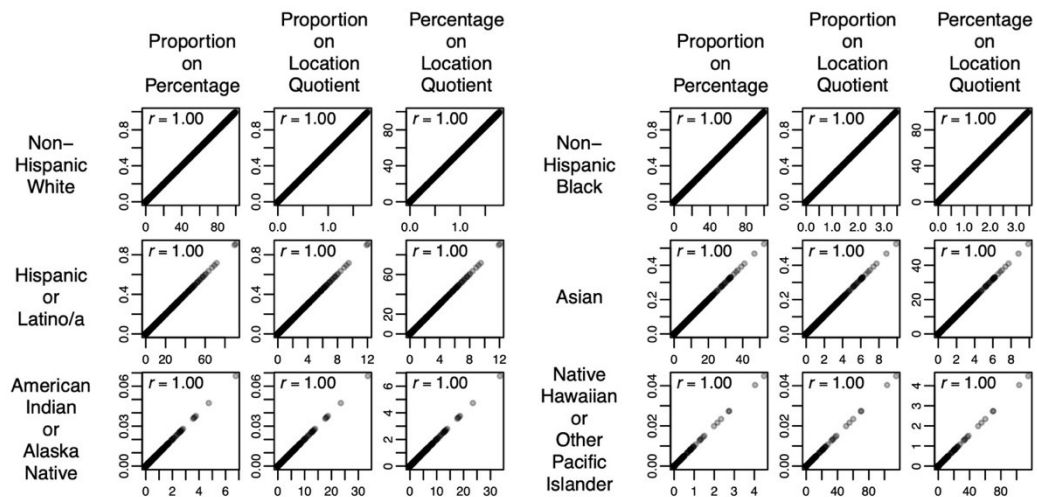

Figure S56. Relationships between census-tract-based measures in the State of Maryland (2010).

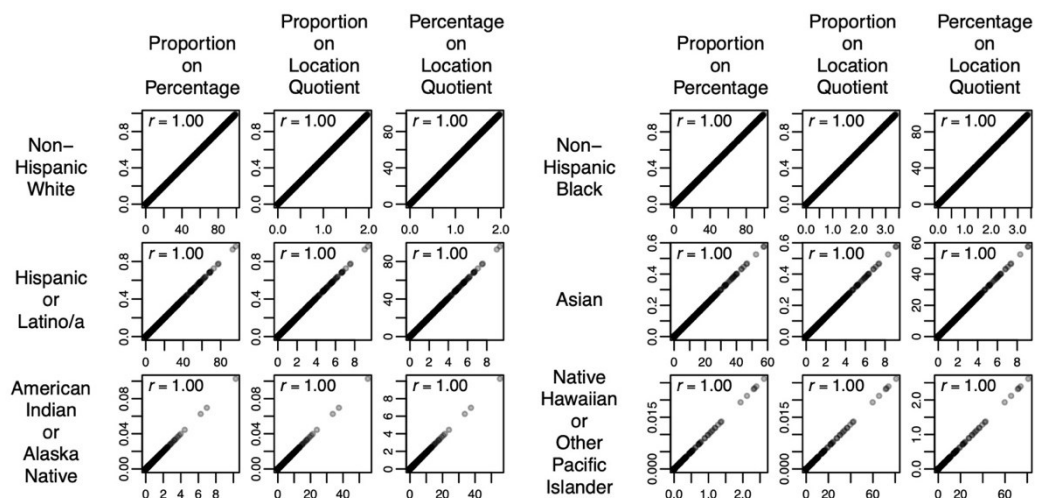

Figure S57. Relationships between census-tract-based measures in the State of Maryland (2020).

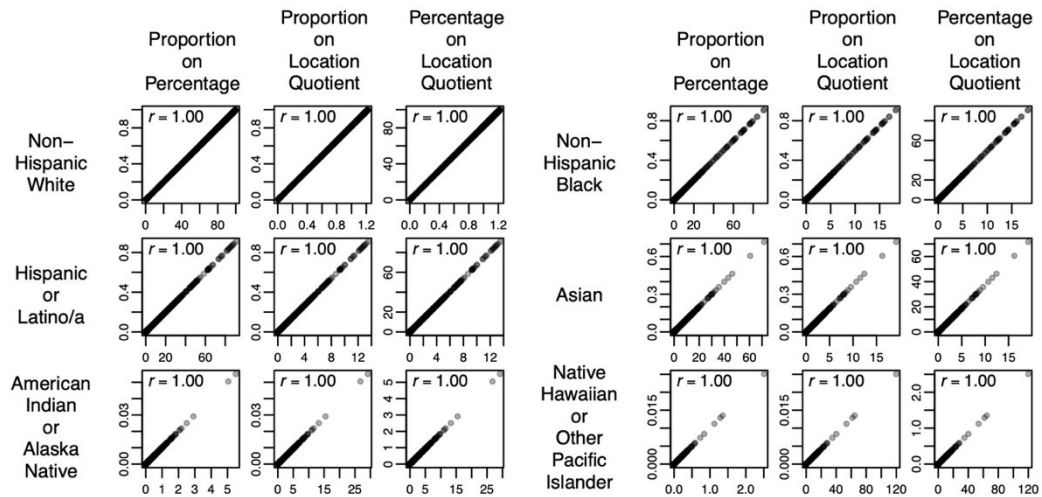

Figure S58. Relationships between census-tract-based measures in the State of Massachusetts (2000).

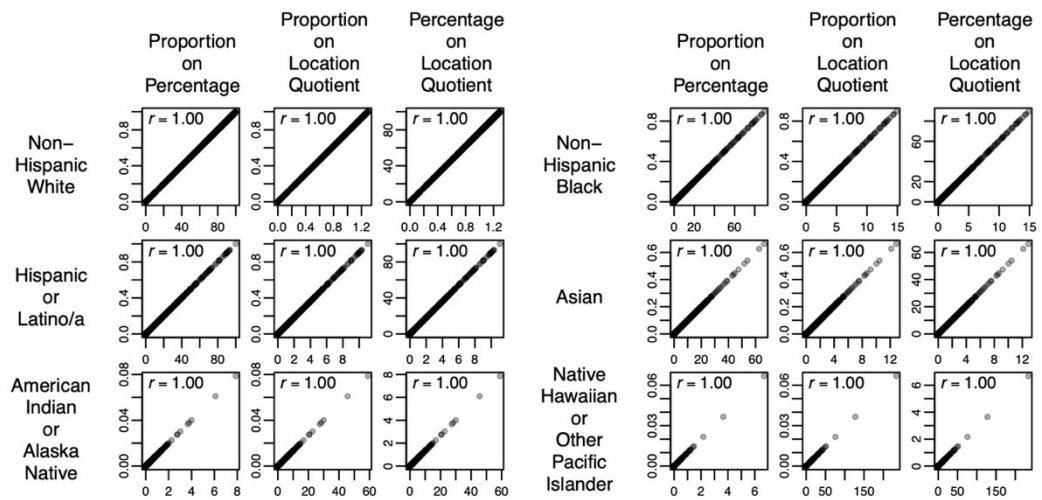

Figure S59. Relationships between census-tract-based measures in the State of Massachusetts (2010).

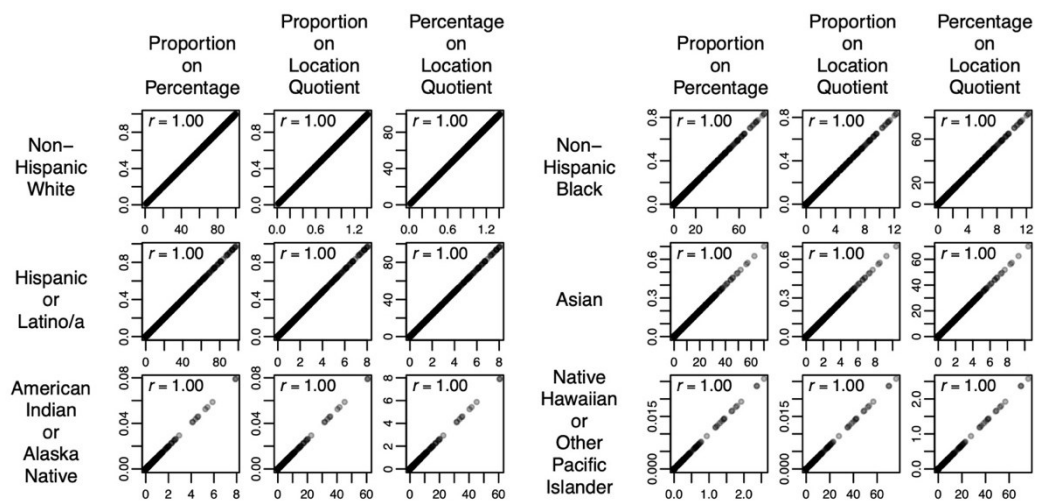

Figure S60. Relationships between census-tract-based measures in the State of Massachusetts (2020).

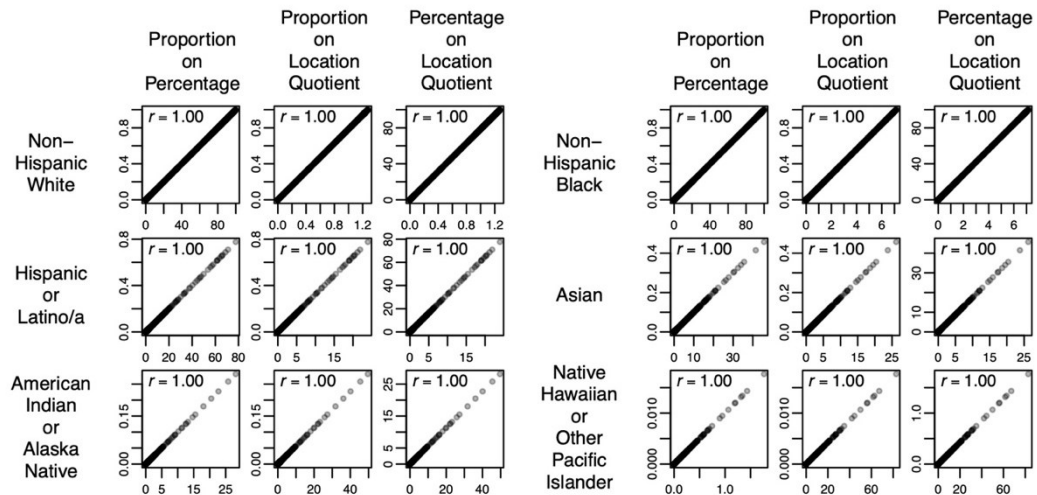

Figure S61. Relationships between census-tract-based measures in the State of Michigan (2000).

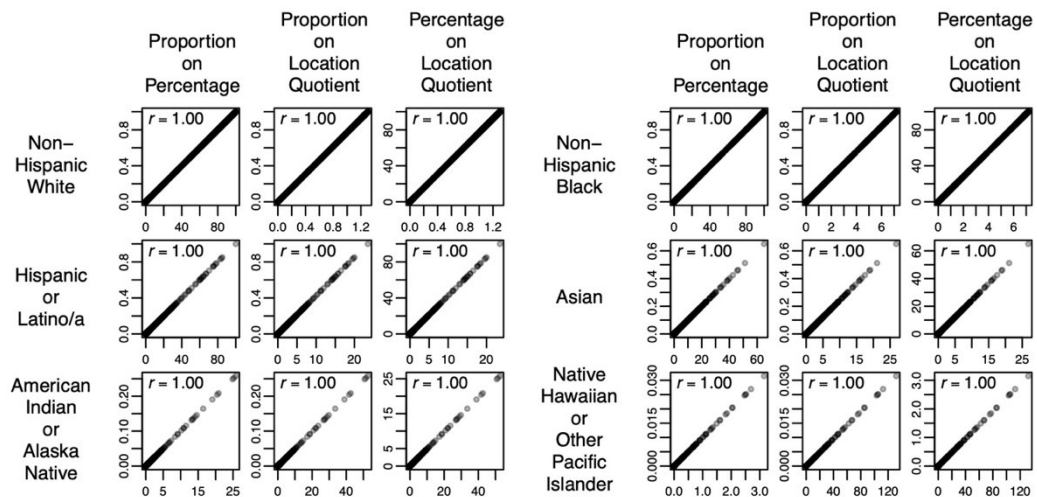

Figure S62. Relationships between census-tract-based measures in the State of Michigan (2010).

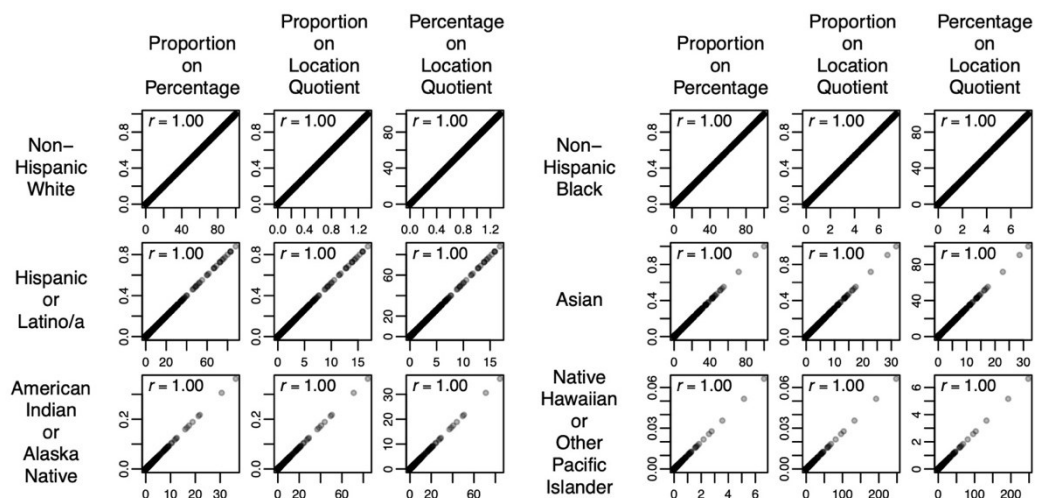

Figure S63. Relationships between census-tract-based measures in the State of Michigan (2020).

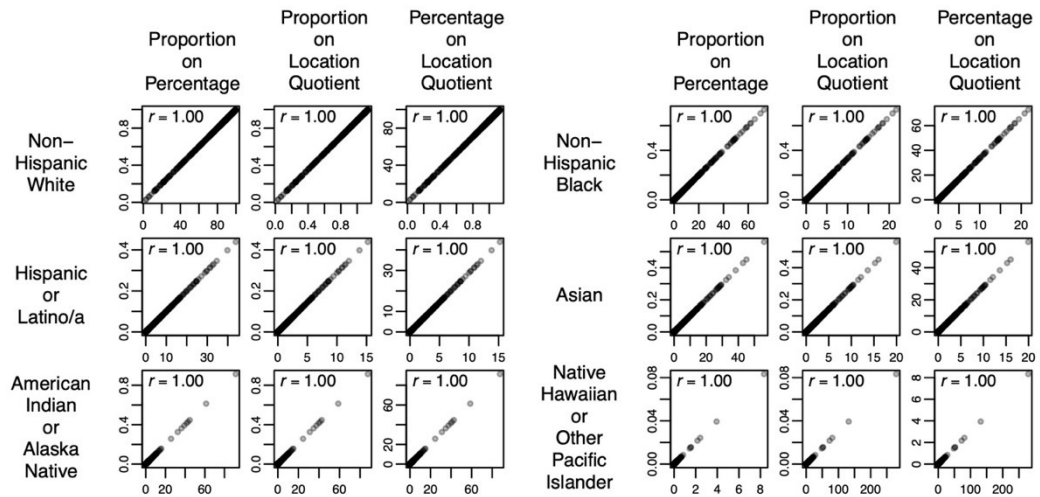

Figure S64. Relationships between census-tract-based measures in the State of Minnesota (2000).

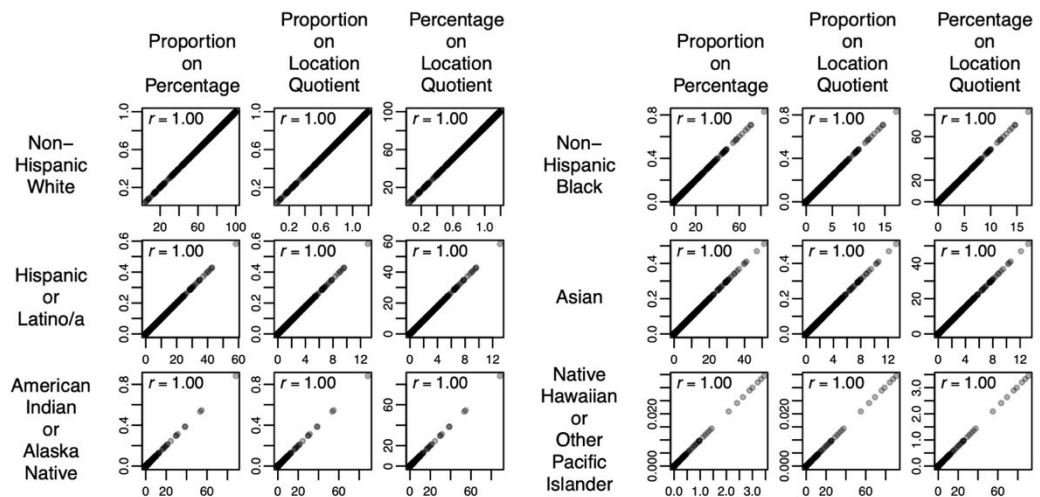

Figure S65. Relationships between census-tract-based measures in the State of Minnesota (2010).

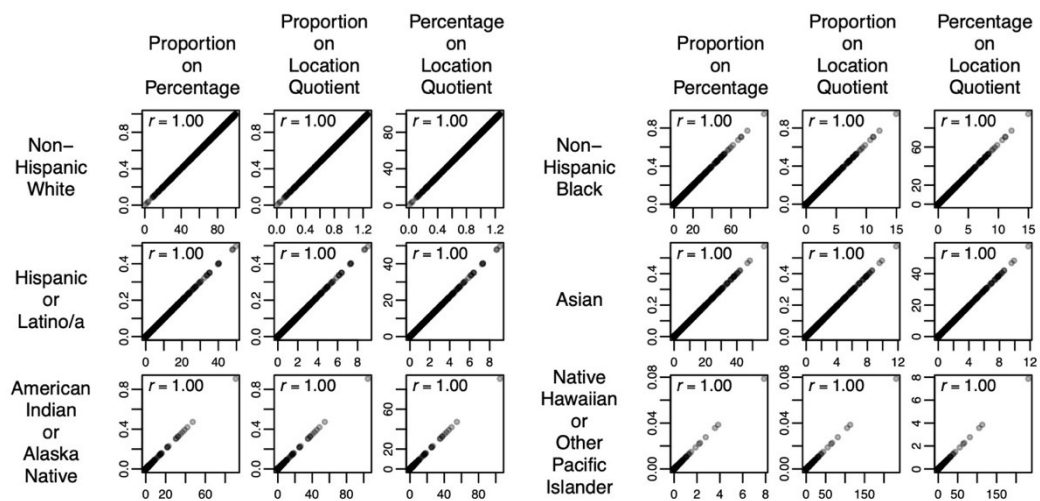

Figure S66. Relationships between census-tract-based measures in the State of Minnesota (2020).

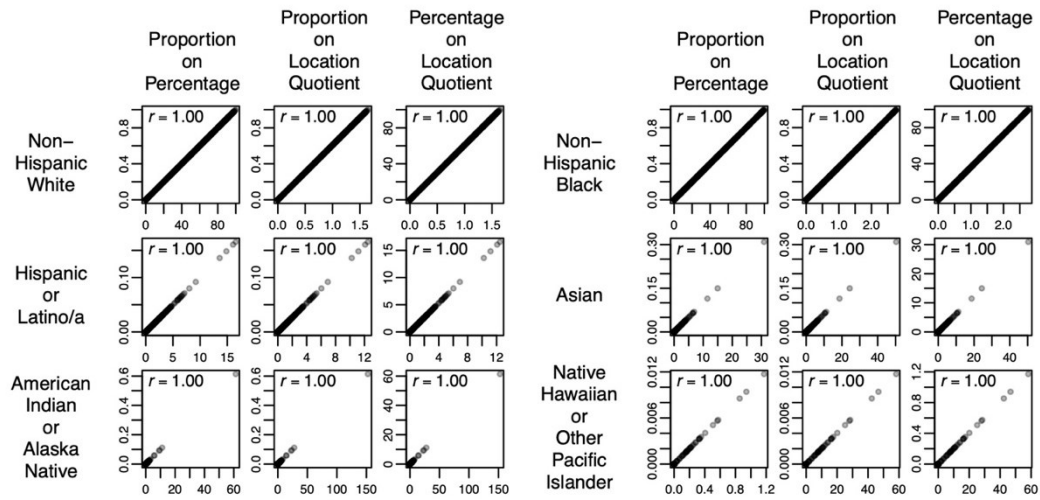

Figure S67. Relationships between census-tract-based measures in the State of Mississippi (2000).

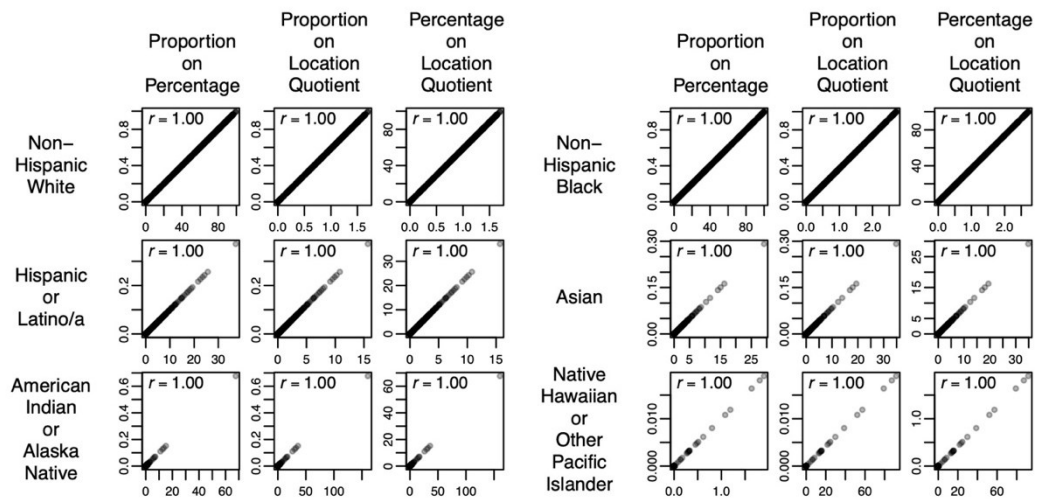

Figure S68. Relationships between census-tract-based measures in the State of Mississippi (2010).

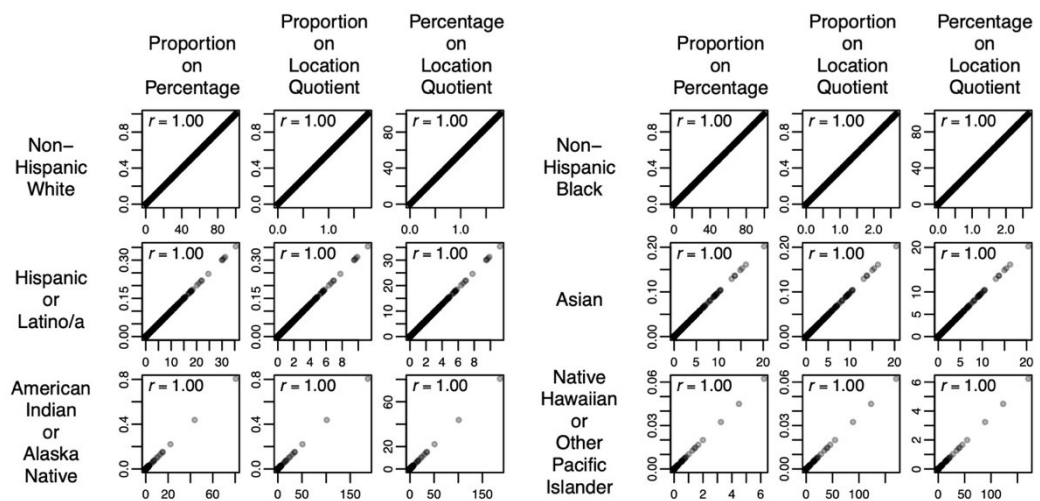

Figure S69. Relationships between census-tract-based measures in the State of Mississippi (2020).

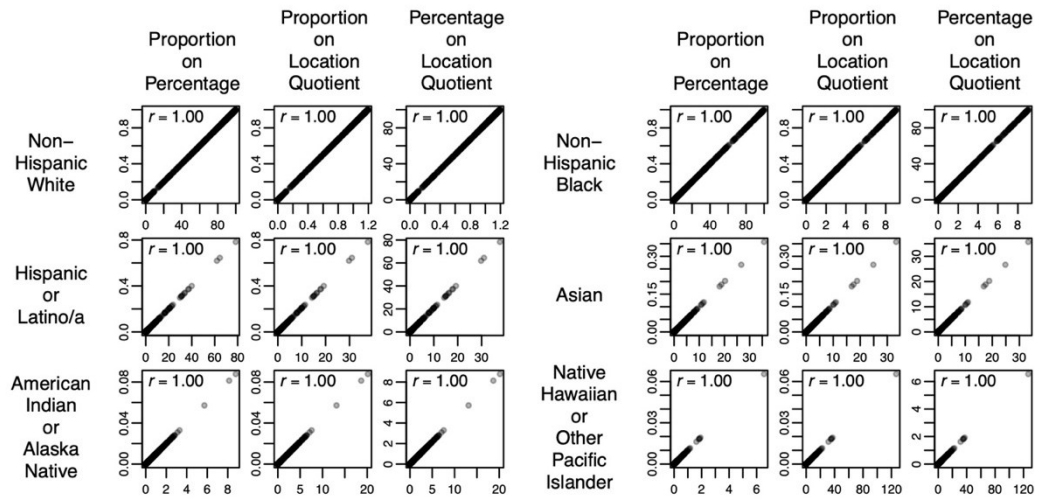

Figure S70. Relationships between census-tract-based measures in the State of Missouri (2000).

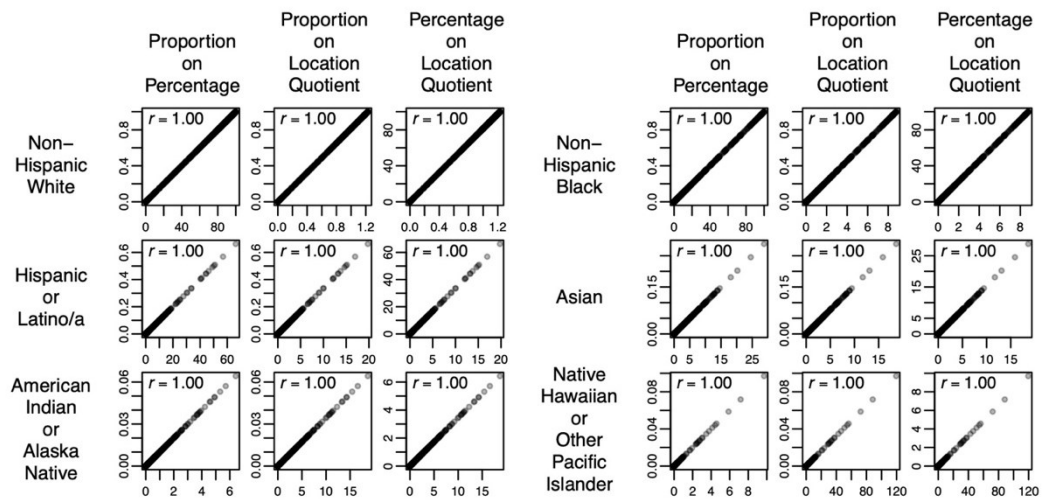

Figure S71. Relationships between census-tract-based measures in the State of Missouri (2010).

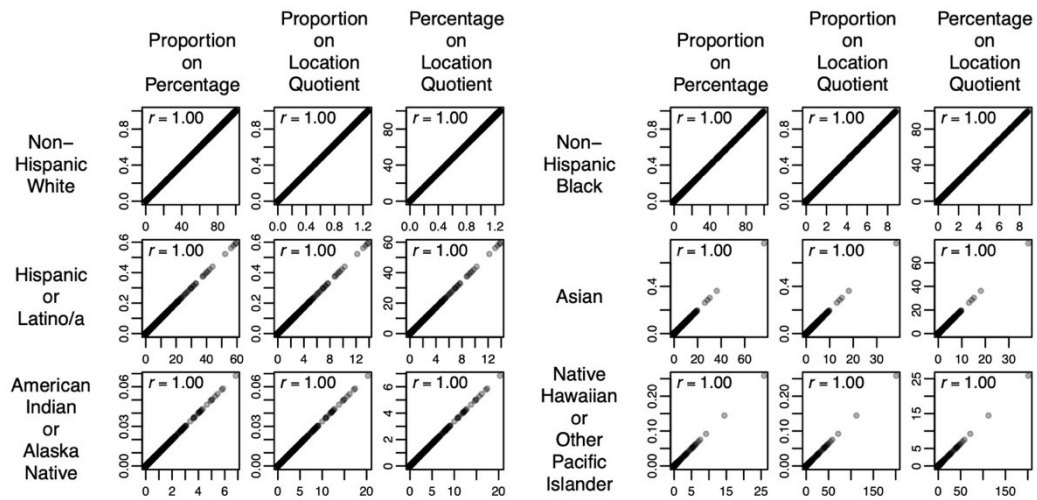

Figure S72. Relationships between census-tract-based measures in the State of Missouri (2020).

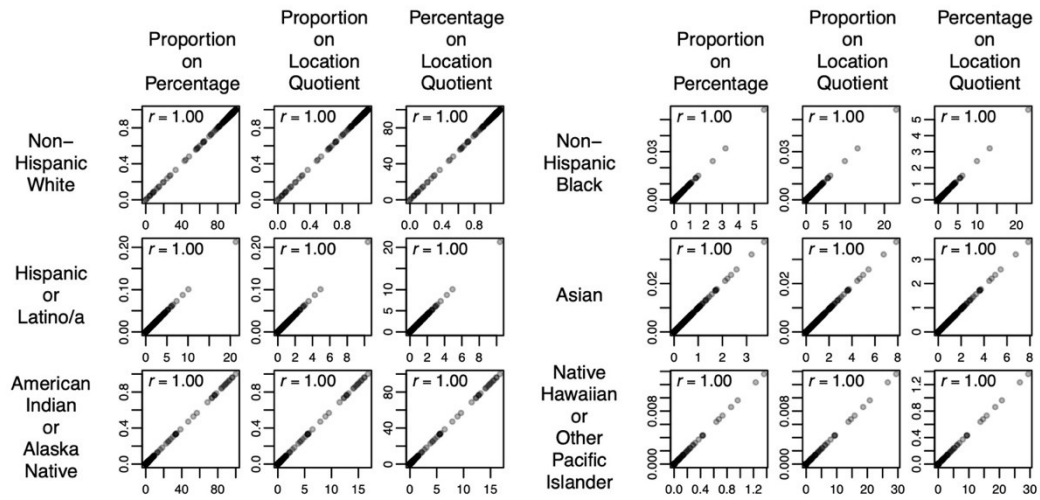

Figure S73. Relationships between census-tract-based measures in the State of Montana (2000).

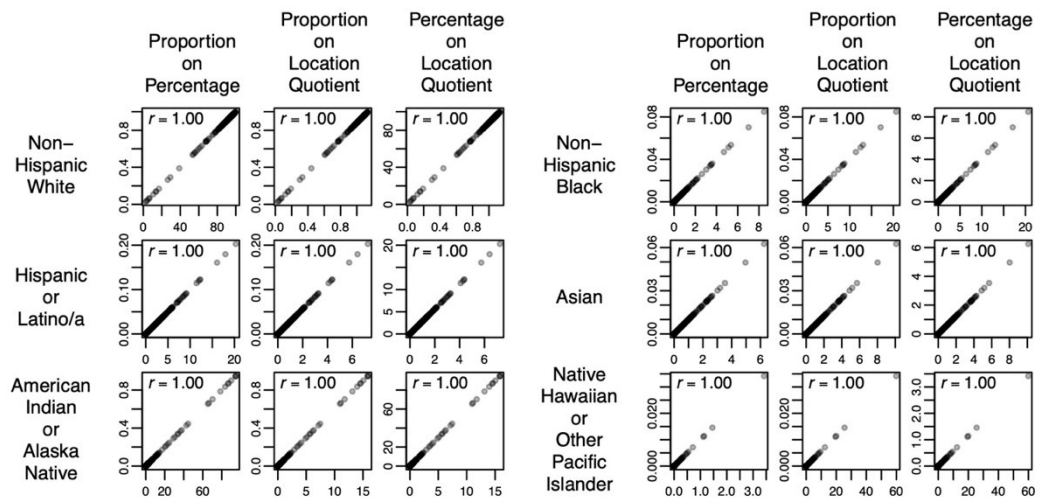

Figure S74. Relationships between census-tract-based measures in the State of Montana (2010).

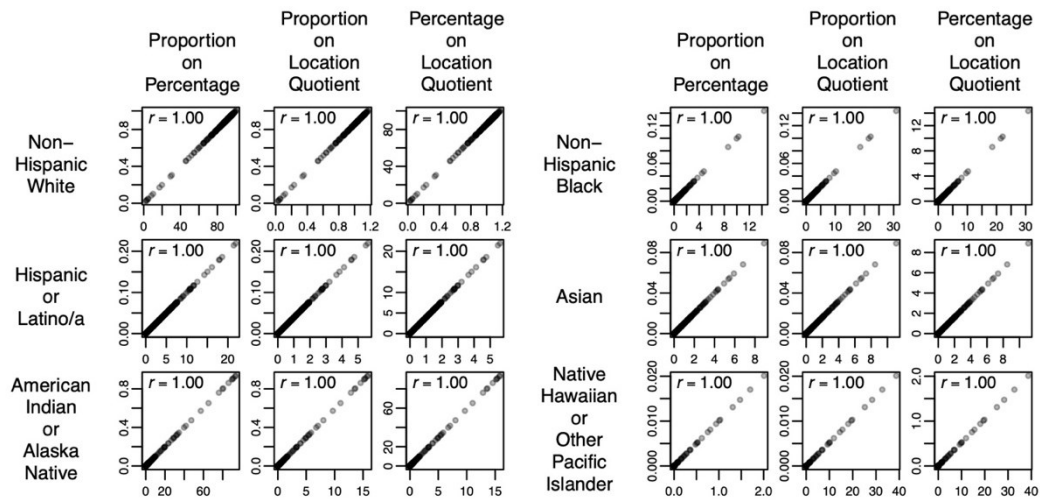

Figure S75. Relationships between census-tract-based measures in the State of Montana (2020).

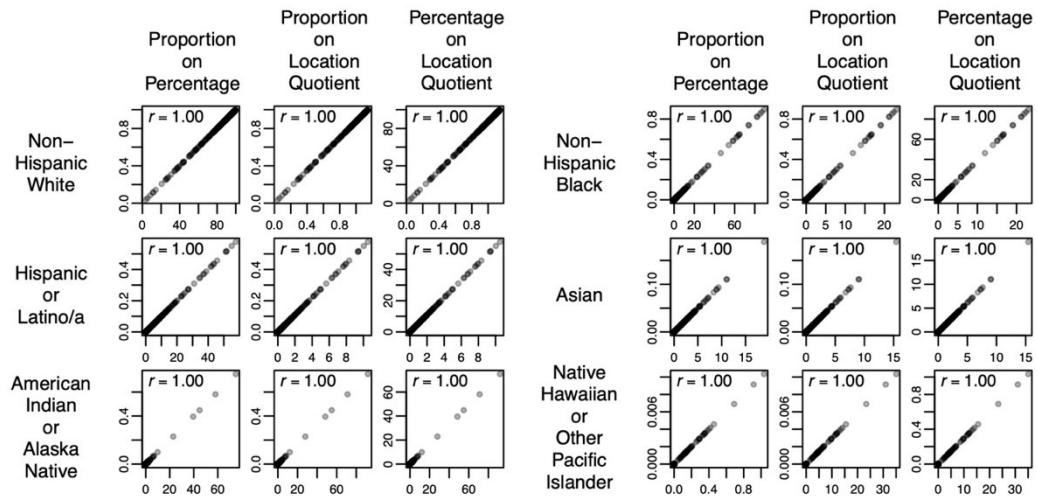

Figure S76. Relationships between census-tract-based measures in the State of Nebraska (2000).

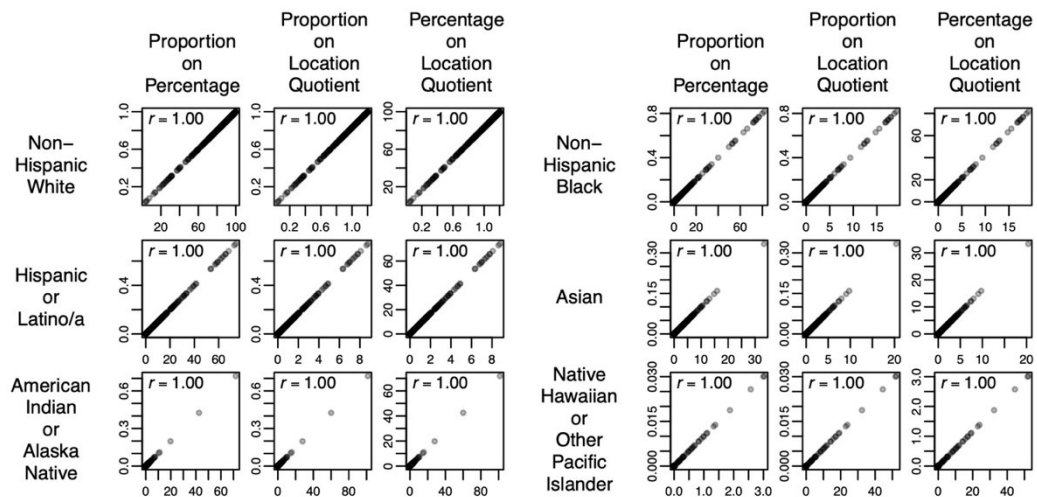

Figure S77. Relationships between census-tract-based measures in the State of Nebraska (2010).

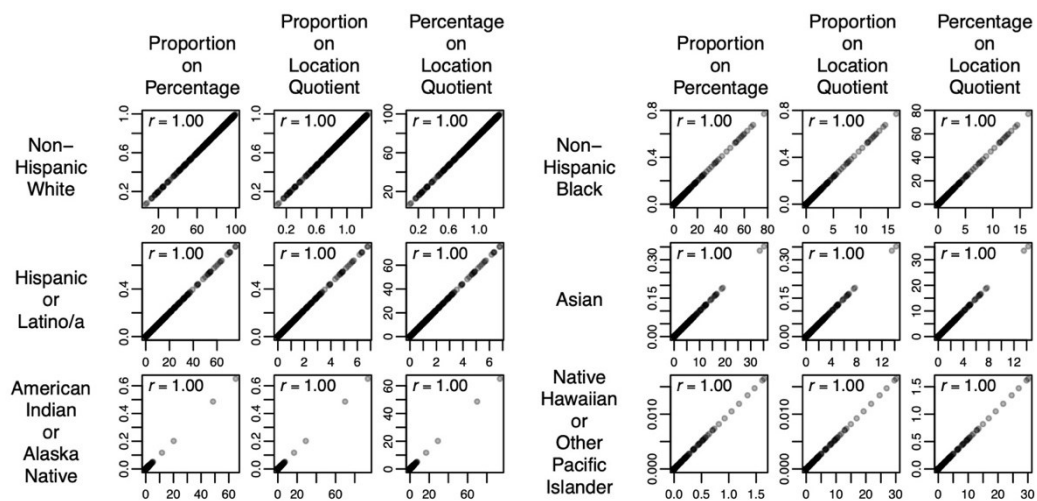

Figure S78. Relationships between census-tract-based measures in the State of Nebraska (2020).

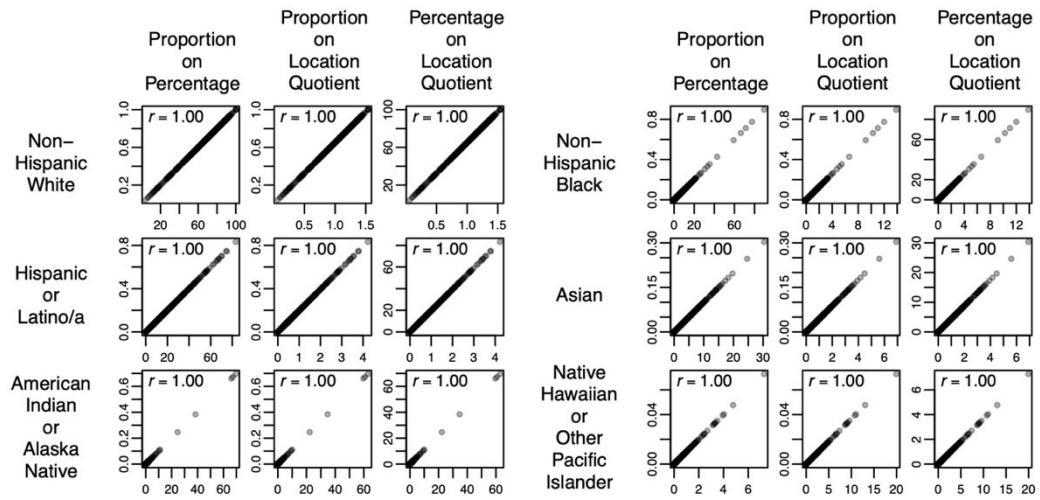

Figure S79. Relationships between census-tract-based measures in the State of Nevada (2000).

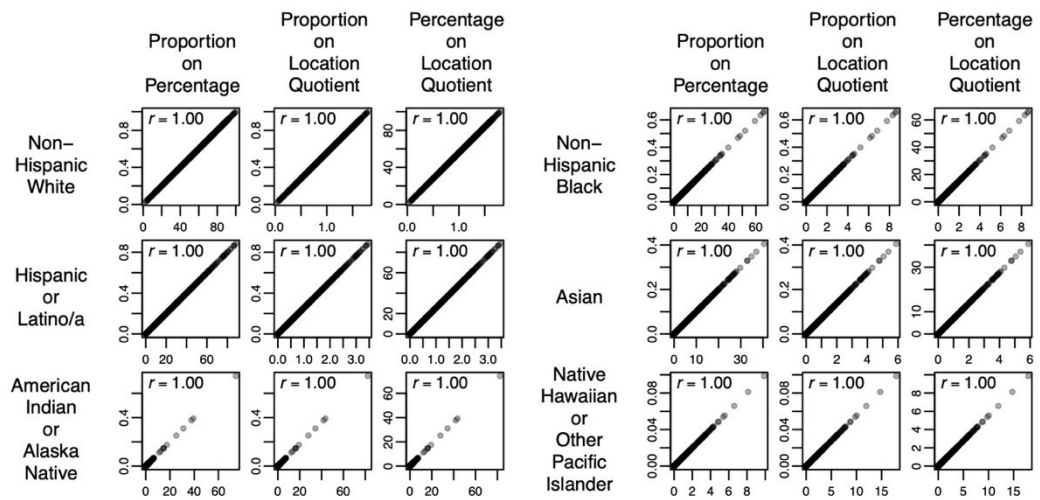

Figure S80. Relationships between census-tract-based measures in the State of Nevada (2010).

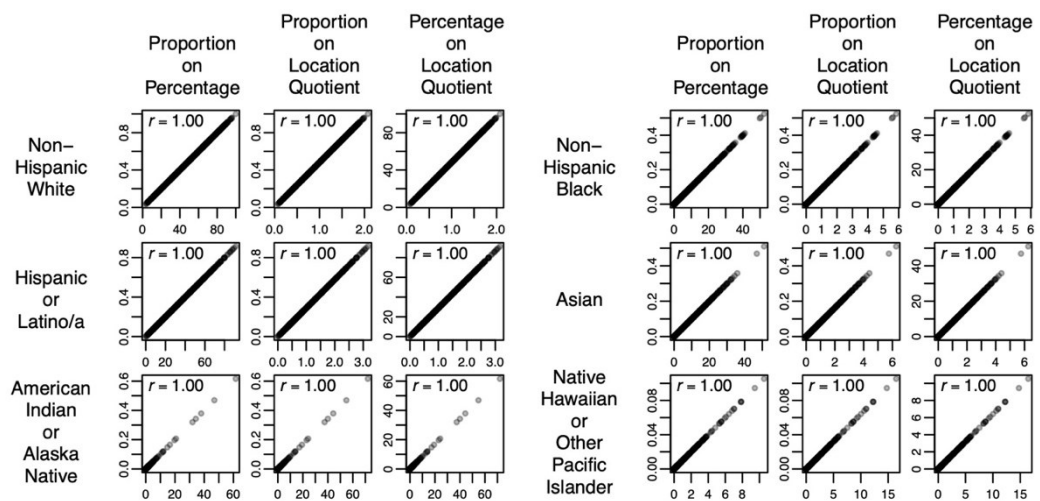

Figure S81. Relationships between census-tract-based measures in the State of Nevada (2020).

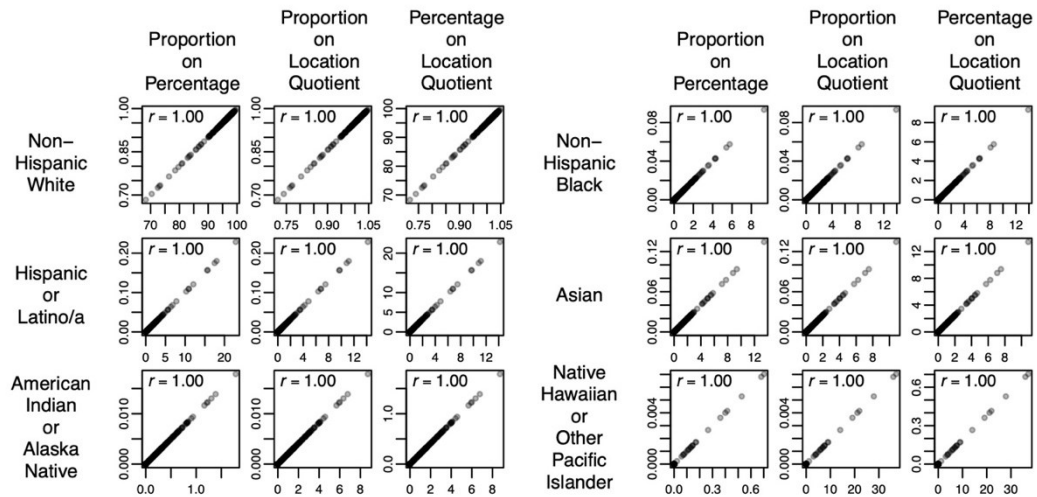

Figure S82. Relationships between census-tract-based measures in the State of New Hampshire (2000).

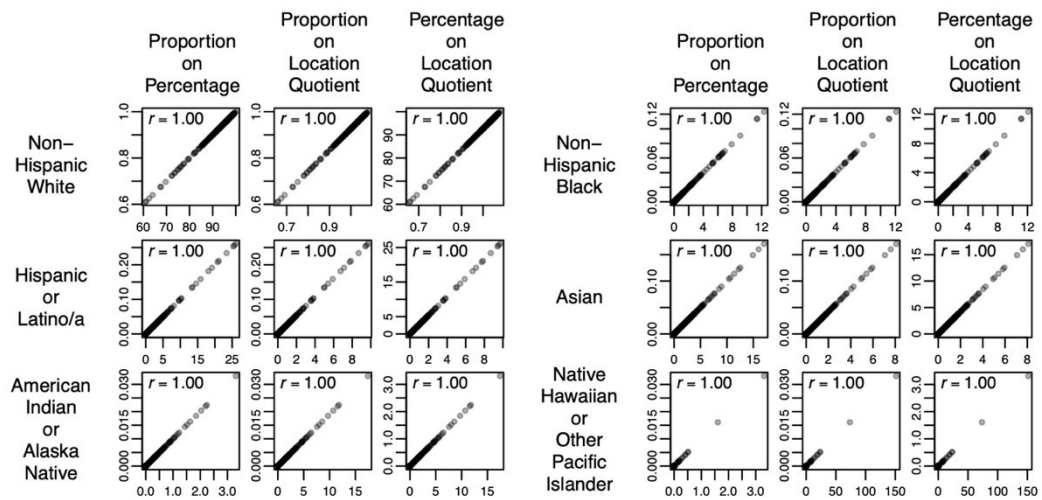

Figure S83. Relationships between census-tract-based measures in the State of New Hampshire (2010).

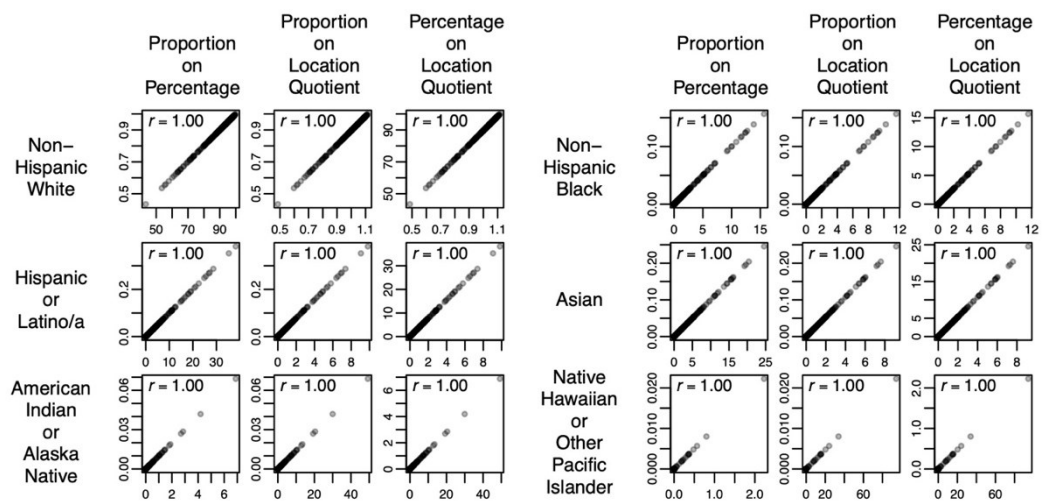

Figure S84. Relationships between census-tract-based measures in the State of New Hampshire (2020).

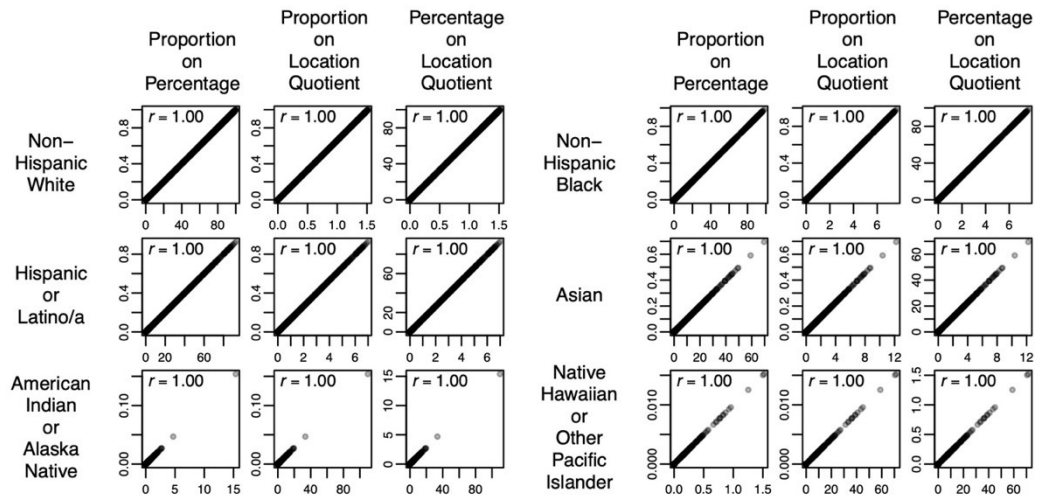

Figure S85. Relationships between census-tract-based measures in the State of New Jersey (2000).

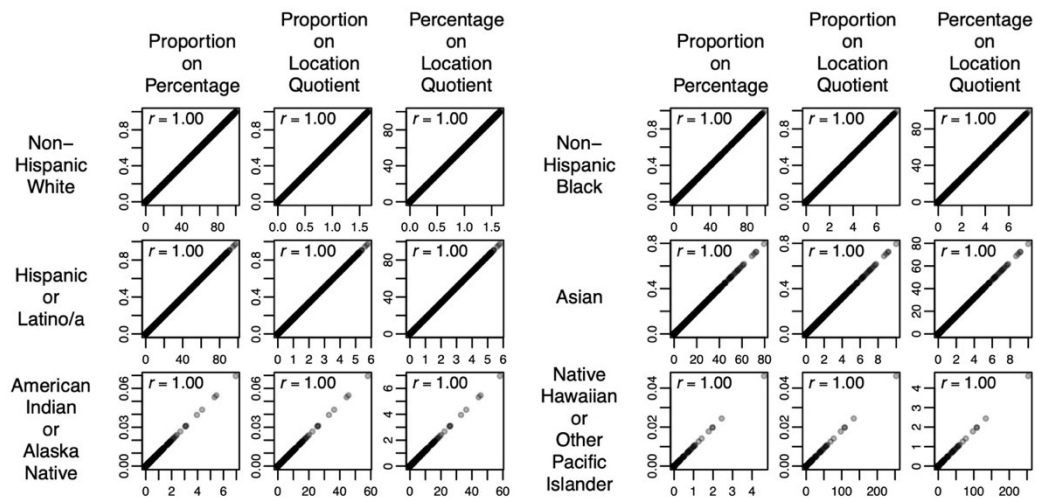

Figure S86. Relationships between census-tract-based measures in the State of New Jersey (2010).

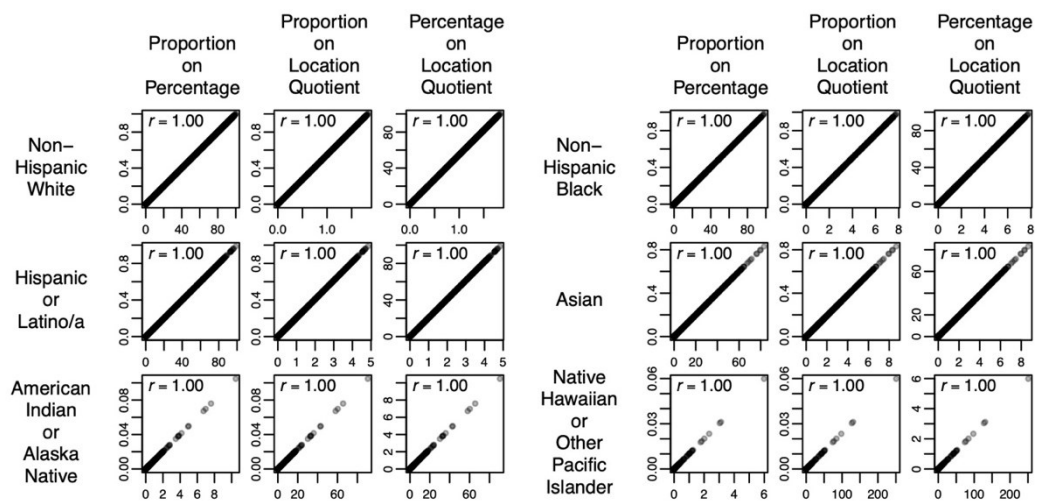

Figure S87. Relationships between census-tract-based measures in the State of New Jersey (2020).

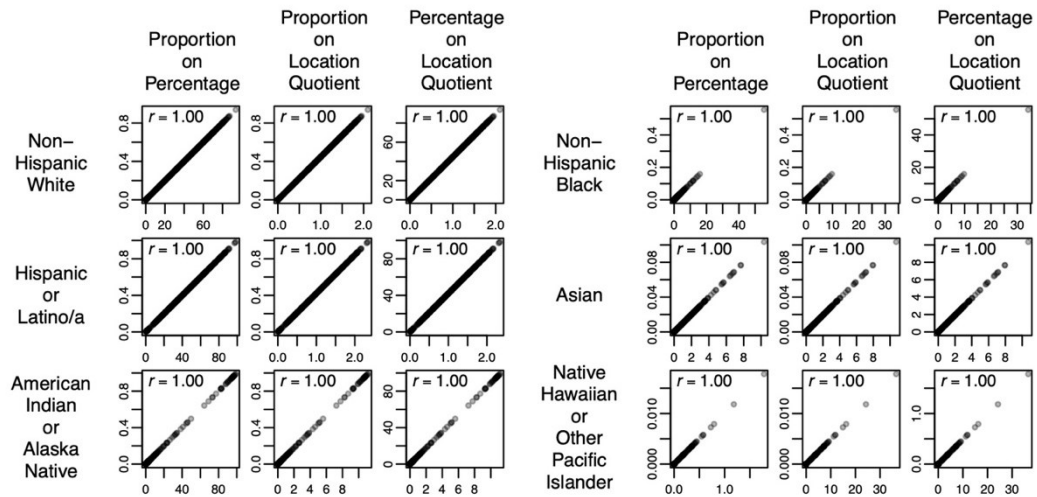

Figure S88. Relationships between census-tract-based measures in the State of New Mexico (2000).

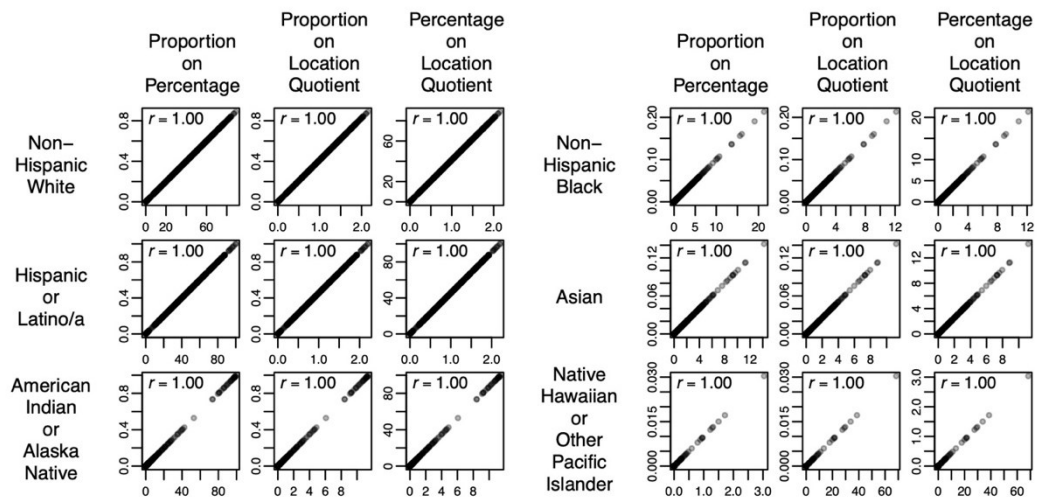

Figure S89. Relationships between census-tract-based measures in the State of New Mexico (2010).

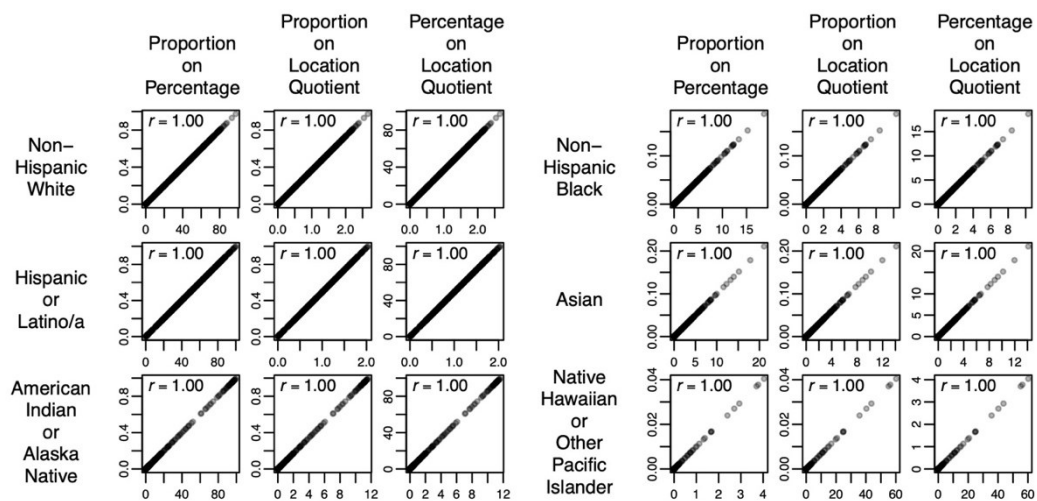

Figure S90. Relationships between census-tract-based measures in the State of New Mexico (2020).

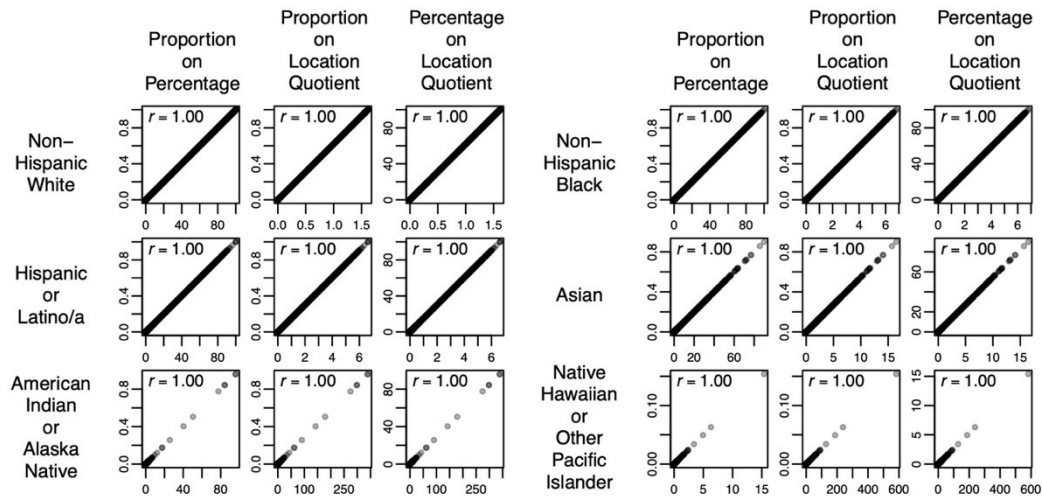

Figure S91. Relationships between census-tract-based measures in the State of New York (2000).

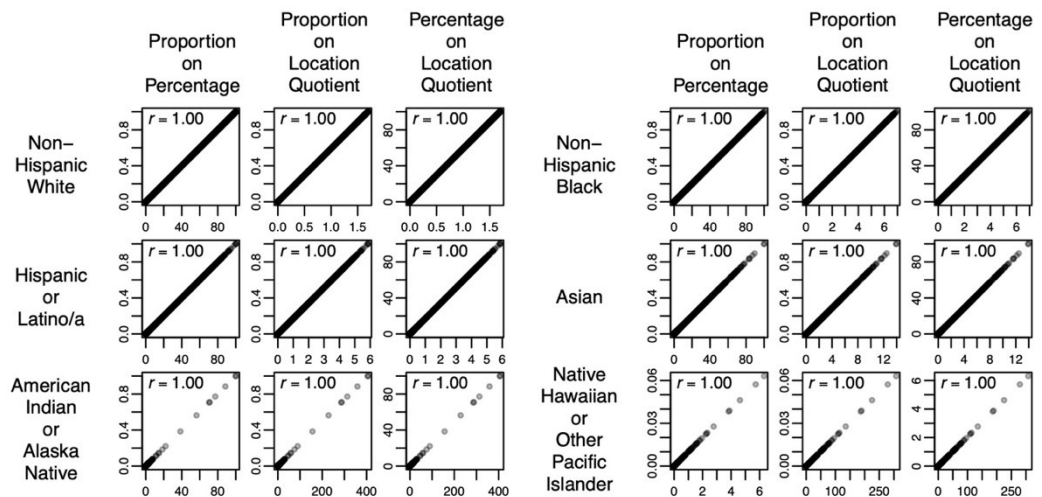

Figure S92. Relationships between census-tract-based measures in the State of New York (2010).

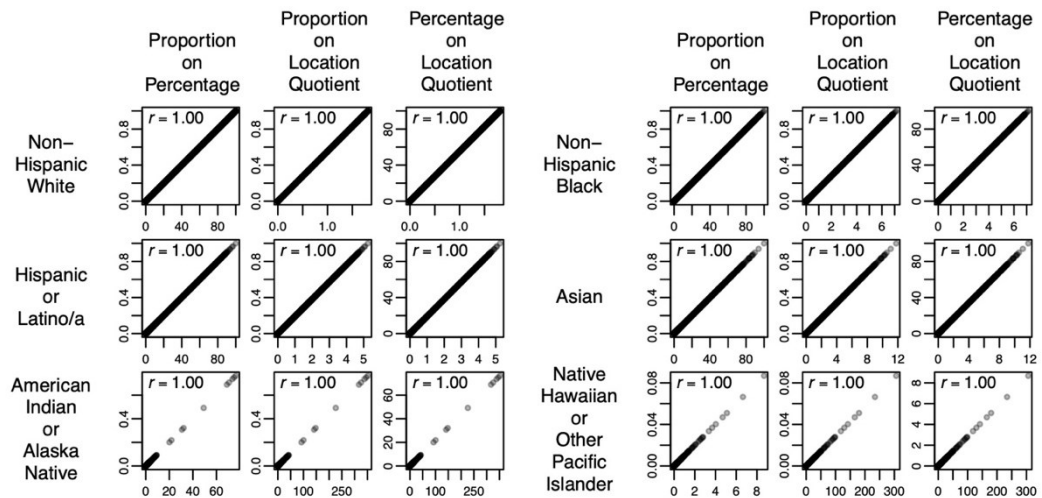

Figure S93. Relationships between census-tract-based measures in the State of New York (2020).

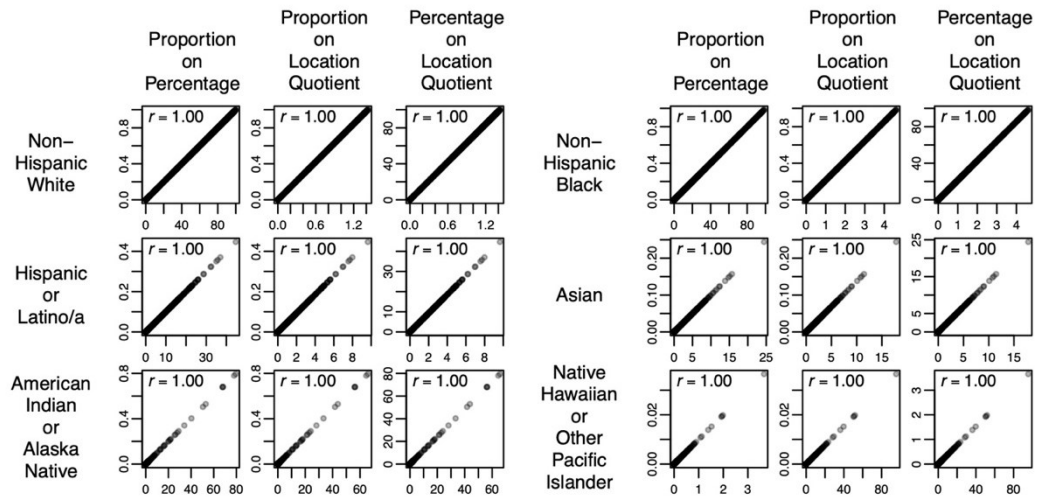

Figure S94. Relationships between census-tract-based measures in the State of North Carolina (2000).

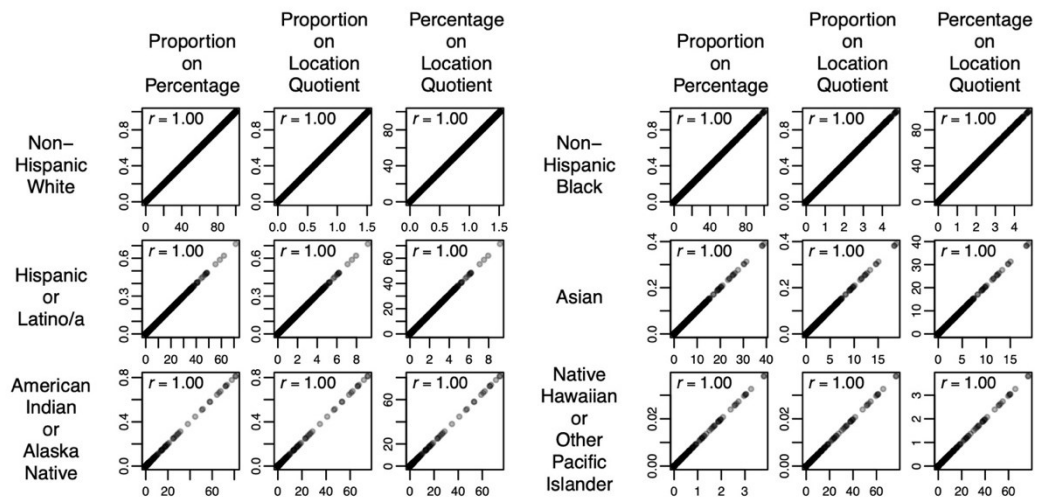

Figure S95. Relationships between census-tract-based measures in the State of North Carolina (2010).

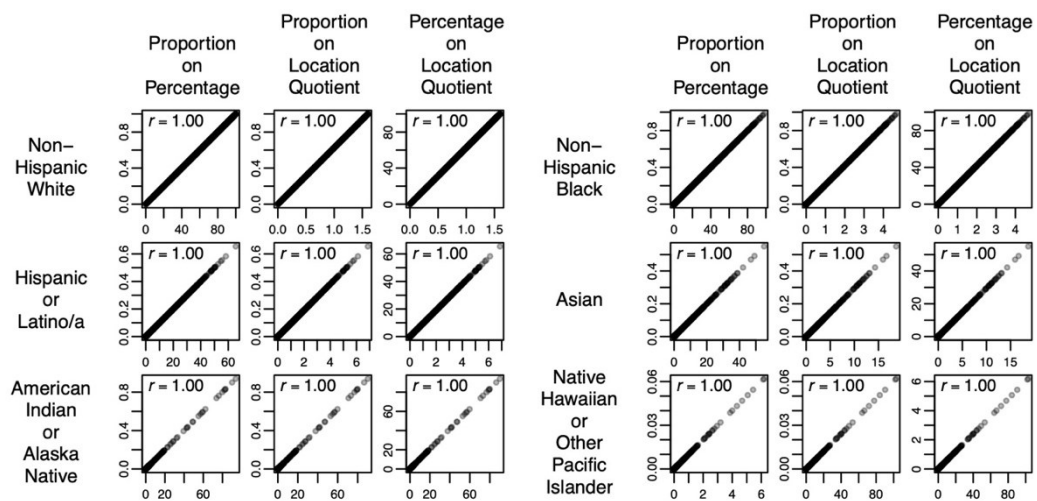

Figure S96. Relationships between census-tract-based measures in the State of North Carolina (2020).

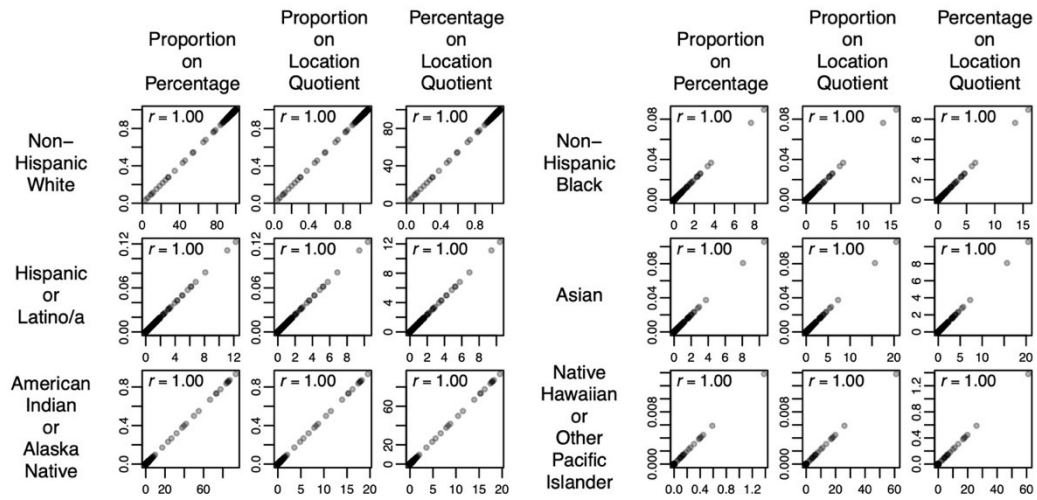

Figure S97. Relationships between census-tract-based measures in the State of North Dakota (2000).

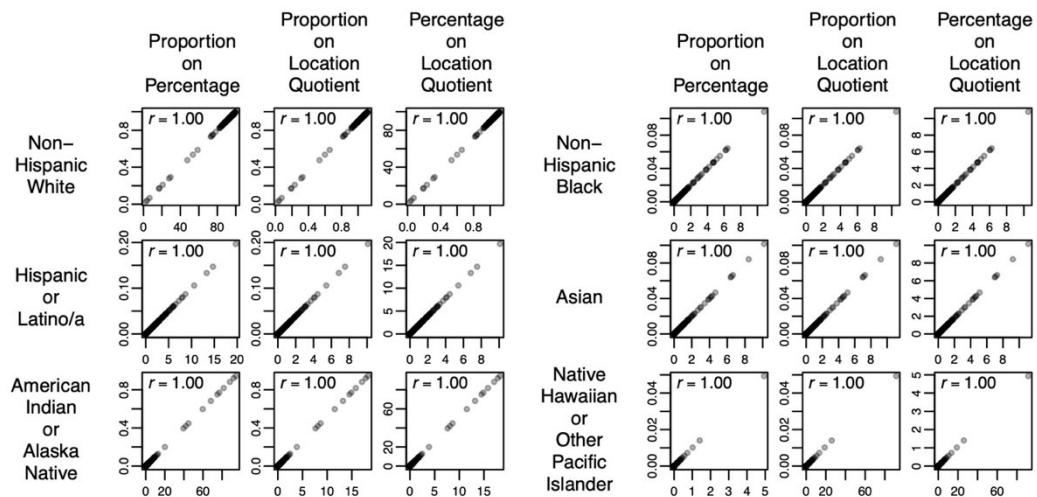

Figure S98. Relationships between census-tract-based measures in the State of North Dakota (2010).

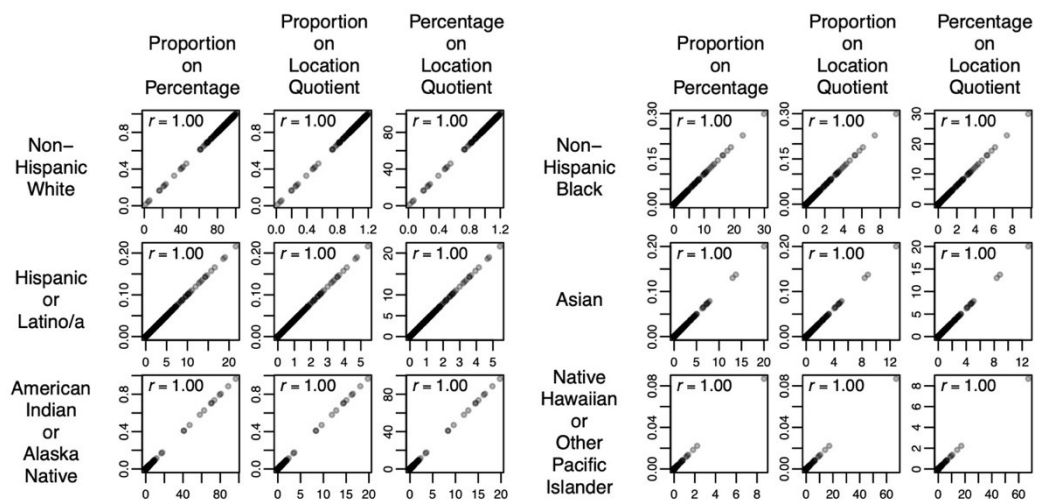

Figure S99. Relationships between census-tract-based measures in the State of North Dakota (2020).

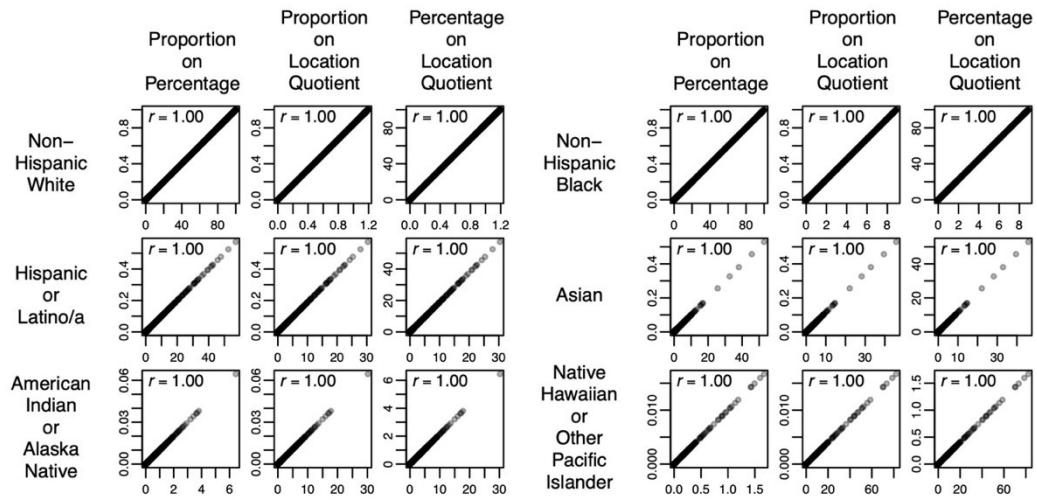

Figure S100. Relationships between census-tract-based measures in the State of Ohio (2000).

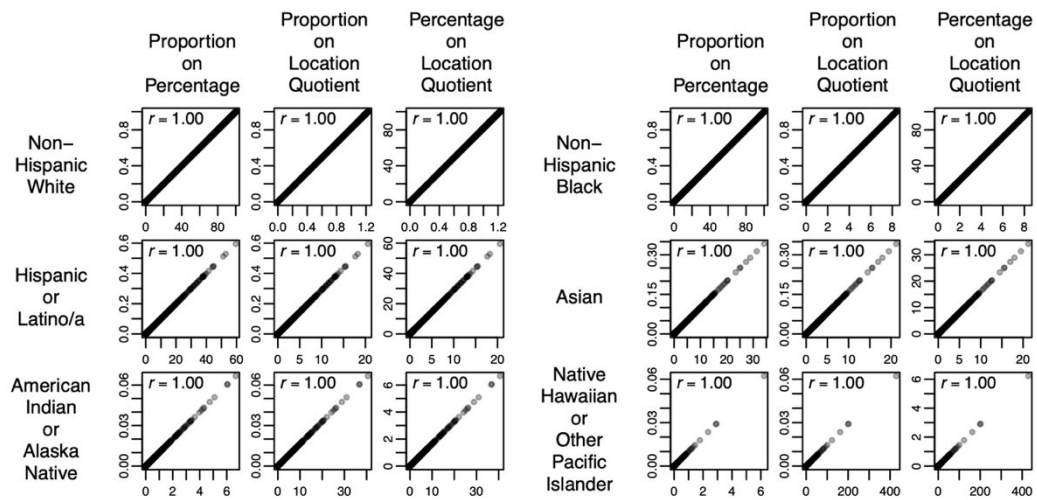

Figure S101. Relationships between census-tract-based measures in the State of Ohio (2010).

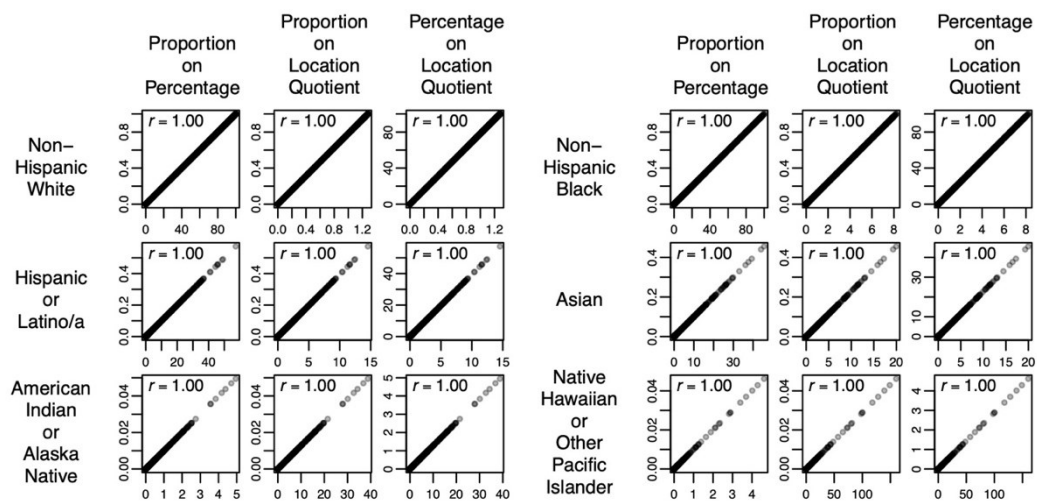

Figure S102. Relationships between census-tract-based measures in the State of Ohio (2020).

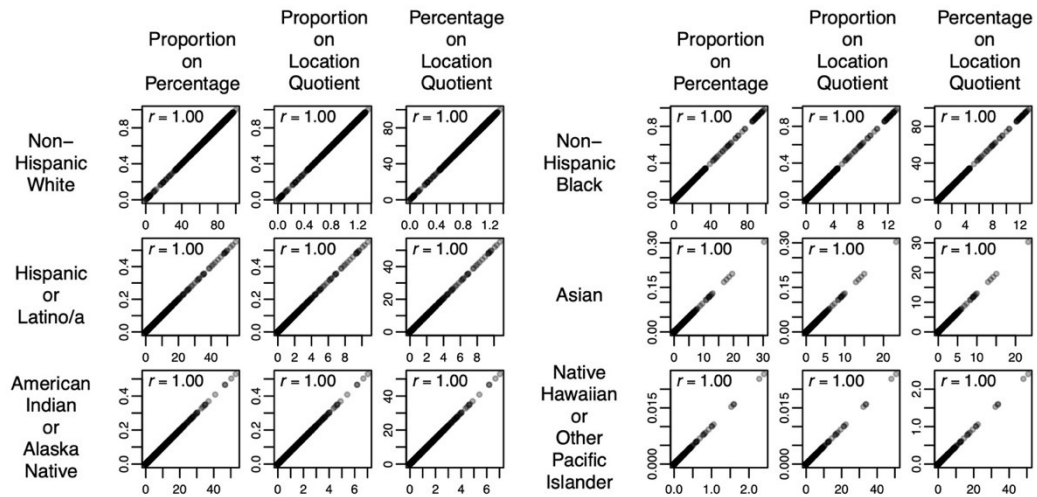

Figure S103. Relationships between census-tract-based measures in the State of Oklahoma (2000).

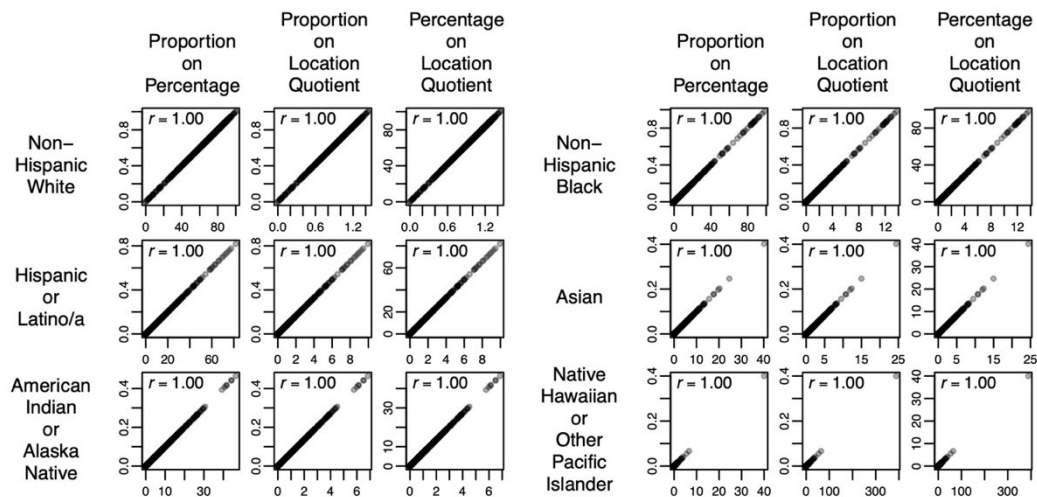

Figure S104. Relationships between census-tract-based measures in the State of Oklahoma (2010).

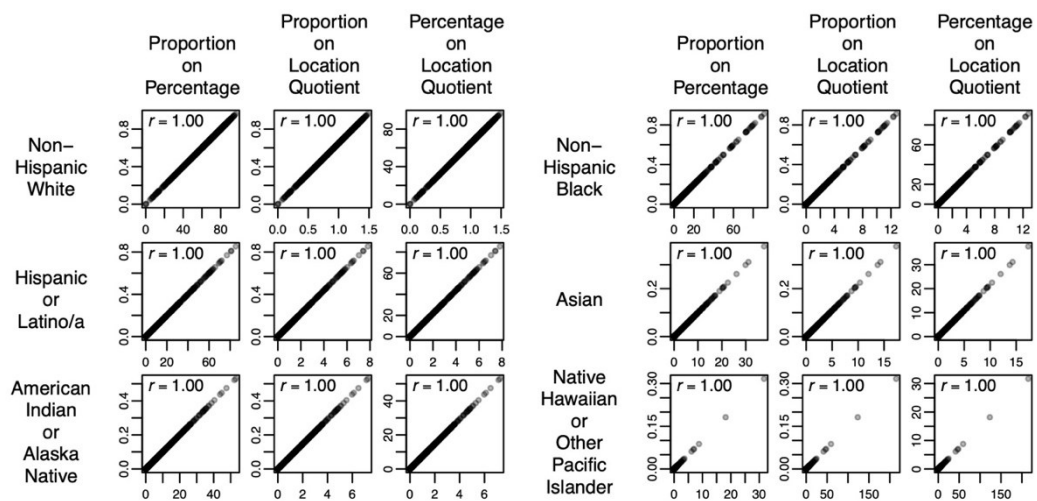

Figure S105. Relationships between census-tract-based measures in the State of Oklahoma (2020).

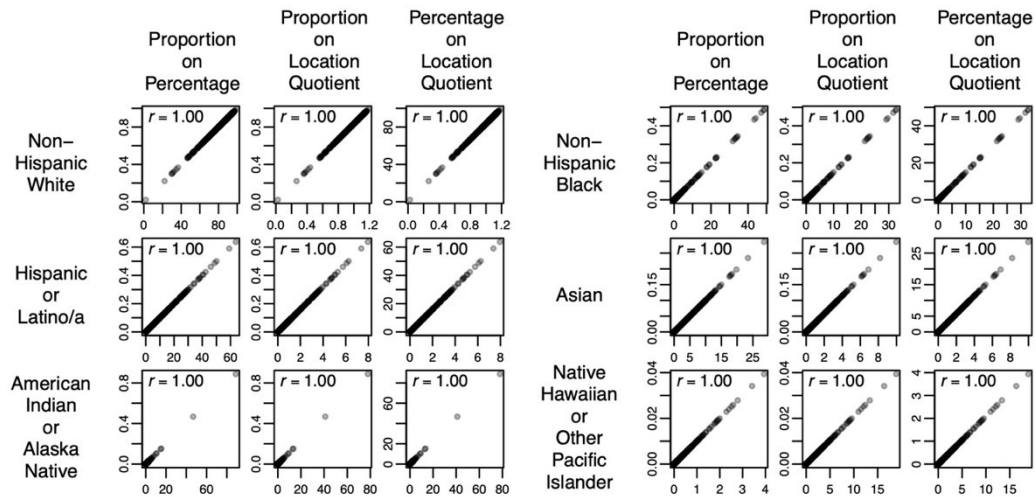

Figure S106. Relationships between census-tract-based measures in the State of Oregon (2000).

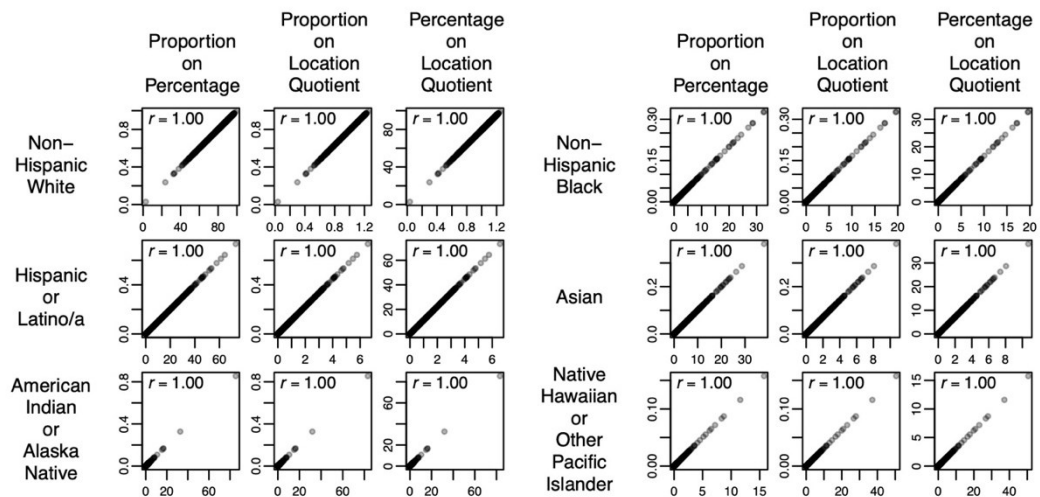

Figure S107. Relationships between census-tract-based measures in the State of Oregon (2010).

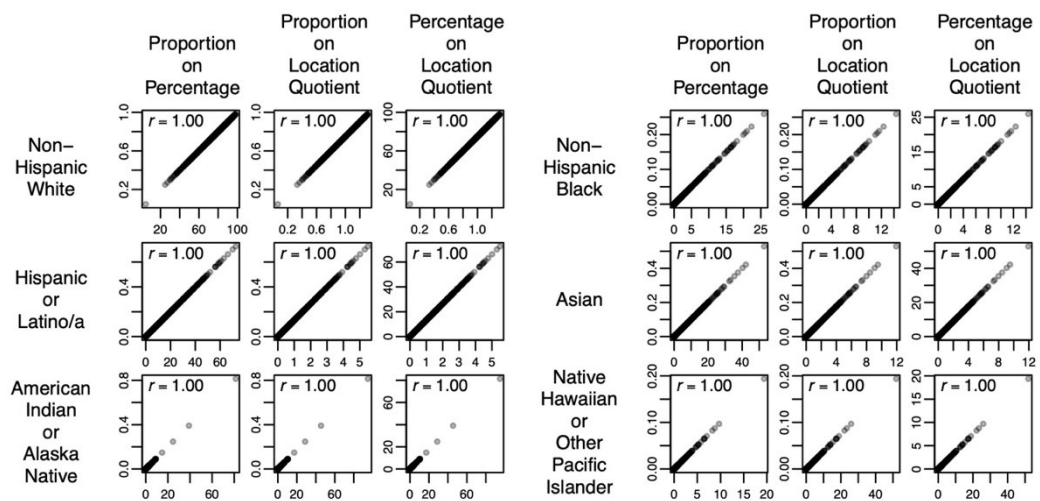

Figure S108. Relationships between census-tract-based measures in the State of Oregon (2020).

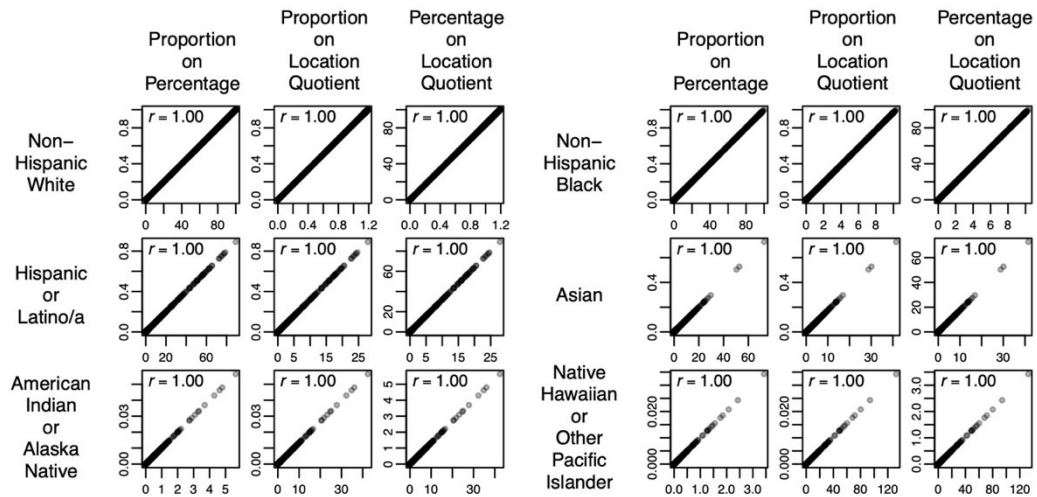

Figure S109. Relationships between census-tract-based measures in the State of Pennsylvania (2000).

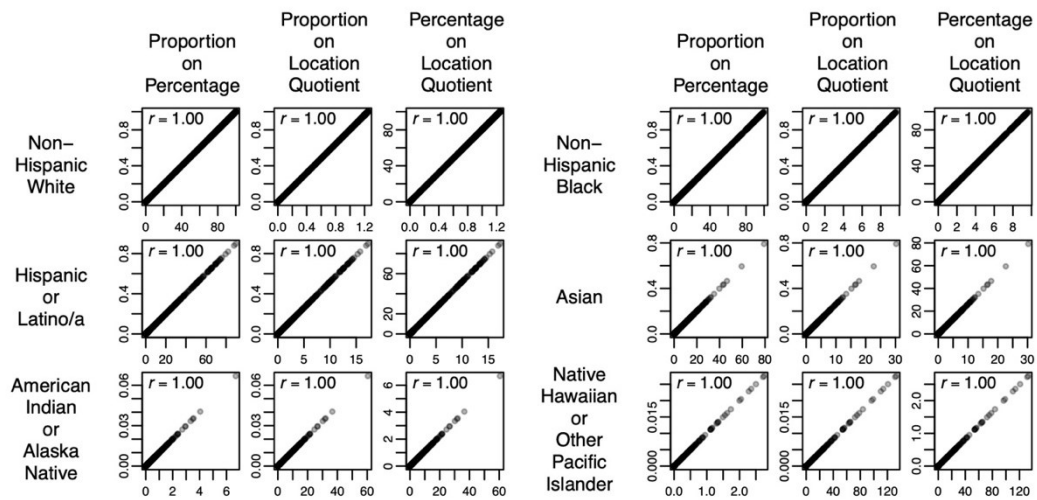

Figure S110. Relationships between census-tract-based measures in the State of Pennsylvania (2010).

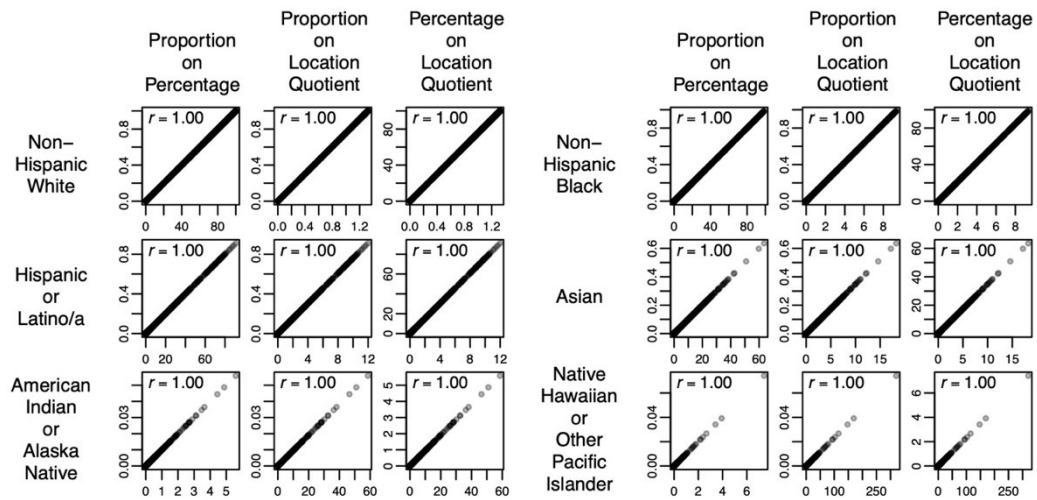

Figure S111. Relationships between census-tract-based measures in the State of Pennsylvania (2020).

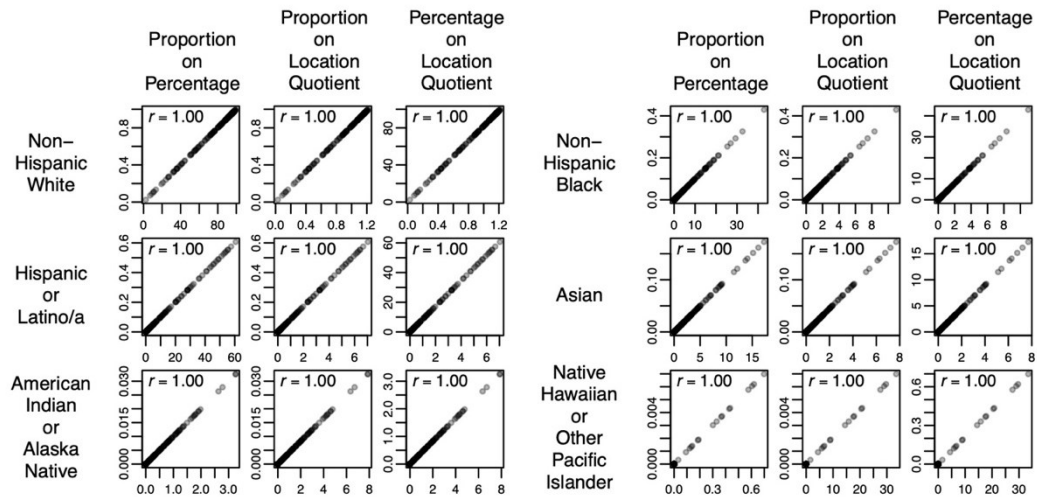

Figure S112. Relationships between census-tract-based measures in the State of Rhode Island (2000).

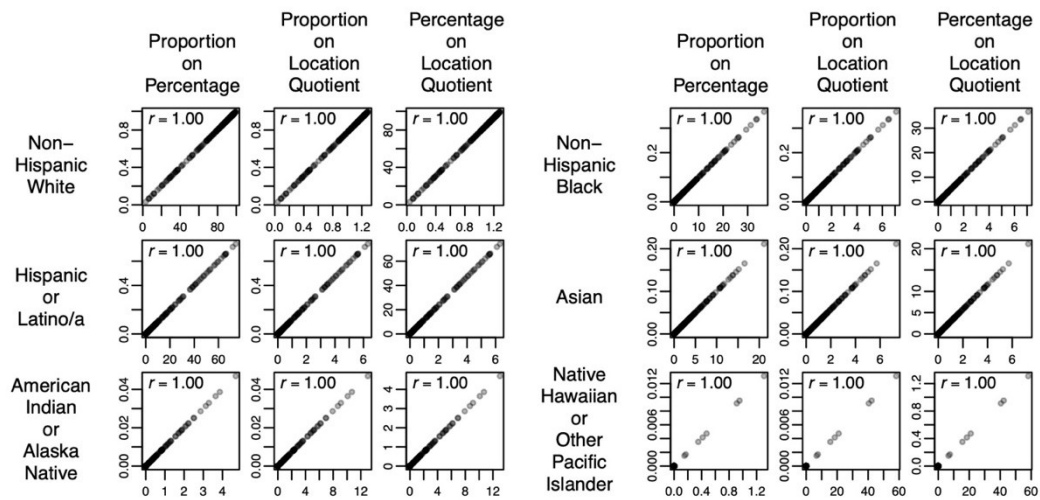

Figure S113. Relationships between census-tract-based measures in the State of Rhode Island (2010).

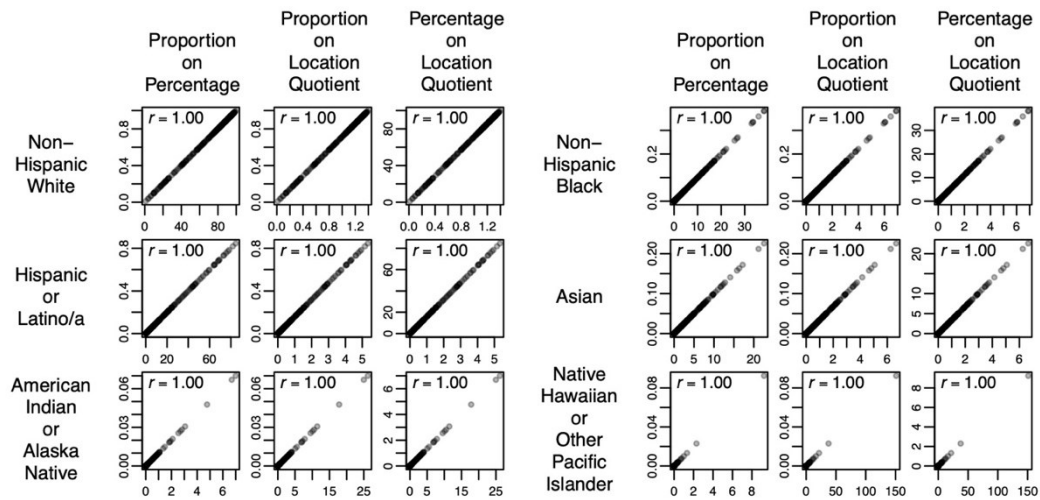

Figure S114. Relationships between census-tract-based measures in the State of Rhode Island (2020).

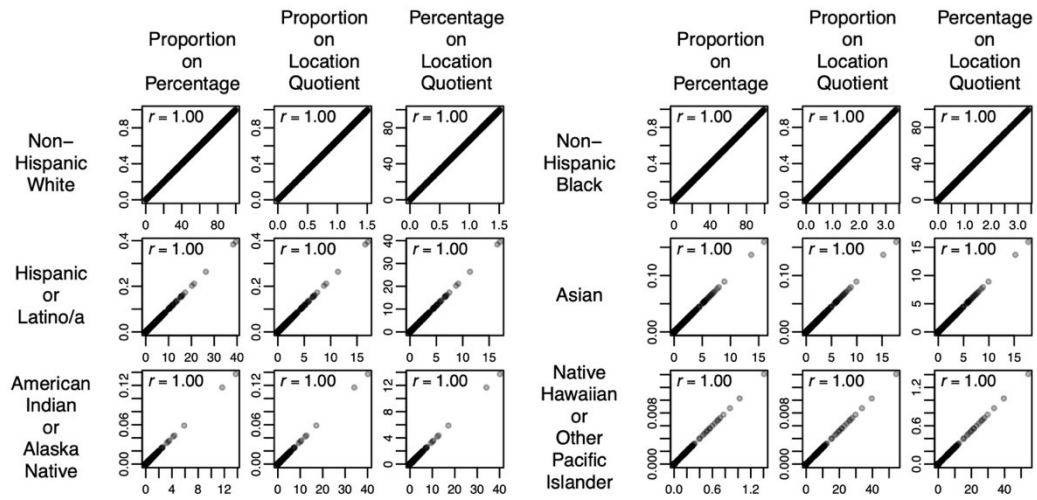

Figure S115. Relationships between census-tract-based measures in the State of South Carolina (2000).

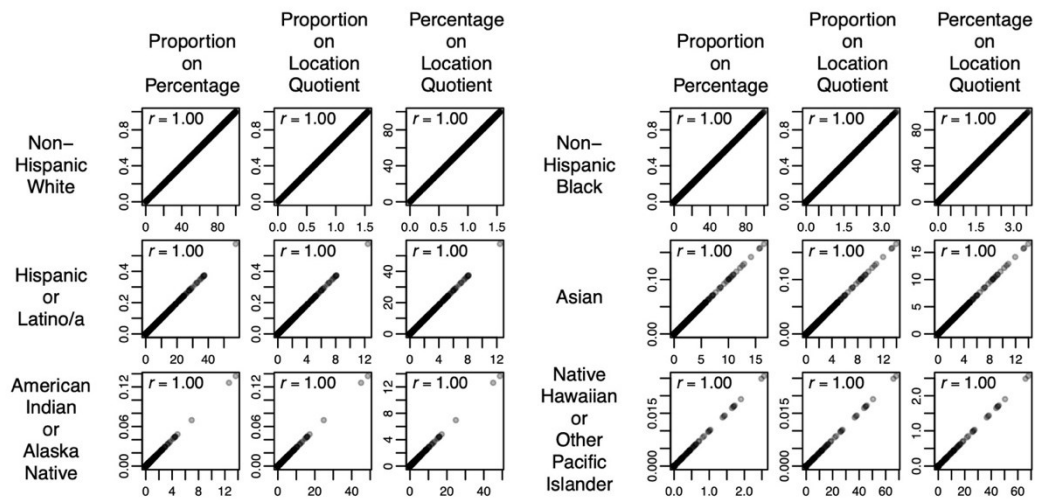

Figure S116. Relationships between census-tract-based measures in the State of South Carolina (2010).

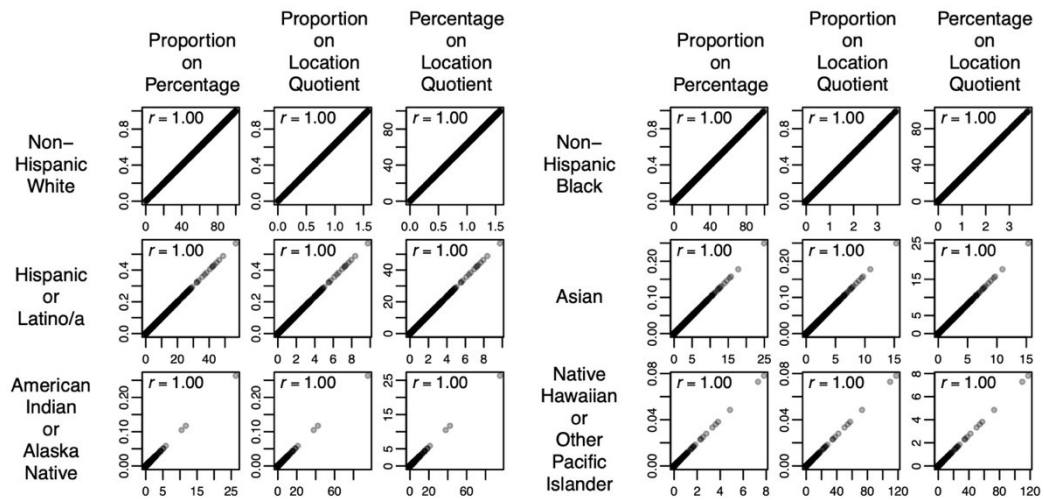

Figure S117. Relationships between census-tract-based measures in the State of South Carolina (2020).

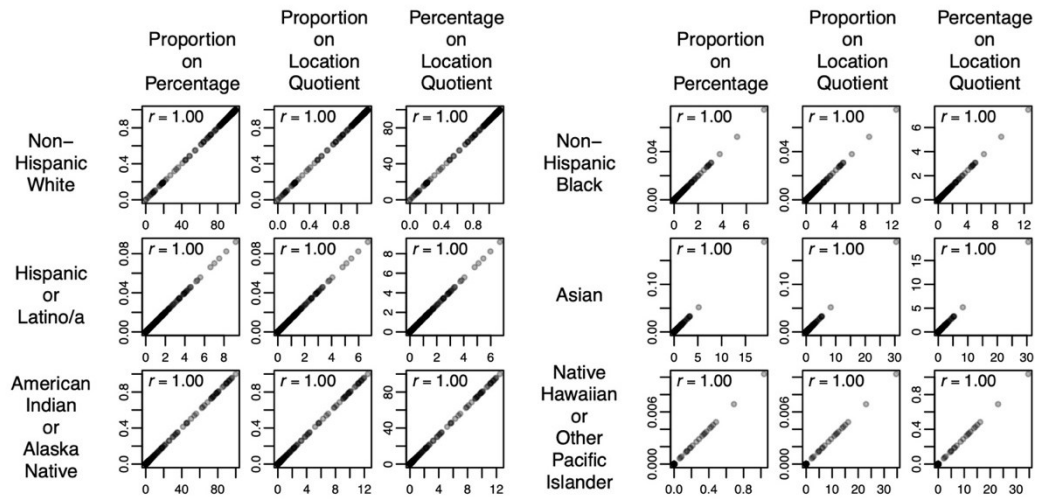

Figure S118. Relationships between census-tract-based measures in the State of South Dakota (2000).

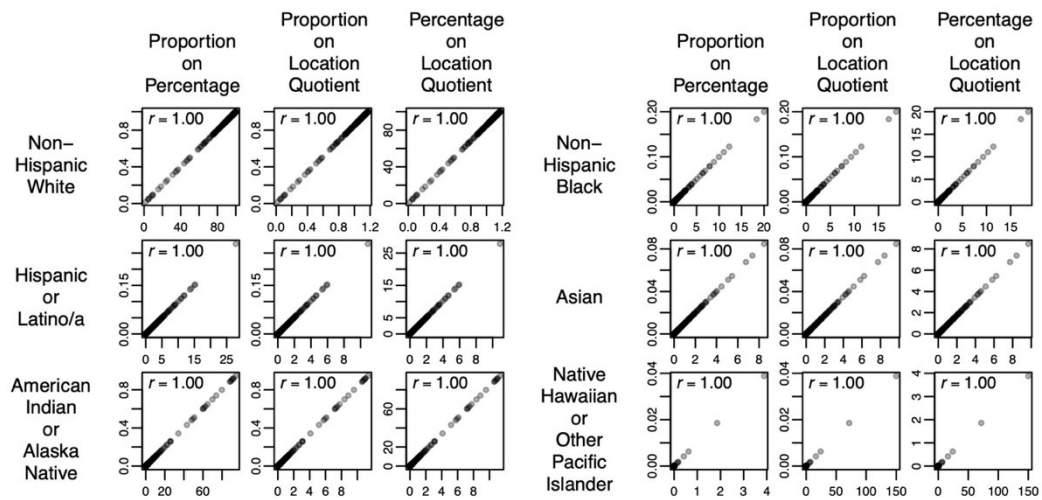

Figure S119. Relationships between census-tract-based measures in the State of South Dakota (2010).

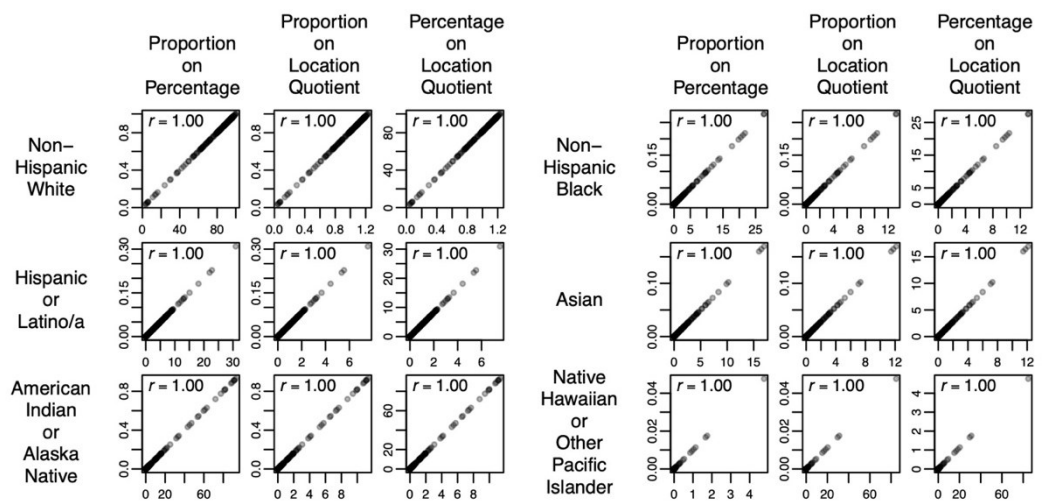

Figure S120. Relationships between census-tract-based measures in the State of South Dakota (2020).

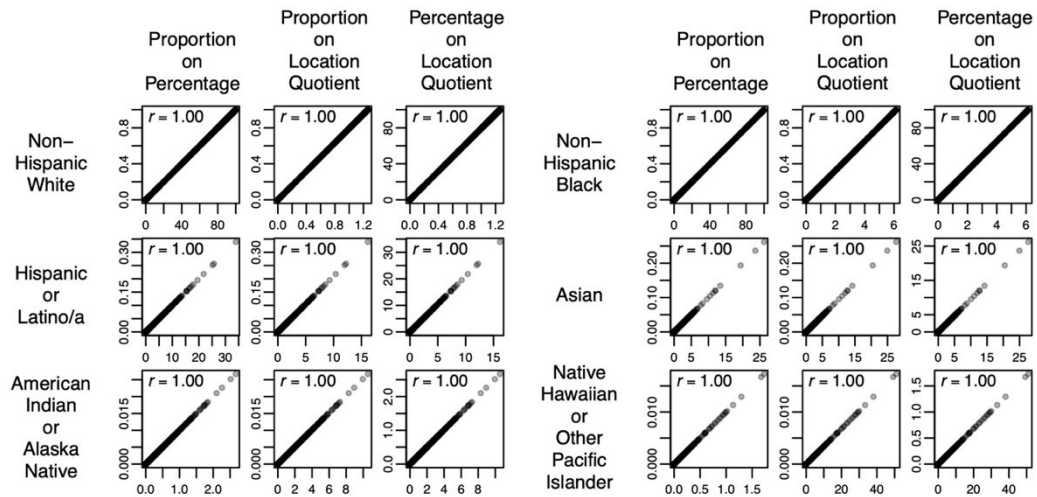

Figure S121. Relationships between census-tract-based measures in the State of Tennessee (2000).

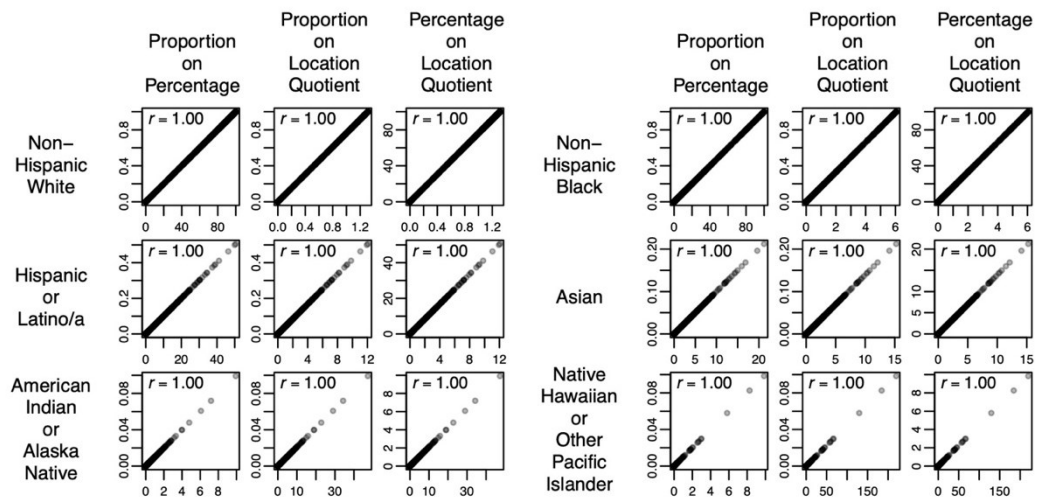

Figure S122. Relationships between census-tract-based measures in the State of Tennessee (2010).

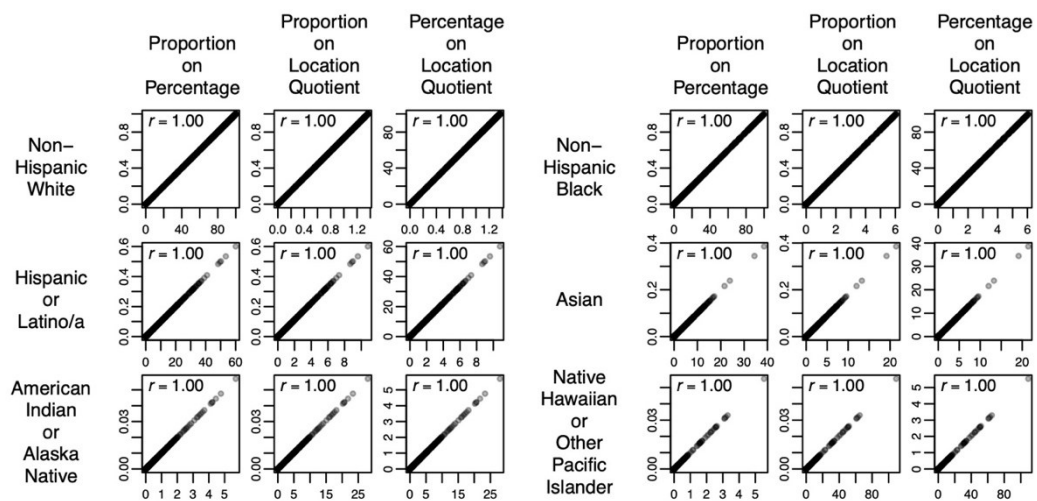

Figure S123. Relationships between census-tract-based measures in the State of Tennessee (2020).

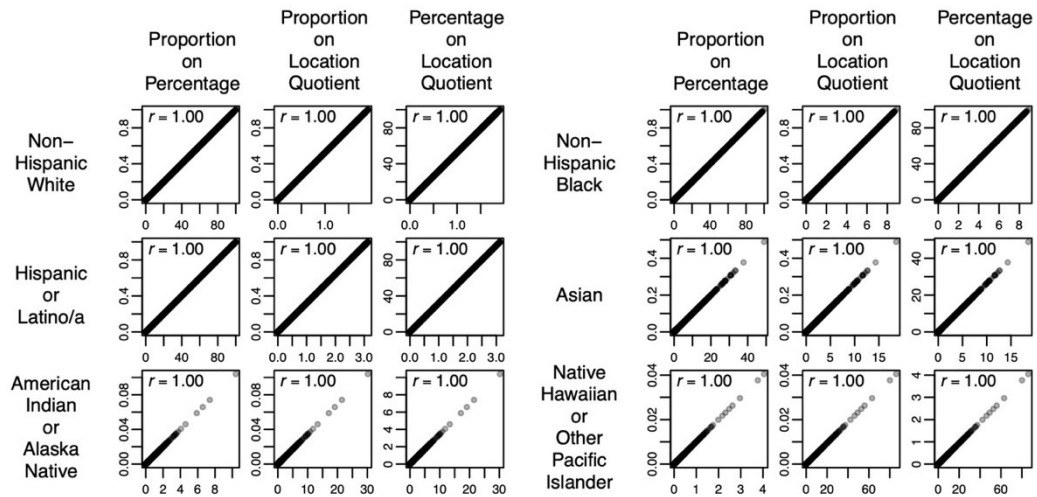

Figure S124. Relationships between census-tract-based measures in the State of Texas (2000).

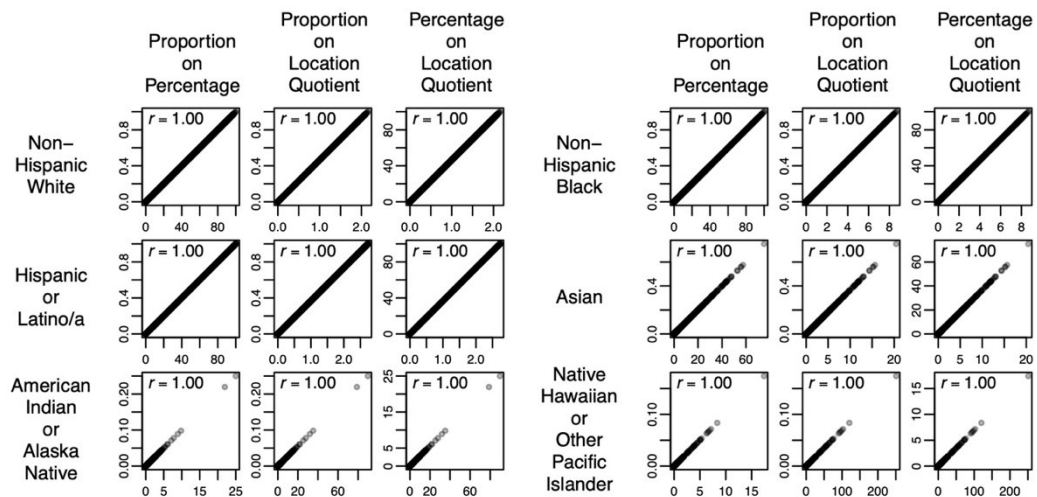

Figure S125. Relationships between census-tract-based measures in the State of Texas (2010).

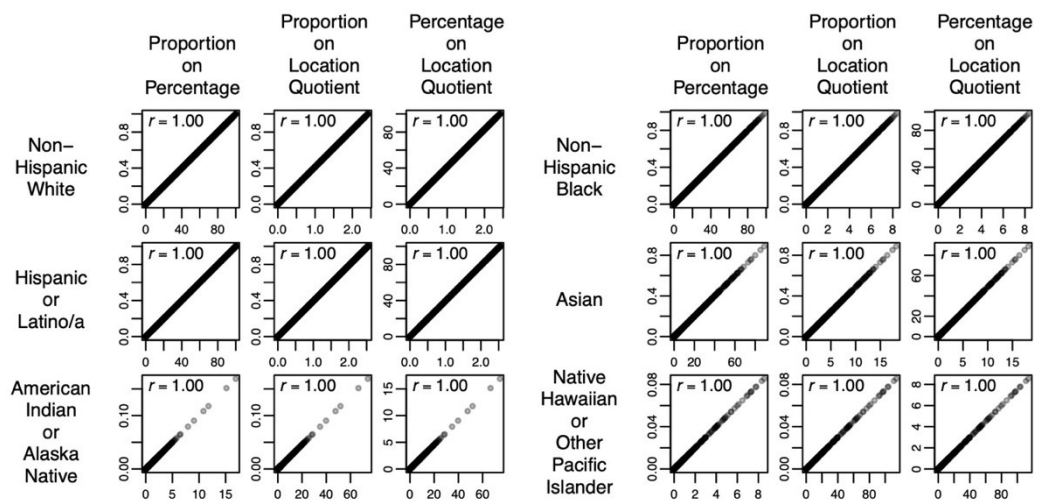

Figure S126. Relationships between census-tract-based measures in the State of Texas (2020).

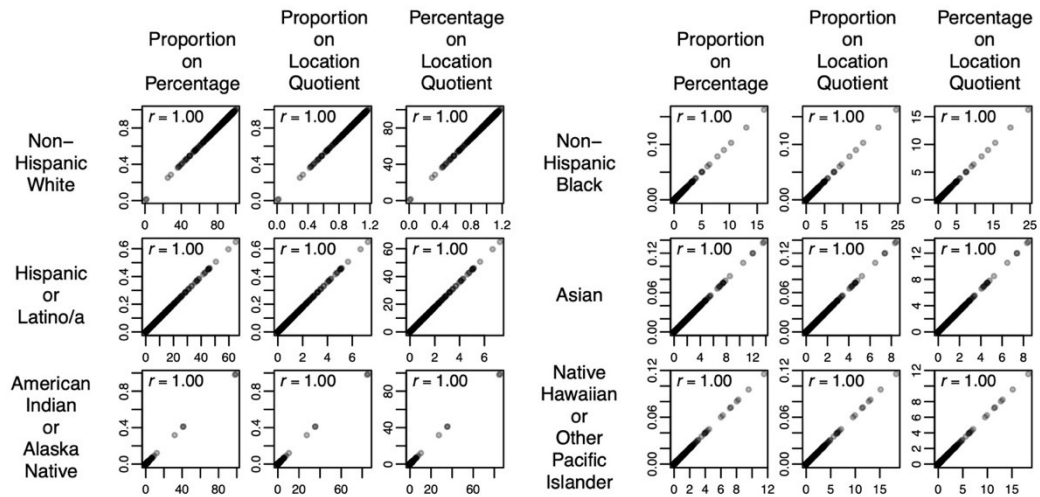

Figure S127. Relationships between census-tract-based measures in the State of Utah (2000).

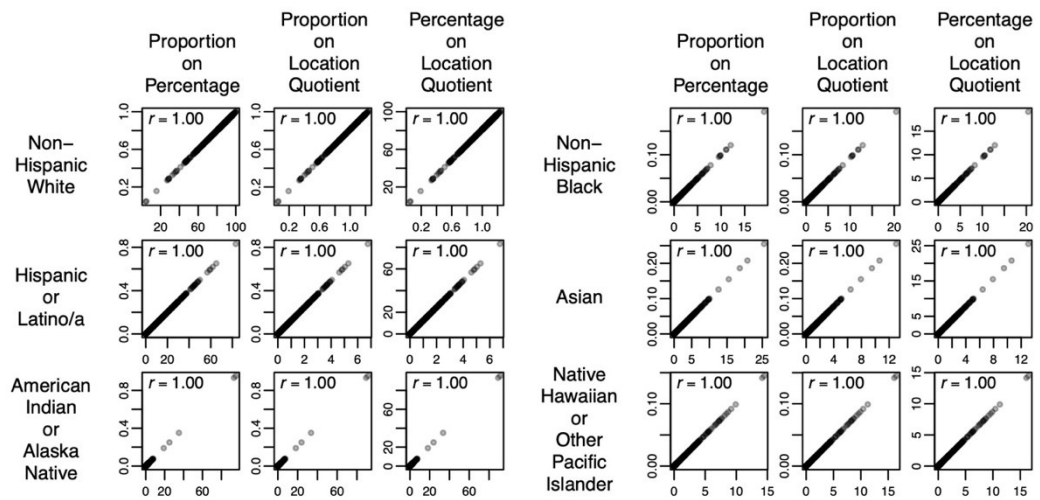

Figure S128. Relationships between census-tract-based measures in the State of Utah (2010).

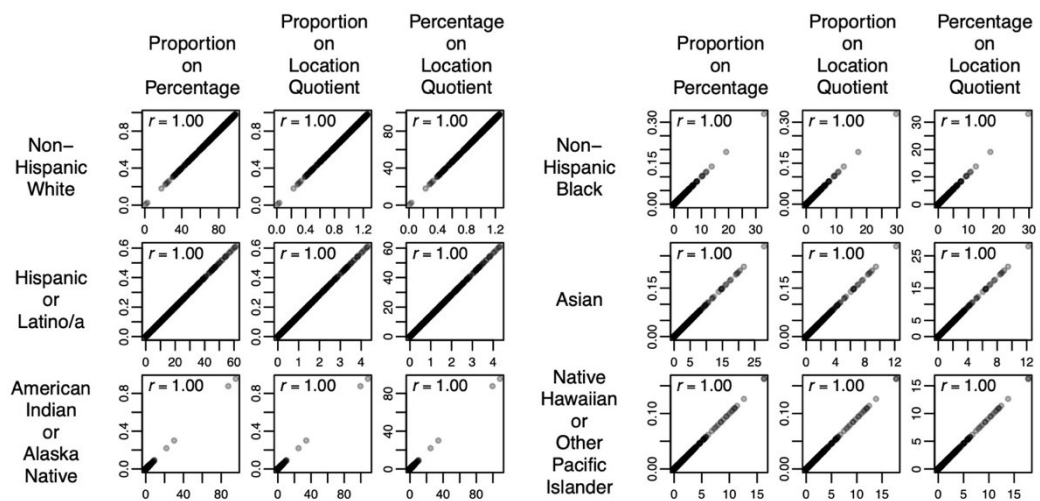

Figure S129. Relationships between census-tract-based measures in the State of Utah (2020).

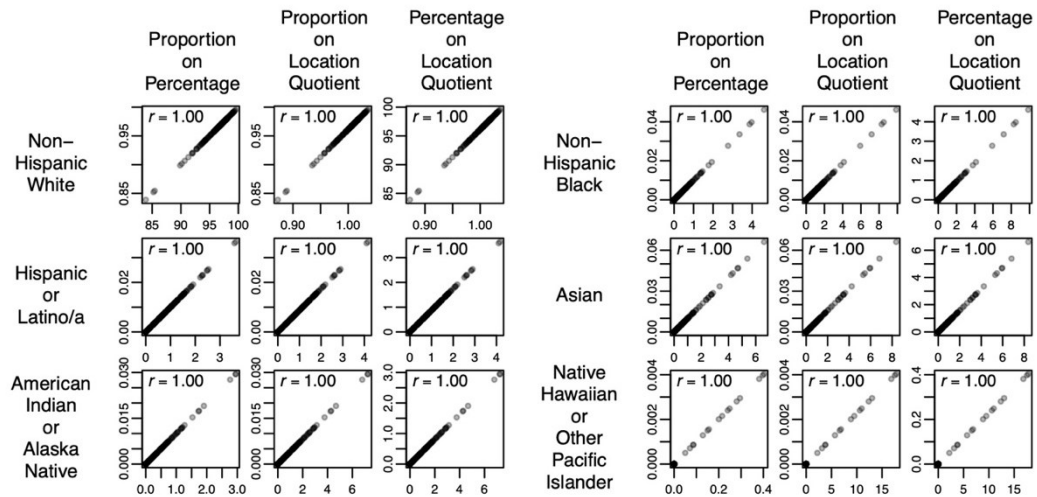

Figure S130. Relationships between census-tract-based measures in the State of Vermont (2000).

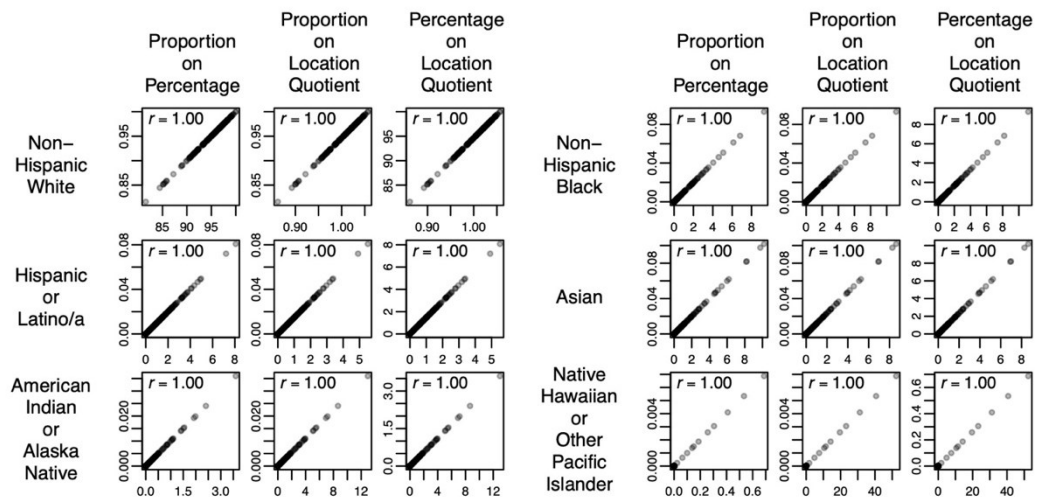

Figure S131. Relationships between census-tract-based measures in the State of Vermont (2010).

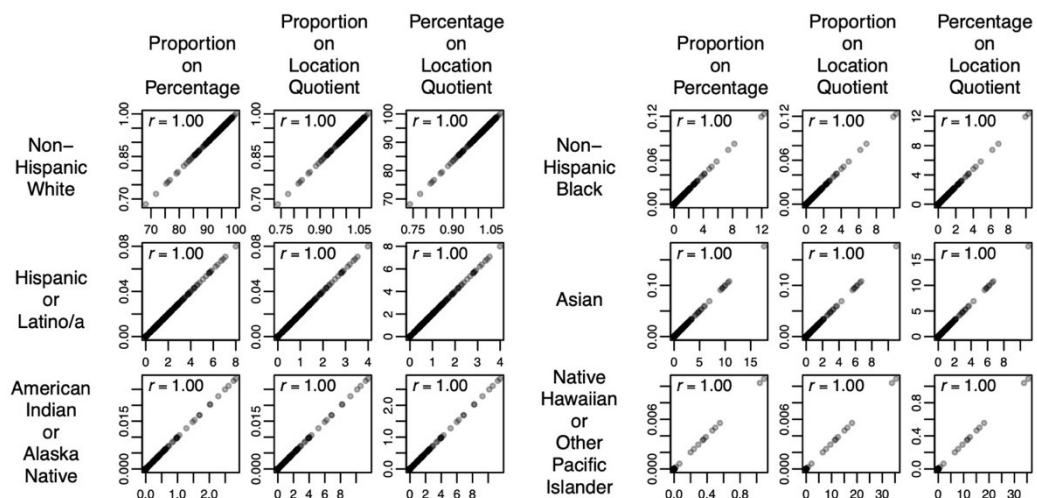

Figure S132. Relationships between census-tract-based measures in the State of Vermont (2020).

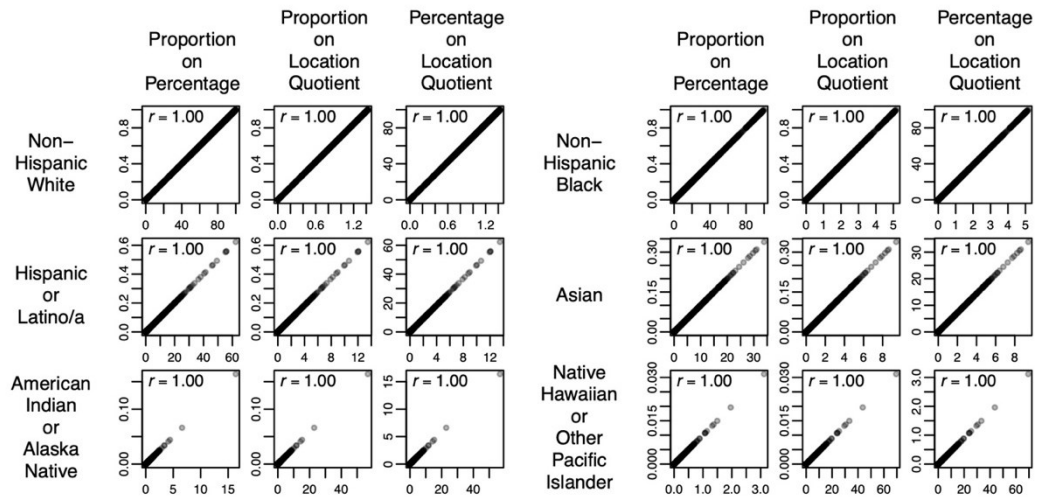

Figure S133. Relationships between census-tract-based measures in the State of Virginia (2000).

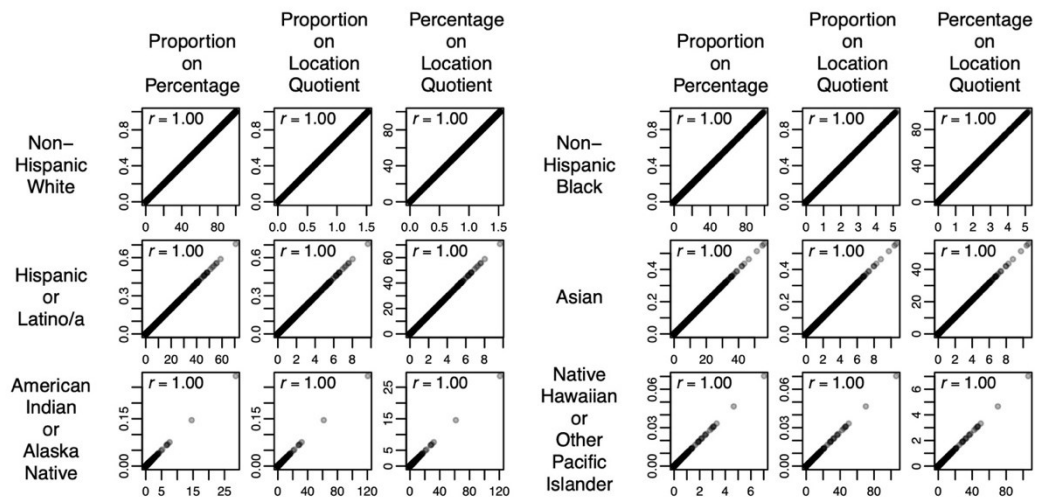

Figure S134. Relationships between census-tract-based measures in the State of Virginia (2010).

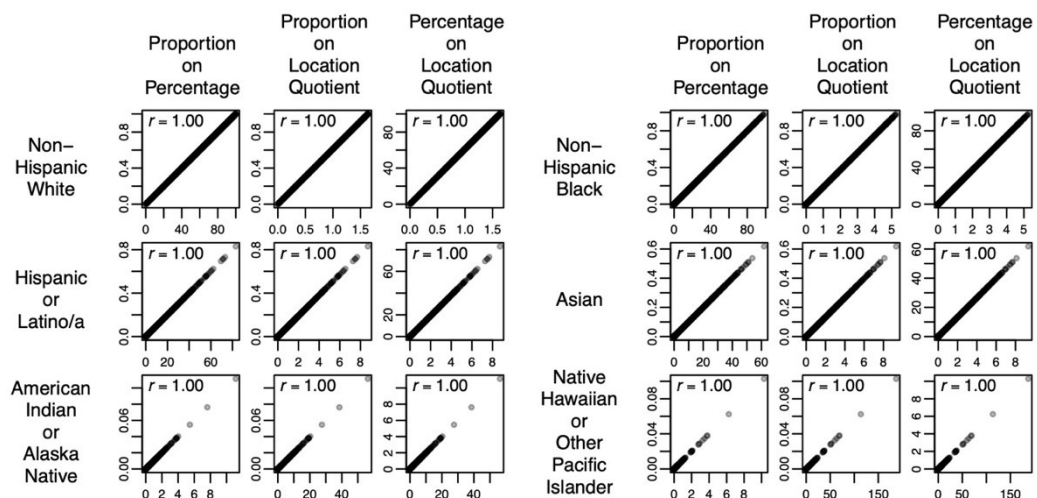

Figure S135. Relationships between census-tract-based measures in the State of Virginia (2020).

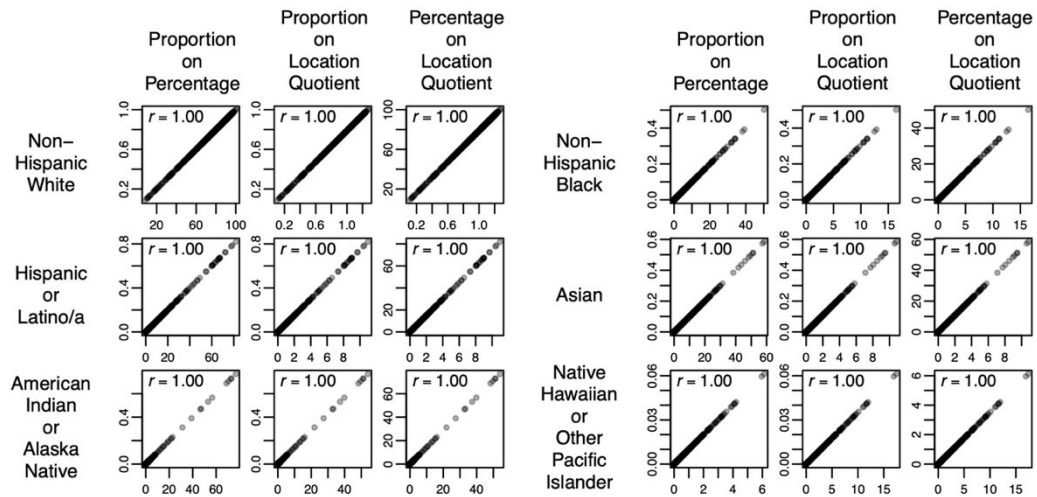

Figure S136. Relationships between census-tract-based measures in the State of Washington (2000).

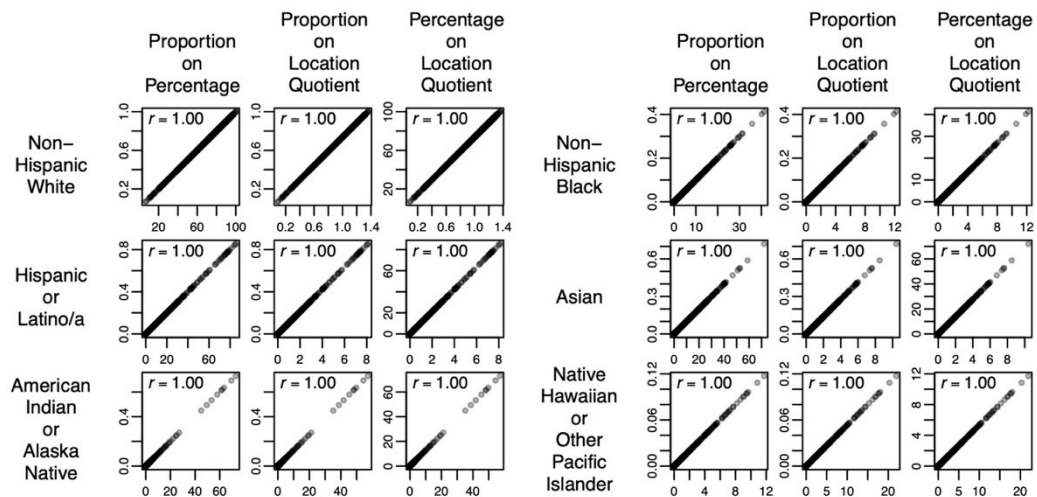

Figure S137. Relationships between census-tract-based measures in the State of Washington (2010).

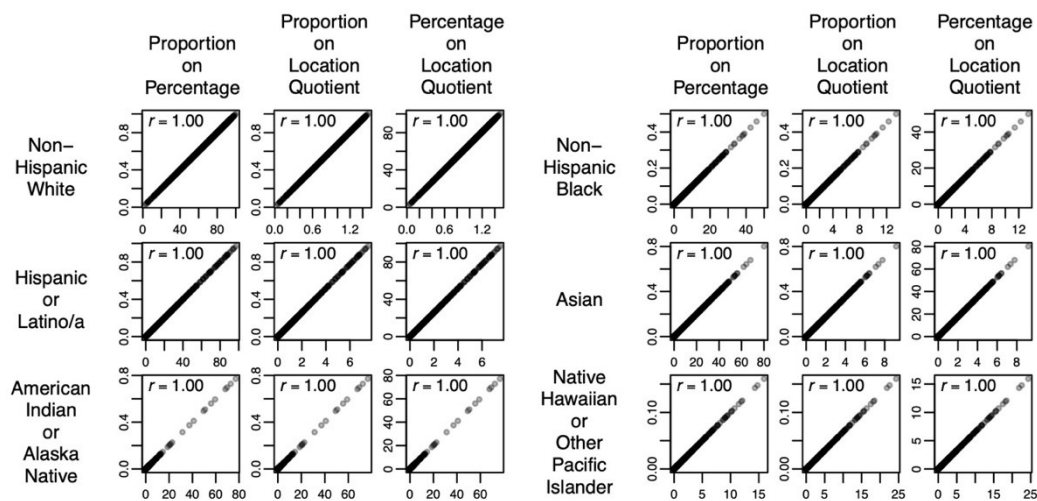

Figure S138. Relationships between census-tract-based measures in the State of Washington (2020).

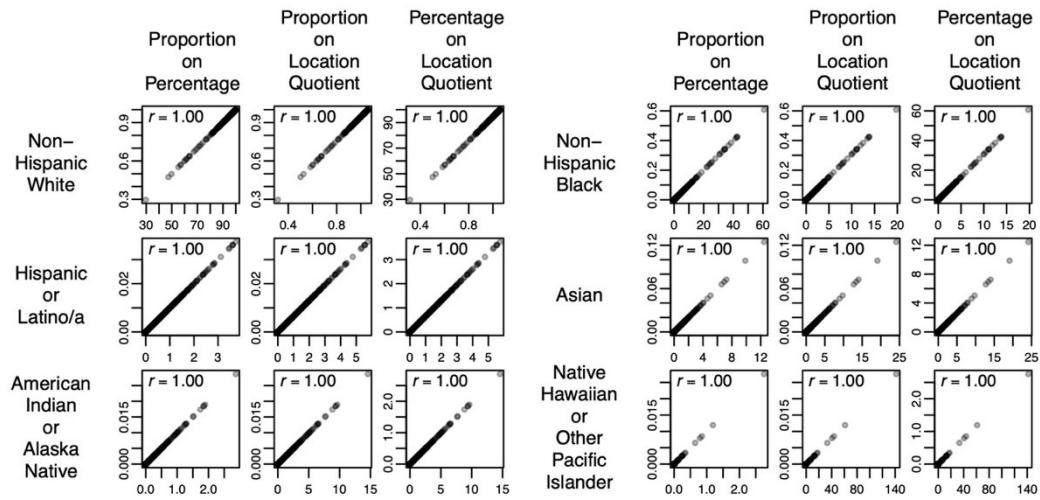

Figure S139. Relationships between census-tract-based measures in the State of West Virginia (2000).

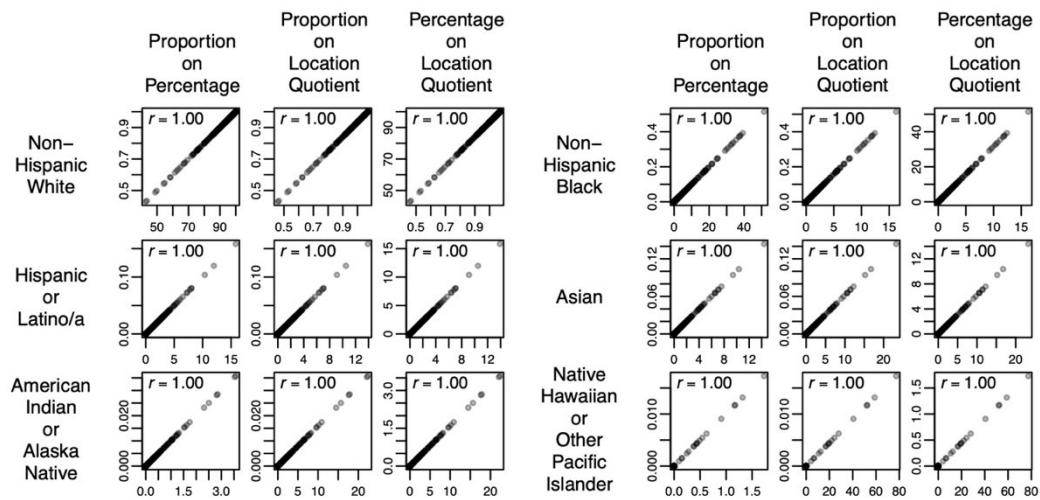

Figure S140. Relationships between census-tract-based measures in the State of West Virginia (2010).

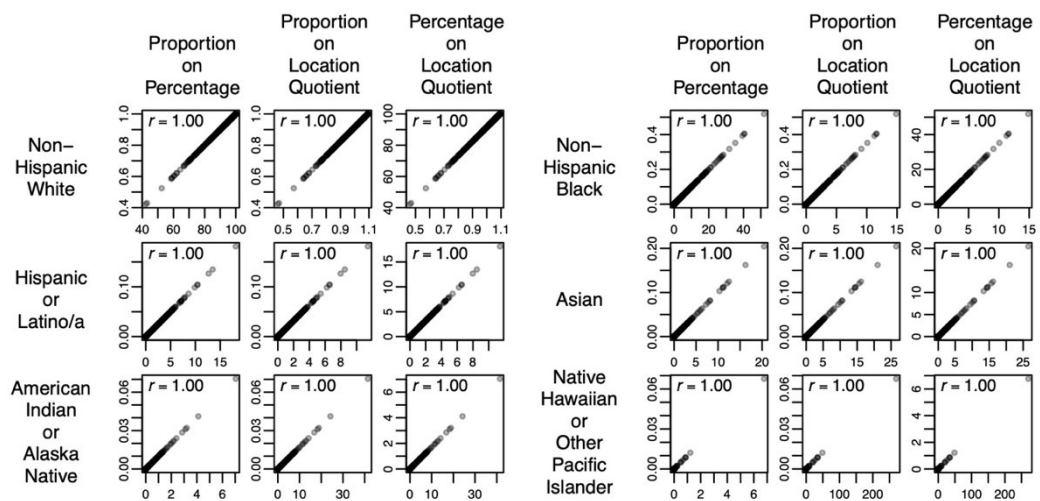

Figure S141. Relationships between census-tract-based measures in the State of West Virginia (2020).

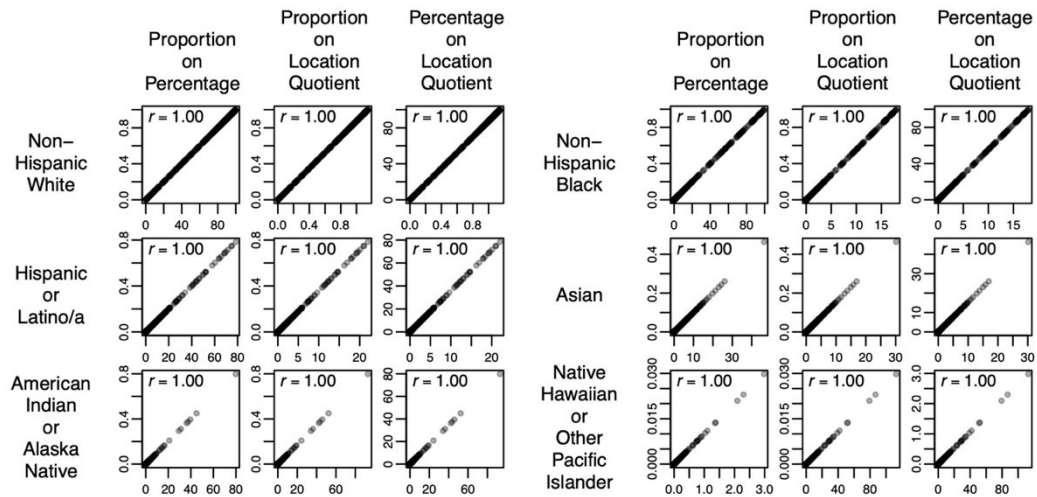

Figure S142. Relationships between census-tract-based measures in the State of Wisconsin (2000).

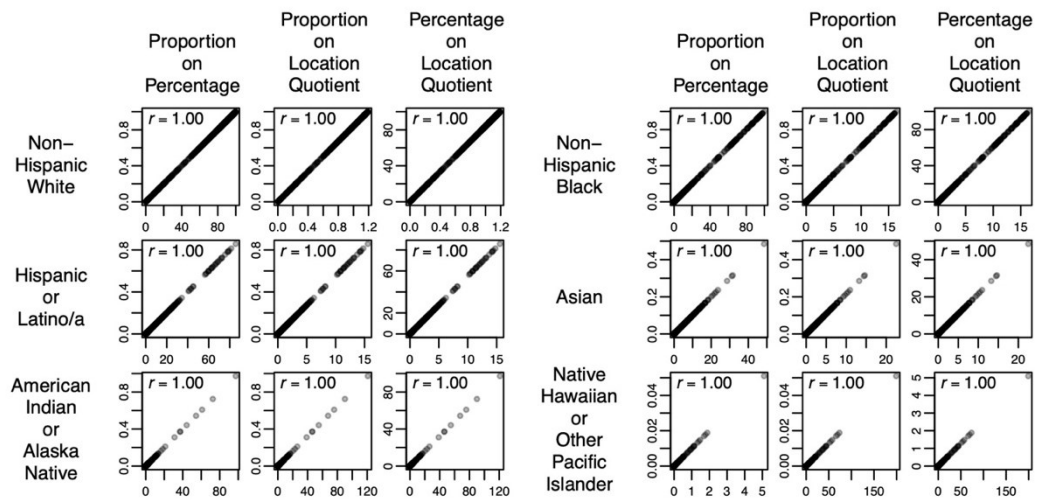

Figure S143. Relationships between census-tract-based measures in the State of Wisconsin (2010).

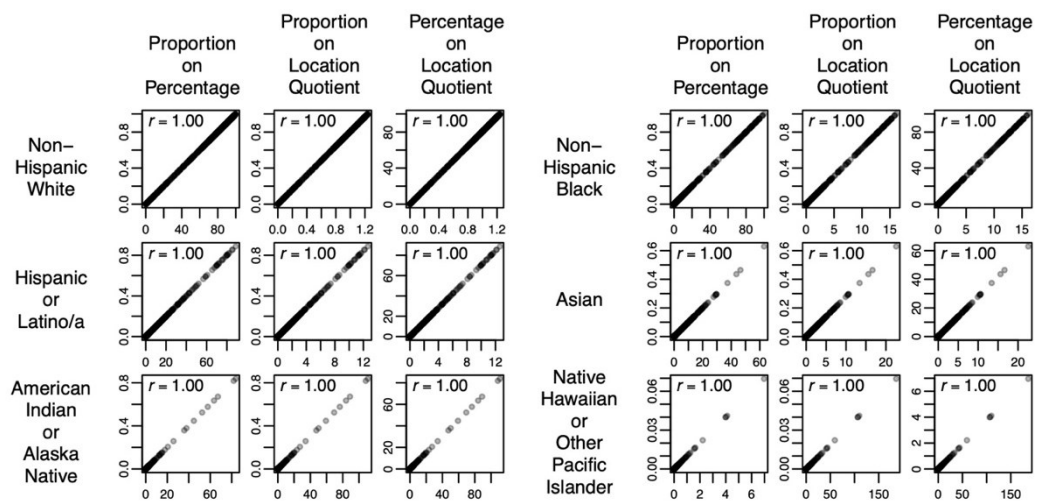

Figure S144. Relationships between census-tract-based measures in the State of Wisconsin (2020).

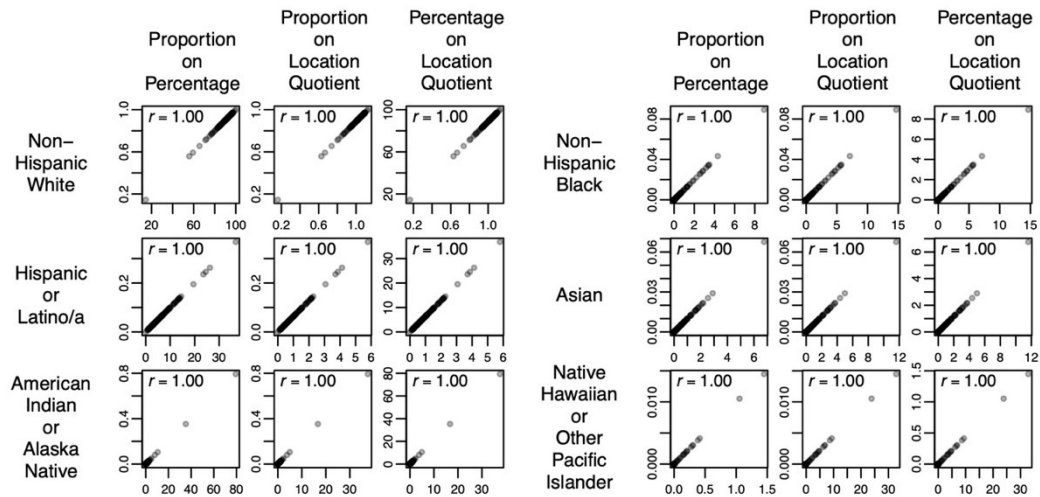

Figure S145. Relationships between census-tract-based measures in the State of Wyoming (2000).

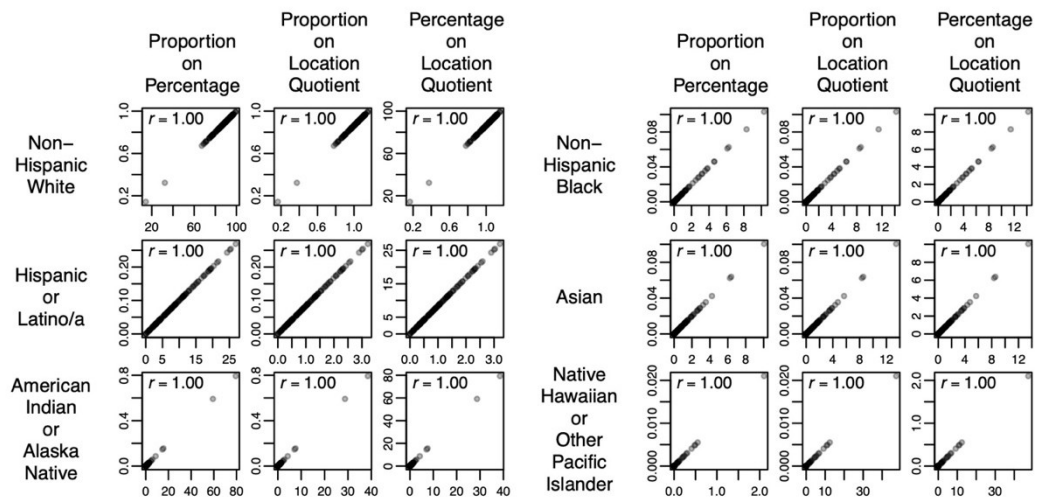

Figure S146. Relationships between census-tract-based measures in the State of Wyoming (2010).

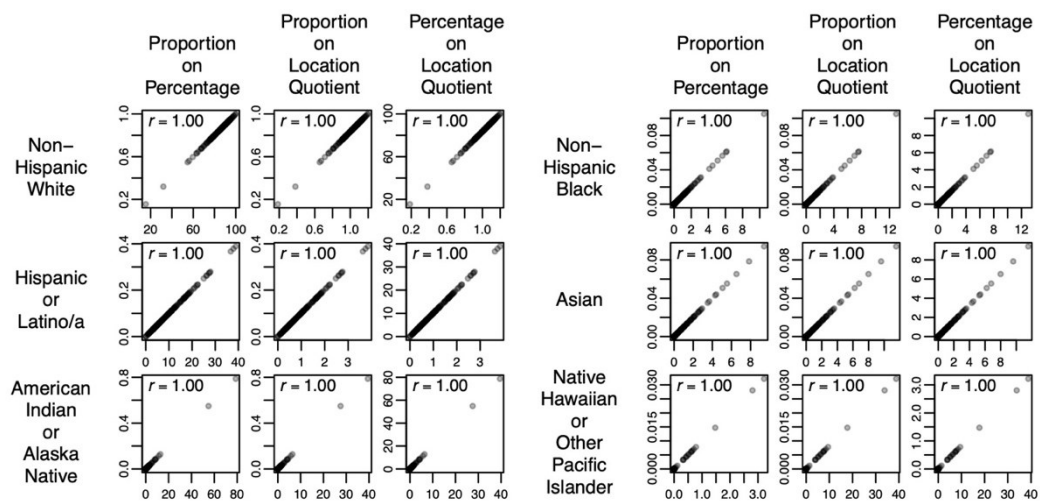

Figure S147. Relationships between census-tract-based measures in the State of Wyoming (2020).
